# Supplementary material
Source: PubMed Central journal article supplement (PMC3710821)
Supplement: 1304246110_sapp.pdf [file 1304246110_sapp.pdf]

## **Supplementary Appendix:**

### **Prevalent genome streamlining and latitudinal divergence of planktonic bacteria in the surface ocean**

Brandon K. Swan, Ben Tupper, Alexander Sczyrba, Federico M. Lauro, Manuel Martinez-Garcia, José M. González, Haiwei Luo, Jody J. Wright, Zachary C. Landry, Niels W. Hanson, Brian P. Thompson, Nicole J. Poulton, Patrick Schwientek, Silvia G. Acinas, Stephen J. Giovannoni, Mary Ann Moran, Steven J. Hallam, Ricardo Cavicchioli, Tanja Woyke and Ramunas Stepanauskas

#### **Supplementary Text**

Results and Discussion

Materials and Methods

#### **Supplementary Figures S1-S12**

#### **Supplementary Tables S1-S10**

#### **Supplementary References**

## Supplementary Results and Discussion: Lineage-specific features of SAGs

The Marine Group A (MGA; also known as SAR406) is a phylum-level lineage, members of which are abundant throughout the ocean (1, 2). No MGA cultures are available, and their biology remains obscure. Here we sequenced five SAGs from the Gulf of Maine and the North Pacific Subtropical Gyre, all of which are affiliated with the subgroup ZA3312c (Fig. S3). General features of MGA SAGs, such as % GC, % non-coding DNA and frequencies of COG categories are similar to many of the Proteobacteria lineages and indicate genome streamlining and adaptations to oligotrophy (Fig. 2A). The presence of proteorhodopsin (Fig. S4) and polysulfide reductase genes in all five SAGs suggest that MGA supplement their heterotrophic energy sources by non-photosynthetic light harvesting and the oxidation of sulfur compounds.

Planktonic Verrucomicrobia are also widespread in surface ocean, constituting ~2% of heterotrophic bacterioplankton, yet lack cultured representatives (3). Recently, we found that certain Verrucomicrobia lineages specialize in the hydrolysis of polysaccharides (4). Here we report partial genomes of eight Gulf of Maine SAGs of class Verrucomicrobiae, four Gulf of Maine SAGs of Subdivision 3 and three SAGs of class Opitutae from the North Pacific subtropical gyre. All analyzed SAGs have elevated frequencies of genes encoding cell surface and extracellular proteins (Fig. 2A), and glycoside hydrolases (Fig. S5, Table S8), suggesting that specialization in polysaccharide degradation is a common feature among marine Verrucomicrobia. All SAGs from both the open ocean and coastal areas possessed a vast repertoire of glycoside hydrolases (Fig. S5), which would provide the metabolic machinery for the utilization of diverse and complex biopolymers (Table S7). Principal Component Analysis (PCA) of glycoside hydrolases from SAGs showed several Verrucomicrobia and Bacteroidetes from different geographical regions shared a similar set of these genes, suggesting that they might utilize similar polysaccharide substrates while others, such as AAA168-F10, may be more specialized (Fig. S6). Several Verrucomicrobia SAGs from the Gulf of Maine were found to contain phage-like DNA, indicating either infections, phage attachment on cell surface, or active uptake of phage DNA by the cell. The three Opitutae SAGs exhibited a unique biogeographic pattern, by recruiting metagenome reads almost exclusively from the centers of the two analyzed subtropical gyres (Figs. 1 and 3).

Two SAGs from marine Actinobacteria were sequenced, designated AAA015-M09 and AAA015-D07. Both SAGs had relatively low GC content (~32%). Both SAGs are closely related to the SAR432 group of marine Actinobacteria by SSU rRNA gene phylogeny (5). AAA015-D07 and AAA015-M09 were determined to be approximately 99% identical to each other and 98% identical to the original SAR432 clone, based on SSU rRNA gene comparisons. Gene annotations of coding sequences indicate an aerobic heterotrophic lifestyle. Both SAGs appear to have genes comprising large portions of the pentose phosphate pathway, suggesting that these organisms may be able to use sugars as a carbon or energy source. Additionally, a number of genes for glycolysis/gluconeogenesis are encoded. Both genomes also encode sequences for multiple cytochrome P450 proteins (6, 7), aromatic ring hydroxylases (8-14), and nitroreductases (12, 13, 15), suggesting that these organisms could play a role in the breakdown of recalcitrant dissolved organic matter in the ocean. Other metabolic genes of interest common to both genomes include short-chain alcohol dehydrogenases of unknown specificity and formate hydrogen lyases, indicating that these organisms may be able to utilize C1 compounds as a source of energy (16). Both genomes include annotated genes for low (*caa3*) and high (*cbb3*) affinity cytochrome C oxidases, suggesting adaptation to growth in a wide range of oxygen concentration (17, 18). These bacteria may periodically inhabit an environment with a reduced oxygen content, for instance, within a marine snow aggregate (18, 19). AAA015-M09 encodes candidate genes for a full TCA cycle and the AAA015-D07 contigs appear to contain most of the genes for a TCA cycle as well. Both SAGs also have predicted coding sequences for isocitrate lyase and malate synthase, confirming the presence of a glyoxalate bypass. These organisms appear to rely heavily on ABC transporters for transport, with AAA015-D07 containing coding sequences for 22 ABC transporter monomeric proteins and AAA015-M09 containing 32 sequences. Seven other transporters of varying other types were found in AAA015-D07 and nine in AAA015-M09. AAA015-D07 has transporters predicted to play a role in copper or nickel acquisition. A cobalt transporter is present in M09, suggesting that vitamin B12 may be a required cofactor for these organisms. This is supported by the inclusion of other genes related to cobalamin synthesis and modification, for instance, cobalamin adenosyltransferase and adenosyl cobanimide kinase, both found in AAA015-M09. Additionally, AAA015-D07 contains an adenosylcobalamin-dependent ribonucleoside-diphosphate reductase, suggesting that it also likely requires vitamin B12 as a growth factor. The SAGs also carry 17 and 16 glycosyltransferase genes in AAA015-D07 and AAA015-M09, respectively. Most likely, these enzymes play a role in cell wall biosynthesis, however alternative roles should be considered.

Expansion of glycosyltransferase paralogs in these genomes suggests an important role for them in the evolution of the SAR432 lineage.

The Alphaproteobacteria lineage SAR116 is ubiquitous in the surface ocean, and two genomes of cultures are publicly available (20, 21). In difference to these cultures, most of the 9 sequenced SAGs contain form I carbon monoxide (CO) dehydrogenase (Fig. S7), with the characteristic AYXCSFR motif, which has been suggested to be the only genuine CO dehydrogenase (22). One SAG from the relatively productive Gulf of Maine encodes a green-tuned rhodopsin, while three SAGs from the ultraoligotrophic South Atlantic subtropical gyre and the Mediterranean Sea encode blue-tuned rhodopsins (Fig. S4), which is in agreement with previously proposed rhodopsin adaptations to *in situ* light conditions (23). In contrast to the cultures, SAGs AAA015-N04 and AAA536-K22 encode *sox* operons, with similar organization to *sox* in two of the *Roseobacter* SAGs, indicating their capacity for S oxidation (Fig. S7). In AAA015-N04, this operon is adjacent to the *cox* operon and is in the vicinity of rhodopsin, ATPase and cytochrome c genes, indicating their metabolic importance and potential co-regulation (24). Thus, our data suggest a variety of previously reported and novel mixotrophy strategies within the SAR116 cluster, which resemble those found in the *Roseobacter* sister-cluster (25, 26).

The Roseobacter cluster within the Alphaproteobacteria is an abundant and among the best-studied lineages of marine bacterioplankton, with ~40 genomes currently available from cultures (25, 26). Yet, certain subclusters have resisted cultivation, and the cultivated subset of *Roseobacter* may be metabolically biased, as compared to the predominant relatives in the environment (26). Among the five *Roseobacter* SAGs, one (AAA076-C03) is closely related to the cultured strain HTCC2255 and represents a basal group in the lineage, whereas the other four (AAA015-O19, AAA076-E06, AAA298-K06, AAA300-J04) constitute a monophyletic clade in which no cultured representatives are found (Fig. S8). In agreement with cultured *roseobacters*, SAGs contained genes for DMSP and aromatic compound degradation, carbon monoxide oxidation, C1 utilization, C2 processing through the ethylmalonyl CoA pathway, and photoheterotrophy based on proteorhodopsin (AAA076-C03 only) in addition to the known aerobic anoxygenic phototrophy capability (AAA298-K06 only). The SAGs also contained 615 novel to *Roseobacter* ORFs, 70% of which encoded hypothetical or unnamed proteins, and the remaining novel ORF encoded toxin resistance, secondary metabolite biosynthesis, phage-related functions, and uncharacterized oxidases and hydrolases (the apparently phage-dominated

SAG AAA076-E06 was excluded from this analysis). The SAGs have 37-40% GC content, which is significantly lower than 49-70% found in cultures (except for 37% GC in HTCC2255). The SAGs have smaller genomes (estimated at 2.8-3.8 Mbp; Table S2) than cultured *Roseobacter* (median = 4.4 Mbp). Other genome features (Fig. 2) also differ between *Roseobacter* cultures and SAGs, in support of the recent suggestion (26) that the predominant *Roseobacter* in the environment have more streamlined genomes and are better adapted to oligotrophic conditions than the available cultures.

Genome analyses of several SAGs from the Gammaproteobacteria lineages SAR86, ARCTIC96BD-19 and SAR92 revealed significant metabolic flexibility, with each group possessing the genetic potential to utilize different pathways. Proteorhodopsin was identified in 11 out of the 13 SAGs analyzed (Table S10). Only the SAR92 SAGs contain a majority of genes required for the biosynthesis of retinal, which is required for proteorhodopsin functionality (27). Although the other Gammaproteobacteria SAGs were found to only possess geranylgeranyl diphosphate synthase (*crtE*), all proteorhodopsin genes within SAR86 have a dehydrogenase upstream, an arrangement noted in fosmids (28) and other SAR86 single cell genomes (29). It has been suggested that this dehydrogenase could convert retinal or  $\beta$ -carotene to retinol, but this would require the pigment to be taken up from the environment (29). Two ARCTIC96BD-19 SAGs (AAA076-D13 and AAA076-F14) contain two copies of proteorhodopsin that are divergent and form separate phylogenetic clusters (Fig. S3). This is not surprising, as it is well documented that proteorhodopsin undergoes duplication and lateral transfer quite frequently (27). All SAG proteorhodopsin sequences are of the spectrally green tuned variant (30). Genes encoding near-complete Embden-Meyerhof-Parnas, pentose phosphate, and modified Entner-Doudoroff central metabolic pathways were detected within these Gammaproteobacteria SAGs, with some notable differences between groups (Table S9). The oxidative component of pentose phosphate pathway is not well represented within SAR86 but is complete in the majority of ARCTIC96BD-19 SAGs. Also, several SAR86 and SAR92 SAGs contain genes for the Entner-Doudoroff pathway, but the key genes for this pathway were not detected in ARCTIC96BD-19 SAGs. All SAGs contain a near-complete tricarboxylic acid cycle (TCA) with the exception that all SAR86 SAGs are lacking citrate synthase. Dupont et al. (29) also found this key gene missing from their SAR86 single cell genomes and suggested this group may use a combination of the TCA and methylTCA cycles, with the latter utilizing several methylcitrate enzymes. 2-Methylcitrate synthase, methylcitrate lyase, and methylcitrate dehydrogenase were detected in all SAR86 and some ARCTIC96BD-19 SAGs. Only the ARCTIC96BD-19 SAGs contain genes for inorganic carbon

fixation, which was previously reported by Swan et al. (31) for genomes of this group from the mesopelagic. Only ARCTIC96BD-19 SAGs contain genes for sulfur oxidation (adenylylsulfate reductase, *aprA*; sulfite reductase), with no other reductases being found in any of the SAGs. Aside from the potential for chemoautotrophic growth by ARCTIC96BD-19, the potential for a heterotrophic metabolism appears to be dominant among these lineages.

Members of the Bacteroidetes phylum comprise 10-20% of the total marine heterotrophic bacterioplankton (32, 33). Metagenome fragment recruitment indicated that relatives of SAG AAA536-G18 are widely distributed in temperate and tropical waters, whereas a more restricted distribution to the temperate zone was found for the relatives of SAGs MS220-5C and MS190-1F (Fig. 3). Based on the 98% SSU rRNA gene identity to the culture *Polaribacter* sp. MED152, SAG AAA160-P02 may be considered a member of this genus, which appears to be abundant in both temperate and polar waters (34-37). Considering the high estimated genome completeness (84.9%; Table S2), and that it is a better recruiter of metagenome sequences than its cultured relatives, AAA160-P02 provides important information on this numerically important group. *Polaribacter* genomes, including AAA160-P02, encode green light-tuned proteorhodopsins, as indicated by Met105 (38). Proteorhodopsin was not detected in SAG AAA536-G18, but *blh* ( $\beta$ -carotene 15,15'-monooxygenase) and other genes needed to synthesize retinal are present. Similarly to cultured Bacteroidetes (37, 39, 40), the gene content of Bacteroidetes SAGs suggests specialization for growth on particles and high molecular weight compounds, including peptides and polysaccharides. Accordingly, we detected genes involved in gliding motility, exopolysaccharide biosynthesis and adhesion. The majority of genes required for glycolysis, gluconeogenesis and the TCA cycle were also detected. Furthermore, we found genes encoding PEP carboxylase in AAA160-P02 and AAA536-G18, malic enzyme in AAA160-P02, and pyruvate carboxylase in MS024-2A, indicating the potential for anaplerotic metabolism.

## **Materials and Methods**

### SAG genomic sequencing, assembly and annotation

With the exception of SAGs MS024-2A, MS024-3C, MS190-1F, and MS220-5C, draft genomes were generated at the DOE Joint genome Institute (JGI) using the Illumina technology (41). Illumina standard shotgun libraries were constructed and sequenced using the Illumina HiSeq 2000 platform.

All general aspects of library construction and sequencing performed at the JGI can be found at <http://www.jgi.doe.gov>. All raw Illumina sequence data was passed through DUK, a filtering program developed at JGI, which removes known Illumina sequencing and library preparation artifacts. The following steps were then performed for assembly: 1) filtered Illumina reads were assembled using Velvet v. 1.1.04 (42), 2) 1–3 kbp simulated paired end reads were created from Velvet contigs using wgsim (<http://github.com/lh3/wgsim>), 3) Illumina reads were assembled with simulated read pairs using Allpaths-LG v. r41043 (43). Parameters for assembly steps were: 1) Velvet: 63 -shortPaired and velvetg: -very clean yes -export -Filtered yes -min contig lgth 500 -scaffolding no -cov cutoff 10, 2) wgsim: -e 0 -1 100 -2 100 -r 0 -R 0 -X 0, 3) Allpaths: -LG PrepareAllpathsInputs: PHRED 64=1 PLOIDY=1 FRAG COVERAGE=125 JUMP COVERAGE=25 LONG JUMP COV=50, RunAllpathsLG: THREADS=8 RUN=std shredpairs TARGETS=standard VAPI WARN ONLY=True OVERWRITE=True.

The draft genomes of *Flavobacteria* sp. MS190-1F and MS220-5C were generated at the DOE Joint genome Institute (JGI) using a combination of Illumina (44) and 454 technologies (45). For the MS190-1F genome, we constructed and sequenced an Illumina GAii shotgun library which generated 13,362,482 reads totaling 481 Mbp, a 454 Titanium standard library which generated 446,098 reads and 2 paired end 454 libraries with an average insert size of 5 kbp which generated 753,634 reads totaling 145.8 Mbp of 454 data. For MS220-5C genome, we constructed and sequenced an Illumina GAii shotgun library which generated 11,376,334 reads totaling 409.5 Mbp, a 454 Titanium standard library which generated 559,605 reads and 2 paired end 454 libraries with an average insert size of which generated 530,819 reads totaling 127.6 Mbp of 454 data. All general aspects of library construction and sequencing performed at the JGI can be found at <http://www.jgi.doe.gov/>. The initial draft assembly of MS190-1F and MS220-5C contained 1317 contigs in 33 scaffolds, and 1066 contigs in 149 scaffolds, respectively. The 454 Titanium standard data and the 454 paired end data were assembled together with Newbler, version 2.3-PreRelease-6/30/2009. The Newbler consensus sequences were computationally shredded into 2 kbp overlapping fake reads (shreds). Illumina sequencing data was assembled with VELVET, version 1.0.13 (46), and the consensus sequence were computationally shredded into 1.5 kbp overlapping fake reads (shreds). We integrated the 454 Newbler consensus shreds, the Illumina VELVET consensus shreds and the read pairs in the 454 paired end library using parallel phrap, version SPS - 3.65 (High Performance Software, LLC). The software Consed (47, 48) was used in the following finishing process. Illumina data was used to correct

potential base errors and increase consensus quality using the software Polisher developed at JGI. Possible mis-assemblies were corrected using gapResolution, Dupfinisher (49), or sequencing cloned bridging PCR fragments with subcloning. Gaps between contigs were closed by editing in Consed, by PCR and by Bubble PCR primer walks. The estimated genome size of MS190-1F is 2.4 Mbp and the final assembly is based on 63.6 Mbp of 454 draft data which provides an average 26.5x coverage of the genome and 480.3 Mbp of Illumina draft data which provides an average 200.1x coverage of the genome. The estimated genome size of MS220-5C is 1.6 Mbp and the final assembly is based on 33.9 Mbp of 454 draft data which provides an average 21.2x coverage of the genome and 408.2 Mbp of Illumina draft data which provides an average 255.1x coverage of the genome. Sequencing and assembly details of draft genomes of *Flavobacterium* sp. MS024-2A and MS024-3C are published in Woyke et al. (50).

Genes were identified using Prodigal (51). The predicted CDSs were translated and used to search the National Center for Biotechnology Information (NCBI) nonredundant database (nr), UniProt, TIGRFam, Pfam, KEGG, COG, and InterPro databases. The tRNAScan-SE tool (52) was used to find tRNA genes, whereas ribosomal RNA genes were found by searches against models of the ribosomal RNA genes built from SILVA (53). Other non-coding RNAs such as the RNA components of the protein secretion complex and the RNase P were identified by searching genomes for the corresponding Rfam profiles using INFERNAL (54). Additional gene prediction analysis and manual functional annotation was performed within the Integrated Microbial Genomes (IMG) (55) platform developed by the Joint Genome Institute, Walnut Creek, CA, USA (<http://img.jgi.doe.gov>).

#### SAG whole genome sequence quality control

Each raw sequence data set was screened against all finished bacterial and archaeal genome sequences (downloaded from NCBI) and the human genome to identify potential contamination in the sample. Reads were mapped against reference genomes with bwa version 0.5.9 (56) using default parameters (96% identity threshold). None of the libraries showed significant contamination. Additionally, gene sequences of the final assemblies (see below) were compared against the GenBank nr database by BLASTX and taxonomically classified using MEGAN (57).

To further verify the absence of contaminating sequences in the assemblies, tetramer frequencies were extracted from all scaffolds using two alternative settings: 1) sliding window of 1000 bp and 100



bp step size and 2) sliding window of 5000 bp and 500 bp step size. Reverse-complementary tetramers were combined and the frequencies represented as a  $N \times 136$  feature matrix, where  $N$  is the number of windows and each column of the matrix corresponds to the frequency of one of the 136 possible tetramers. Principal component analysis (PCA) was then used to extract the most important components of this high dimensional feature matrix. The analysis produced unimodal distribution along the first four PCs for the majority of SAGs, suggesting homogenous DNA sources. Scaffolds representing extremes on the first four PCs were identified and manually examined for their closest TBLASTX hits against NCBI nt database.

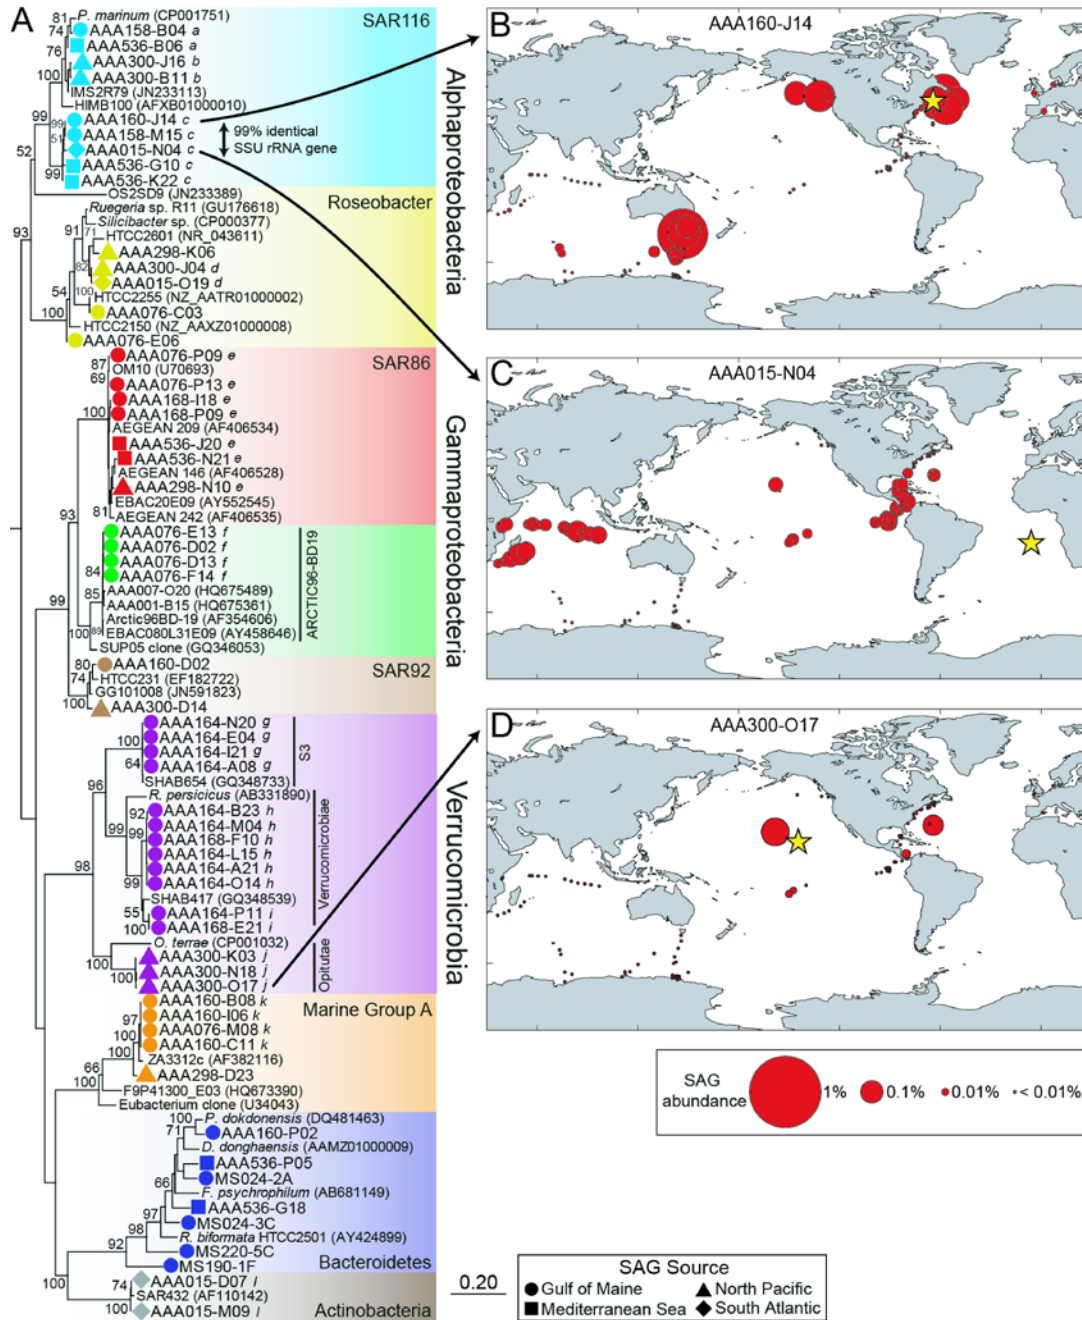

**Figure S1. Phylogenetic and geographic distribution of single amplified genomes (SAGs).** Phylogenetic tree of SSU rRNA gene sequences from single amplified genomes (SAGs; color symbol) and closely related cultures and environmental clones (A); and geographic distribution of selected SAGs, as inferred from metagenomic fragment recruitment (B-D). The phylogenetic tree was inferred using maximum likelihood in PhyML, with bootstrap values  $\geq 50\%$  indicated at nodes. *Thermococcus peptonophilus* was used as the outgroup. Lower-case letters to the right of the genome's name indicate SAGs with SSU rRNA identities  $\geq 97\%$ . A threshold of  $\geq 95\%$  nucleotide sequence identity of alignments  $\geq 200$  bp was applied in BLASTN-based fragment recruitment. The estimated SAG genotype abundance indicates the fraction of aligned metagenome sequences, normalized by SAGs' estimated genome size. The SSU rRNA sequences of SAR116 SAGs AAA160-J14 and AAA015-N04 are  $\geq 99\%$  identical. The stars in panels B-D indicate the SAG sampling locations.

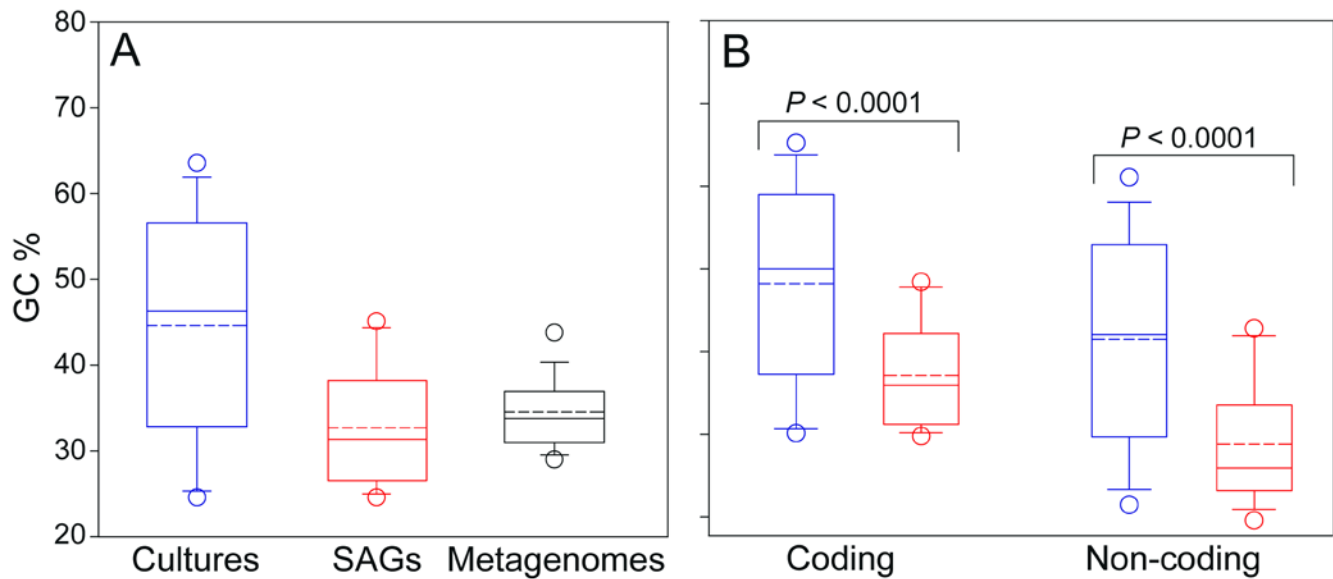

**Figure S2. GC content comparisons.** GC content differences between single amplified genomes (SAGs), cultured bacterioplankton, and metagenome sequences (A). GC content of coding and non-coding genome regions of cultures (n=101; blue box plots) and SAGs (n=41; red box plots) (B). Box plots show median (solid line), mean (dashed line), 75th and 25th percentiles (top and bottom of box, respectively), 90th and 10th percentiles (top and bottom bar), and 95th and 5th percentiles (open circles) of GC content. T-tests were used to determine statistical significance of differences.

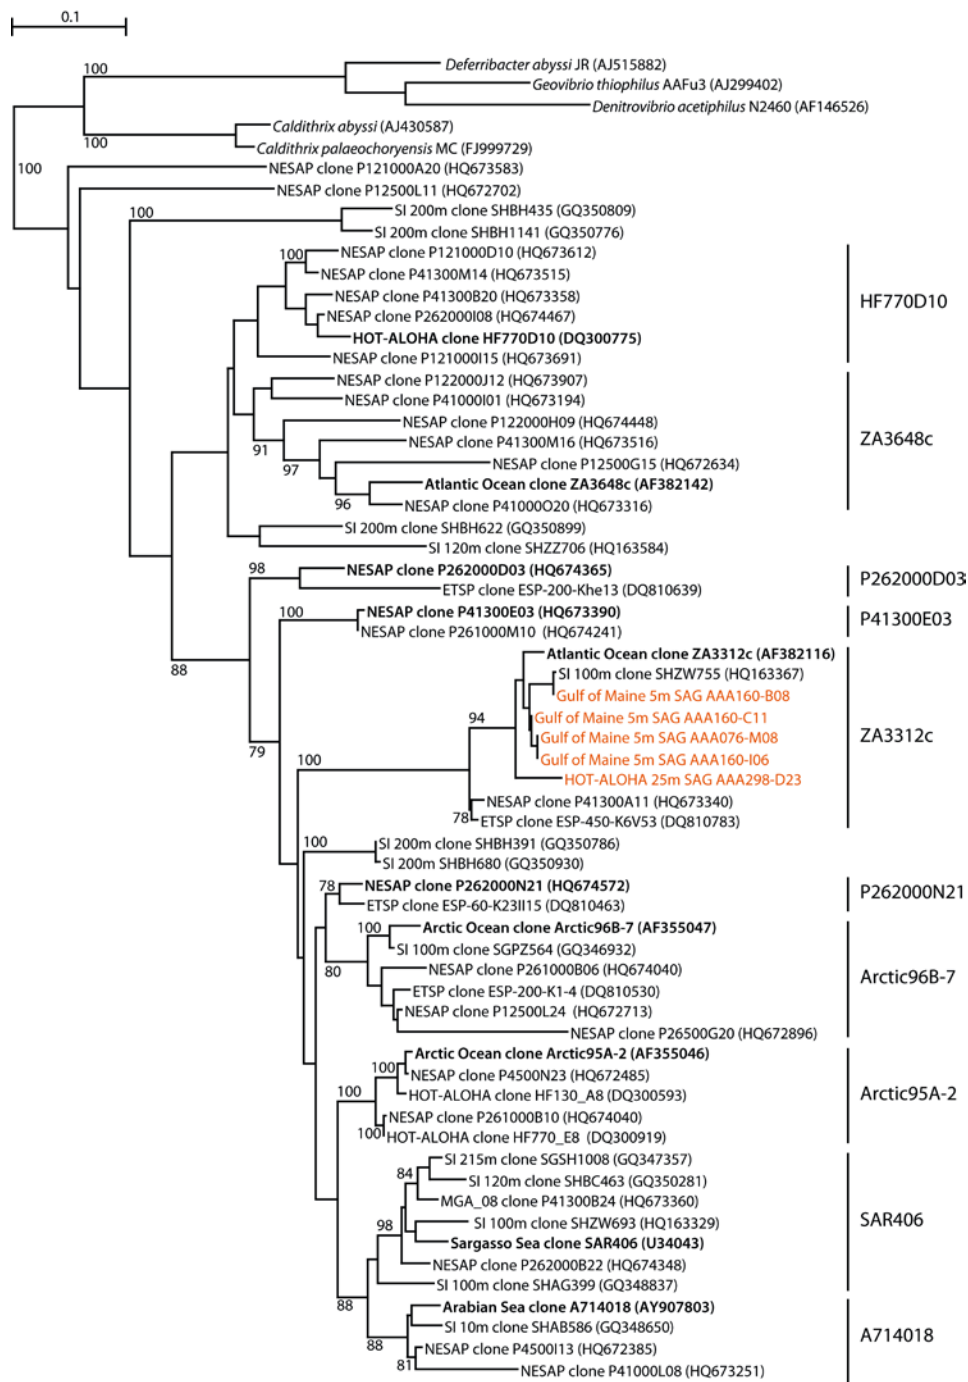

**Figure S3. Phylogenetic analysis of MGA.** Unrooted phylogenetic tree based on SSU rRNA gene sequences derived from clone libraries and SAGs, showing the phylogenetic affiliation of MGA SAGs (orange) identified in this study. The tree was inferred using maximum likelihood implemented in PhyML using an HKG + 4G + I model of nucleotide evolution where the parameter of the G distribution, the proportion of invariable sites, and the transition/transversion ratio were estimated for each dataset. The confidence of each node was determined by assembling a consensus tree of 100 bootstrap replicates. Bootstrap values below 60% are not shown. The bar represents 1% estimated sequence divergence.



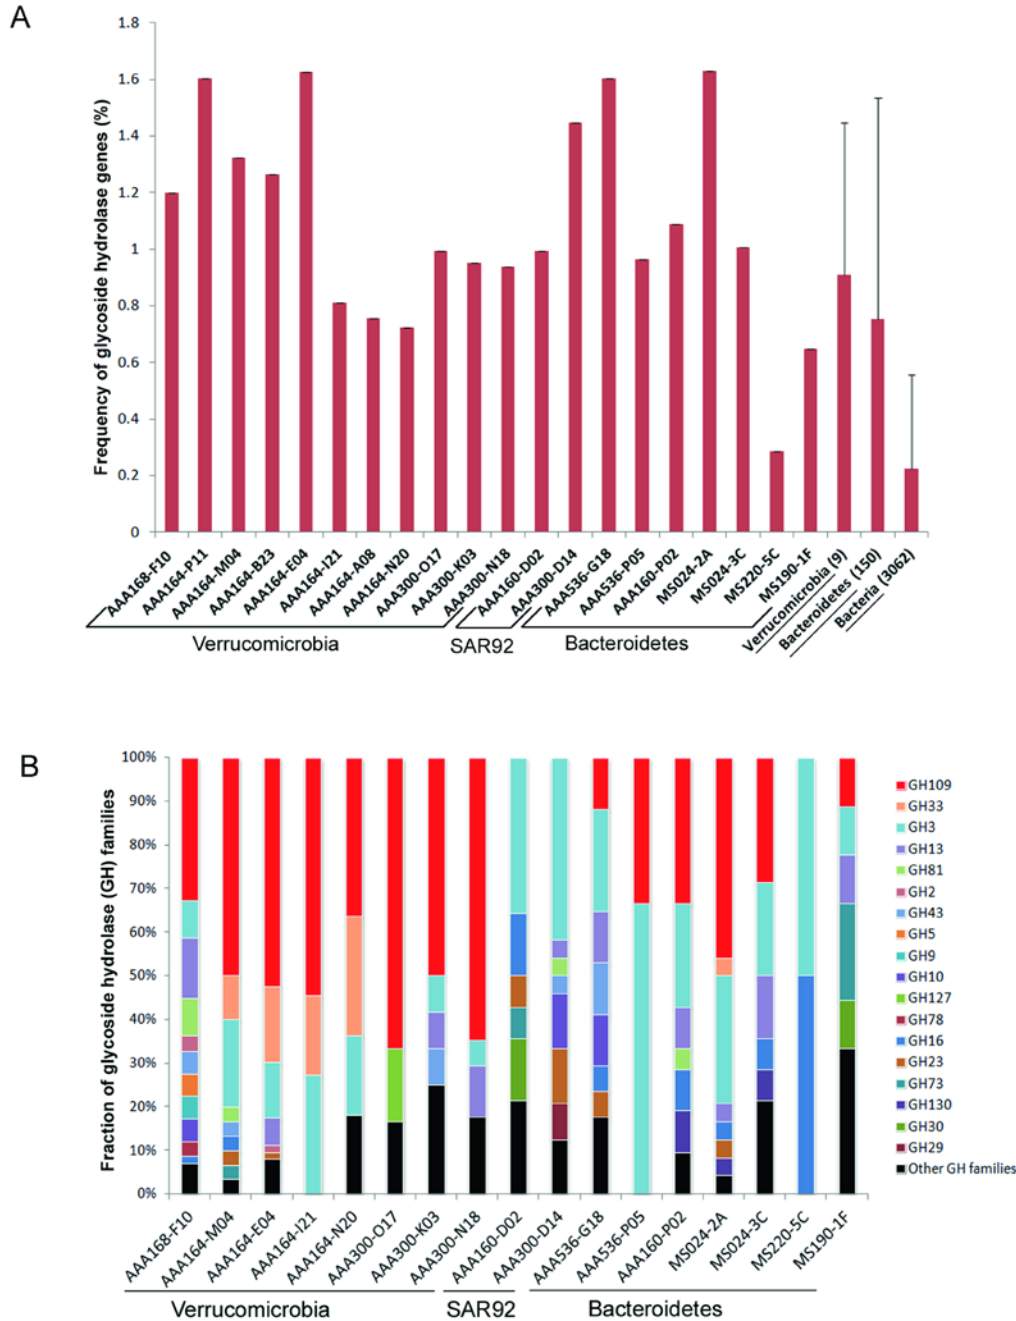

**Figure S5. Genomic comparison of glycoside hydrolases in those SAGs showing elevated frequency of genes encoding extracellular proteins.** Frequency of glycoside hydrolase genes involved in polysaccharide hydrolysis in Verrucomicrobia, Bacteroidetes and SAR92 SAG genomes (A). Frequency was estimated by dividing the total number of genes annotated as glycoside hydrolases by the total number of genes annotated. Bioinformatic resources of the Integrated Microbial Genomes (IMG) system were used to estimate the frequency of glycoside hydrolase (E.C. 3.2.1.x; see CAZy database (58) in the publicly available prokaryote genomes. Fraction of glycoside hydrolase (GH) families detected for each SAG (B). Fraction of the different GH families (according to nomenclature in CAZy database (58) was obtained by dividing the number of glycoside hydrolase genes belonging to a specific family by the total number of glycoside hydrolase genes annotated for each SAG. Glycoside hydrolase families were automatically annotated by CAZymes Analysis Toolkit applying the association rule learning algorithm (59) and then, the resulting annotation was carefully revised. Other GH families in figure legend are: 2, 17, 18, 20, 26, 31, 32, 65, 75, 84, 92, 94, 97, 103, 114 and 125.

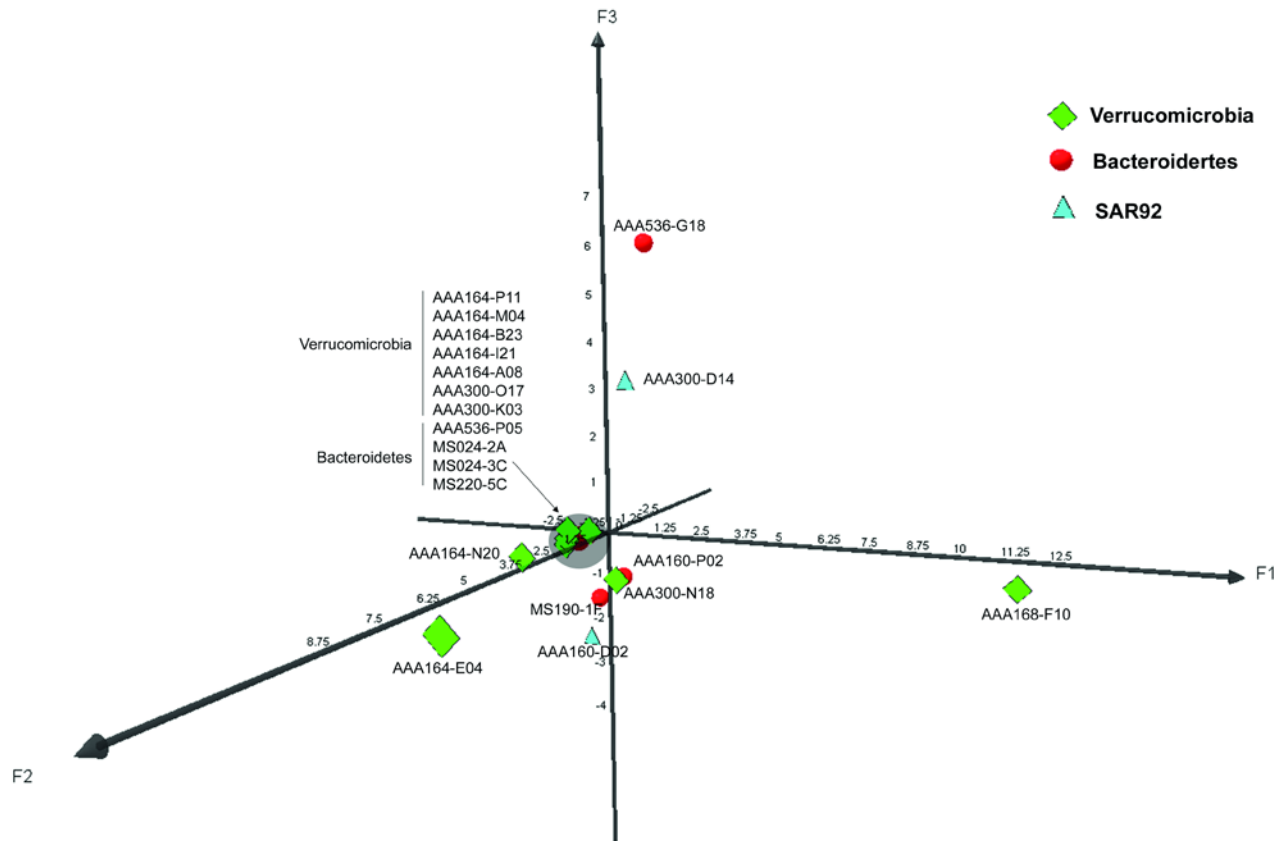

**Figure S6. Principal component analysis (PCA) of repertoire of glycoside hydrolases found in each SAG.** Data used for the PCA analysis is derived from Figure S4B.





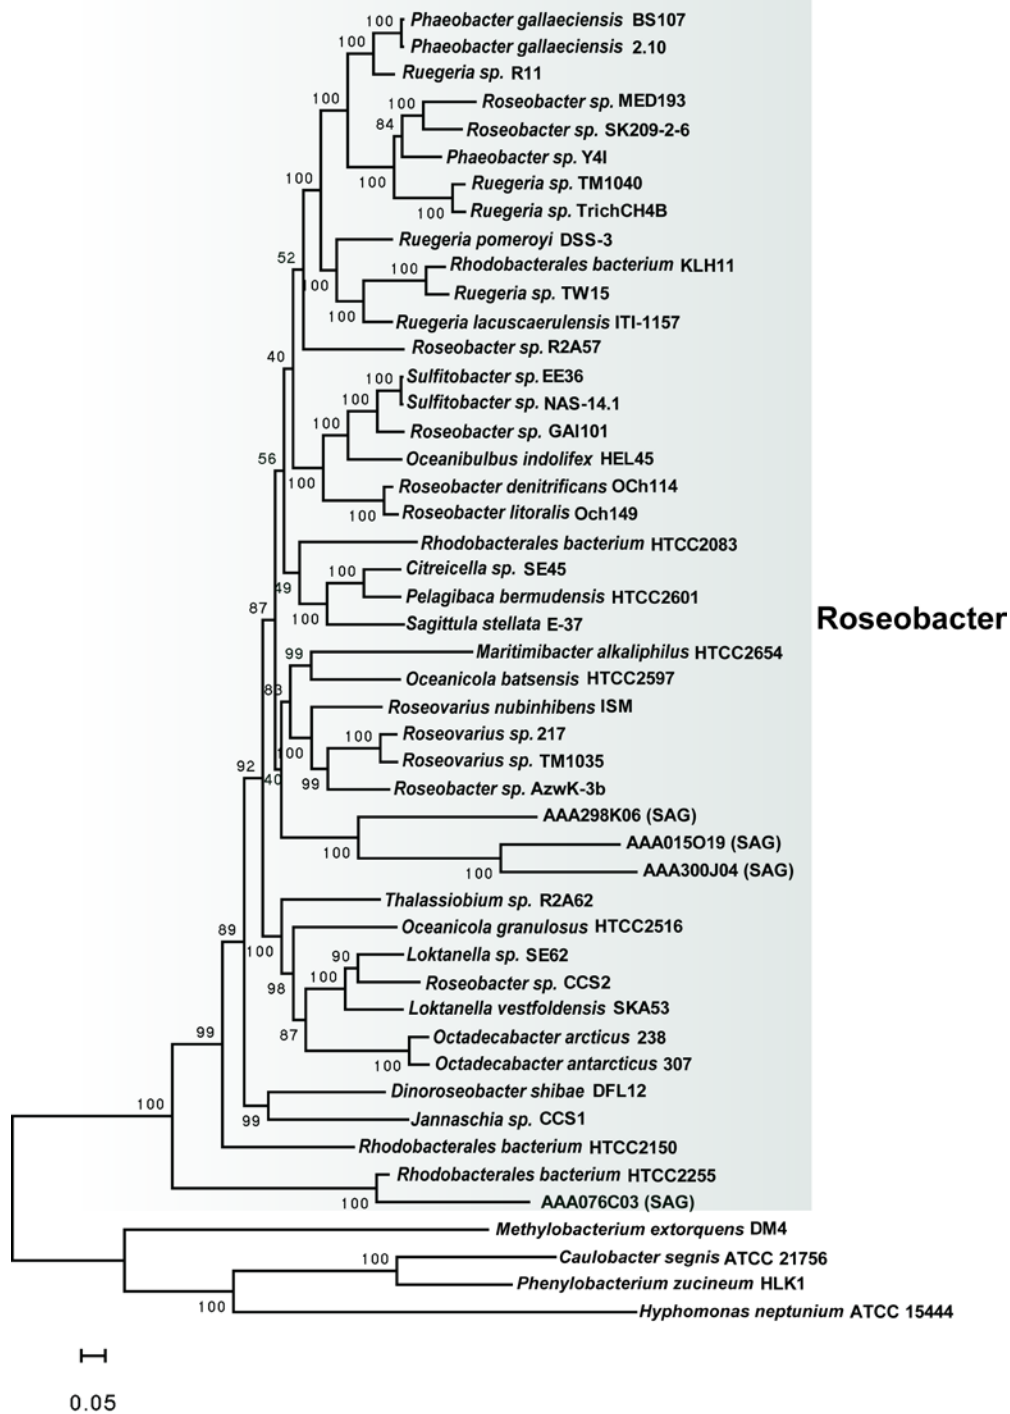

**Figure S8. Maximum likelihood phylogeny of the Roseobacter clade using 49 concatenated orthologous protein sequences.** The tree was constructed using RAxML 7.3.0 software with data partition model which allows each protein alignment to have its own evolutionary model. Values at the nodes show the number of times the clade defined by that node appeared in the 100 bootstrapped data sets. Grey shading indicates the Roseobacter clade. Tree is rooted using species associated with Rhizobiales, Hyphomonadaceae, and Caulobacterales. Although the branching order of several major clades is not resolved, the three SAGs (AAA298-K06, AAA015-O19, AAA300-J04) constitute a well-supported clade in which no cultured relatives are found.

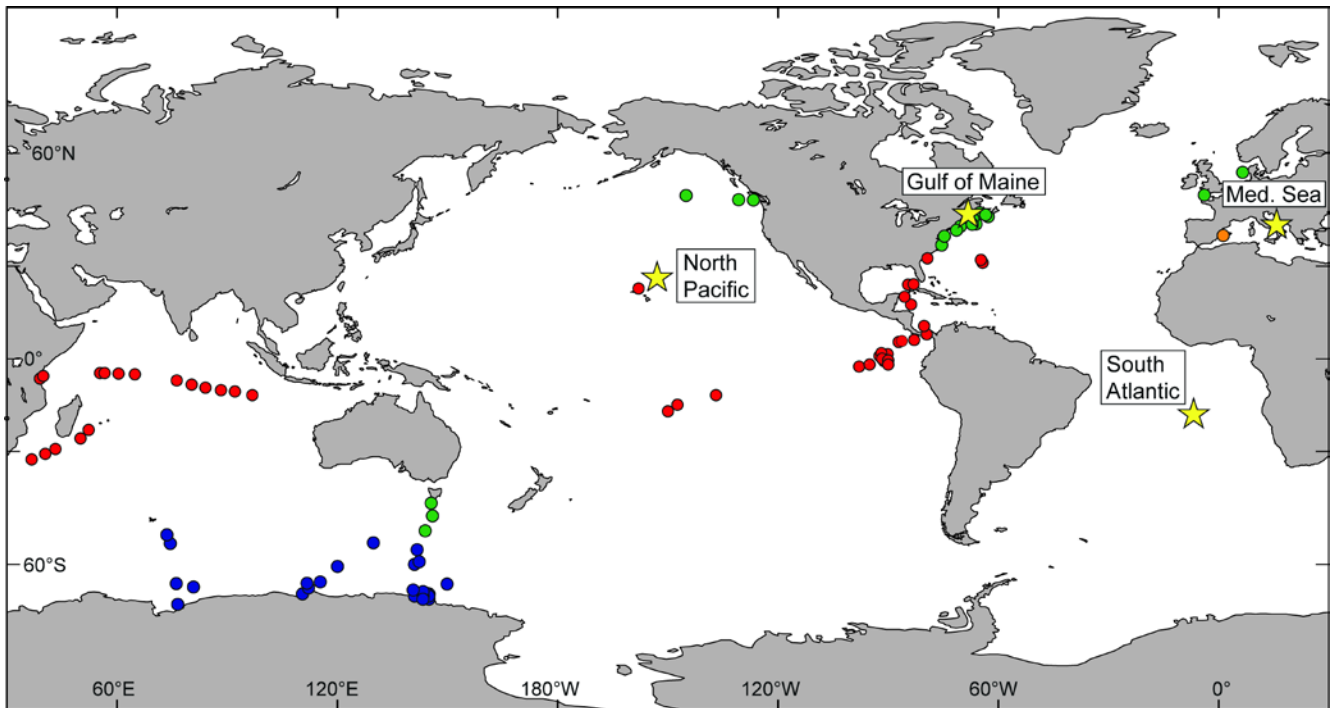

**Figure S9. SAG collection and metagenome sample locations.** Colored circles indicate locations and climate zone of metagenomes used for fragment recruitment, and stars represent the four SAG sampling locations. Red, tropical zone; blue, polar zone; green, temperate zone; orange, Mediterranean Sea.

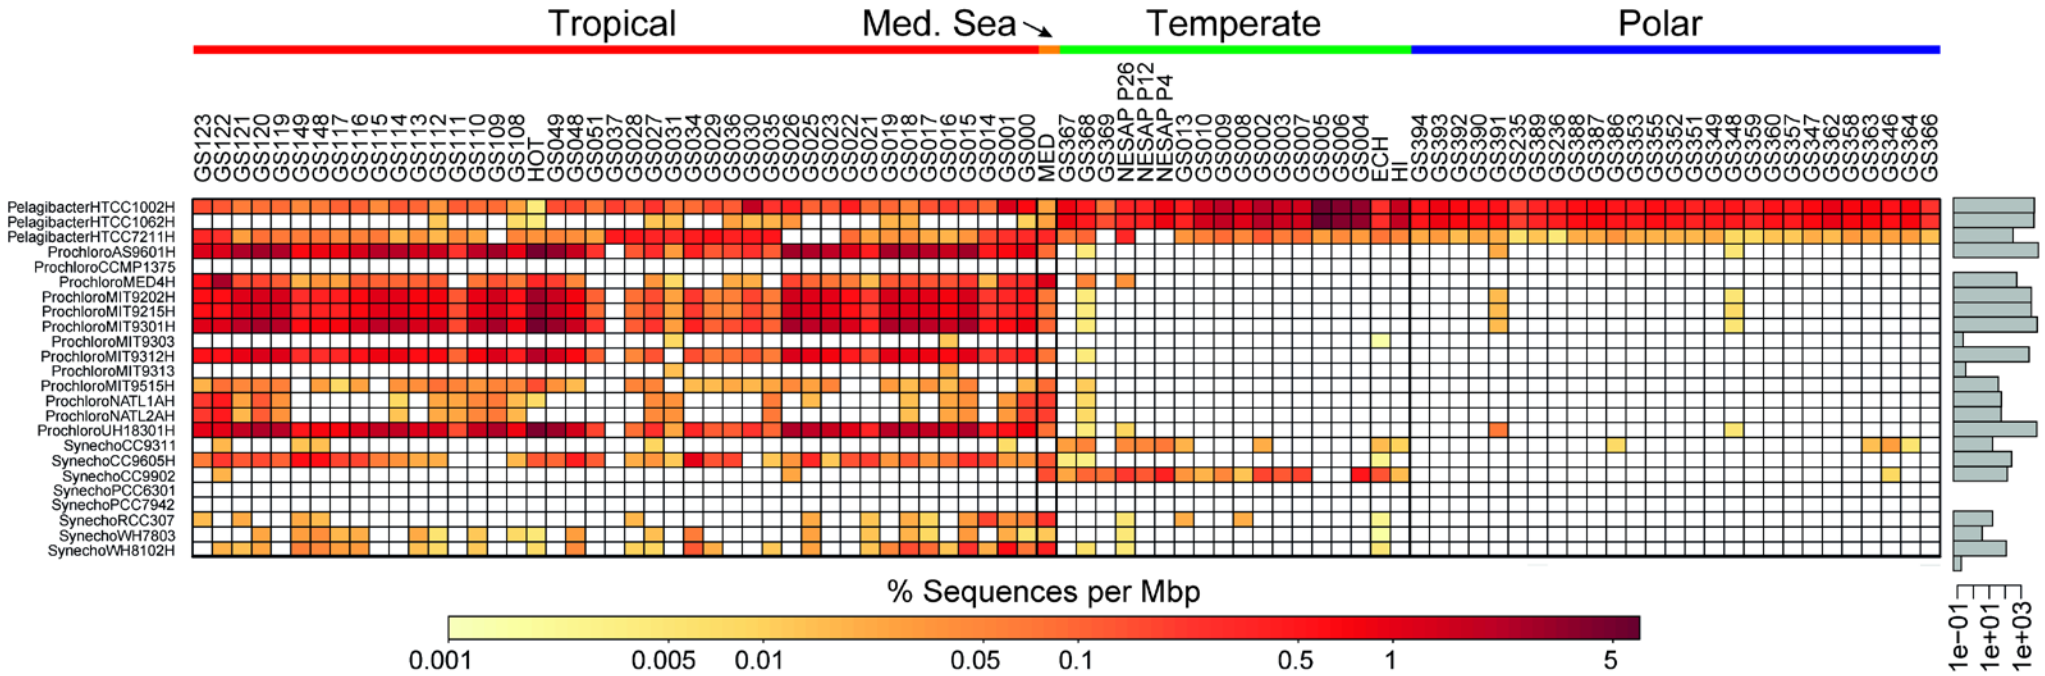

**Figure S10. Metagenome fragment recruitment of 24 PSP (*Prochlorococcus-Synechococcus-Pelagibacter*) cultures.** Fragment recruitment was carried out as described in Fig. 3. Percentages of aligned sequences from all metagenomes to individual SAGs are presented as grey bars on the y-axis. Metagenomes used in fragment recruitment are listed along the top x-axis, color bars indicate the surface ocean climate zone, and cultures are listed along the y-axis. HOT, HOT Station ALOHA; MED, Mediterranean Sea; NESAP, Northeast subarctic Pacific Ocean LineP stations; ECH, English Channel; HI, Helgoland Island.

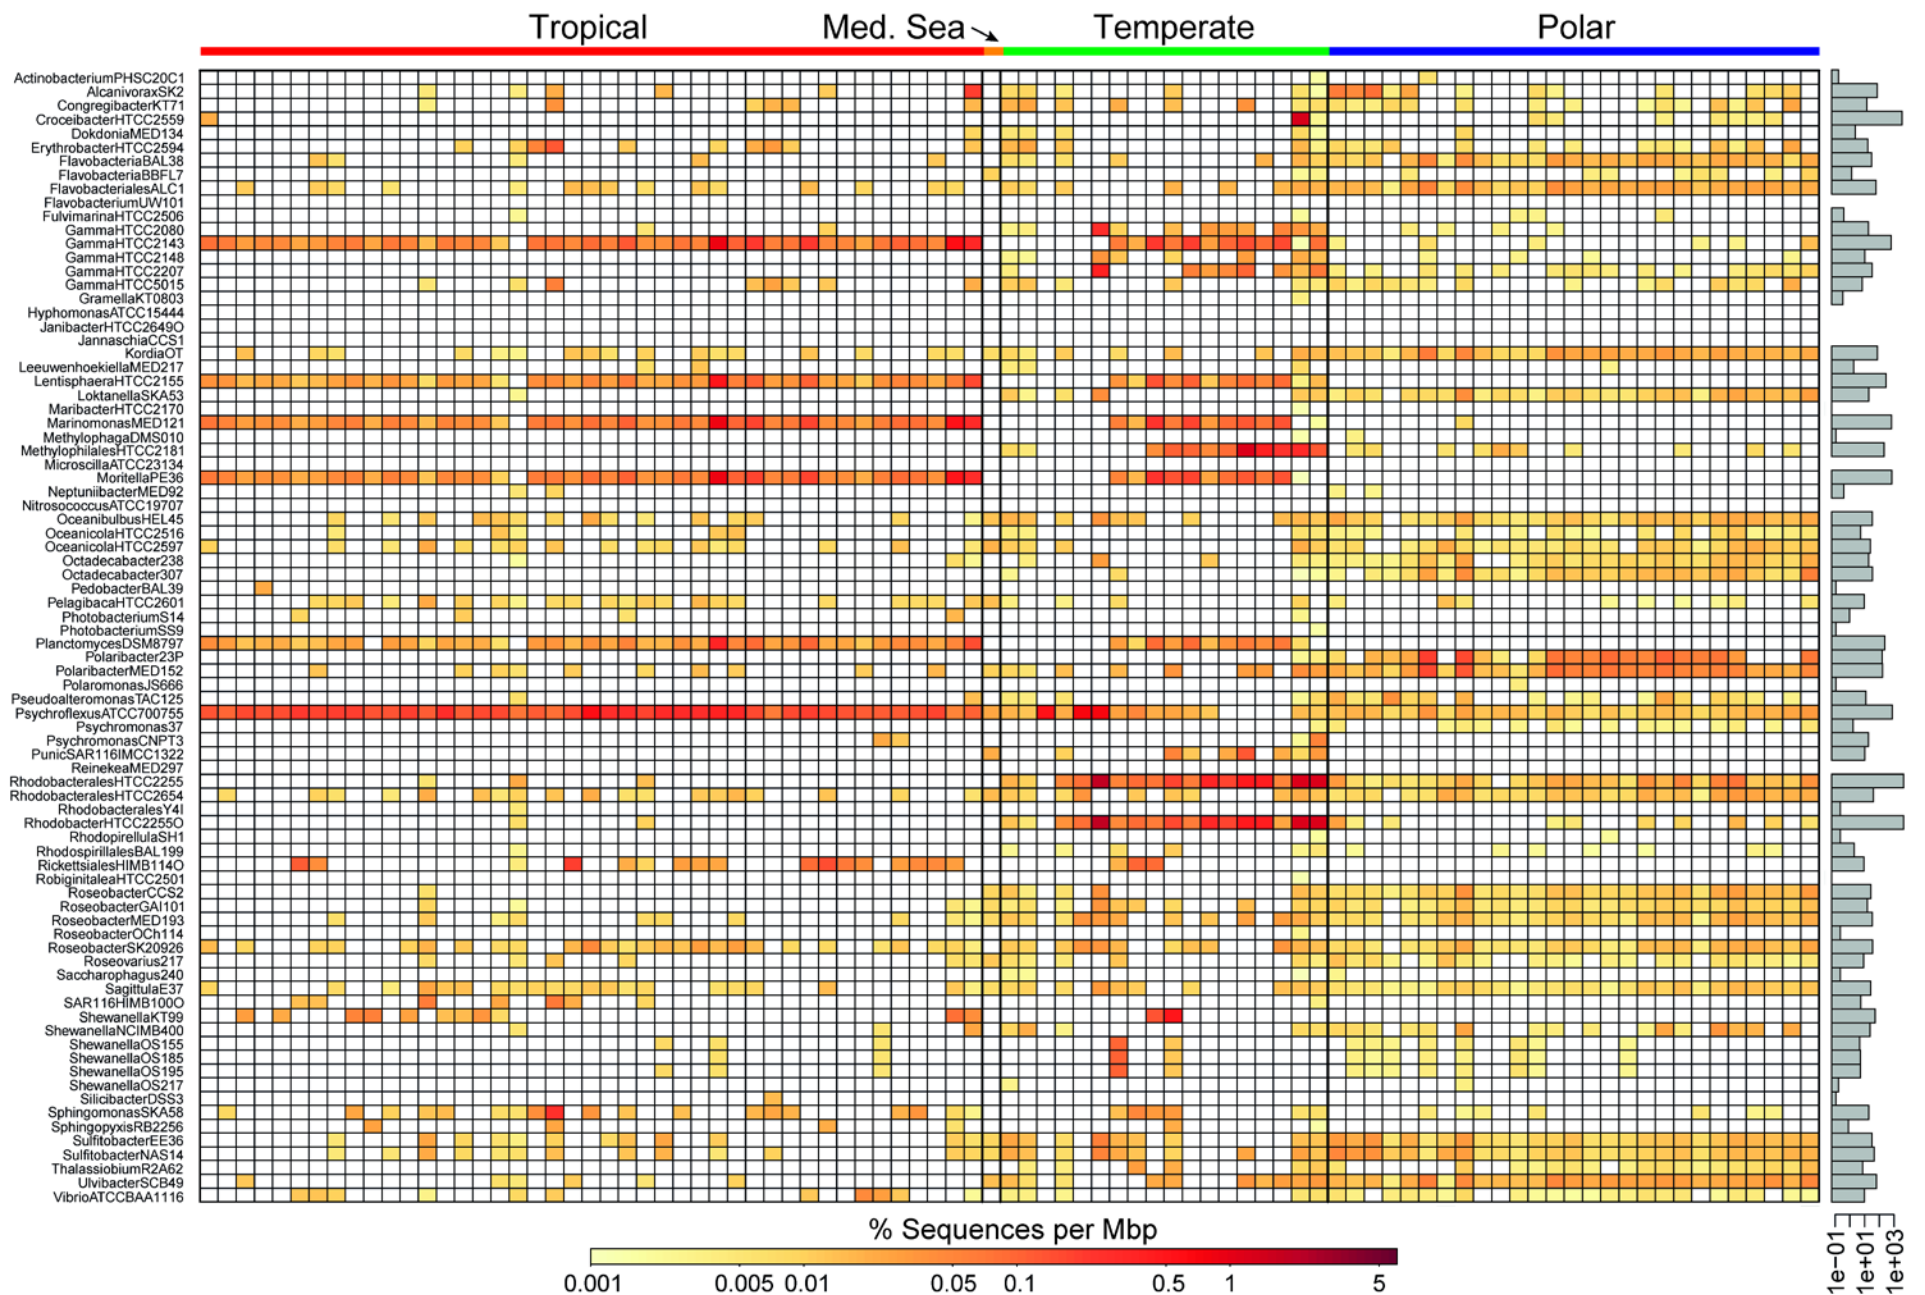

**Figure S11. Metagenome fragment recruitment of 82 marine cultures.** Fragment recruitment was carried out as described in Fig. 3. Percentages of aligned sequences from all metagenomes to individual SAGs are presented as grey bars on the y-axis. Cultures are listed along the y-axis and color bars indicating the surface ocean climate zone. Metagenomes are in the same order as presented in Fig. S10 along the top x-axis.

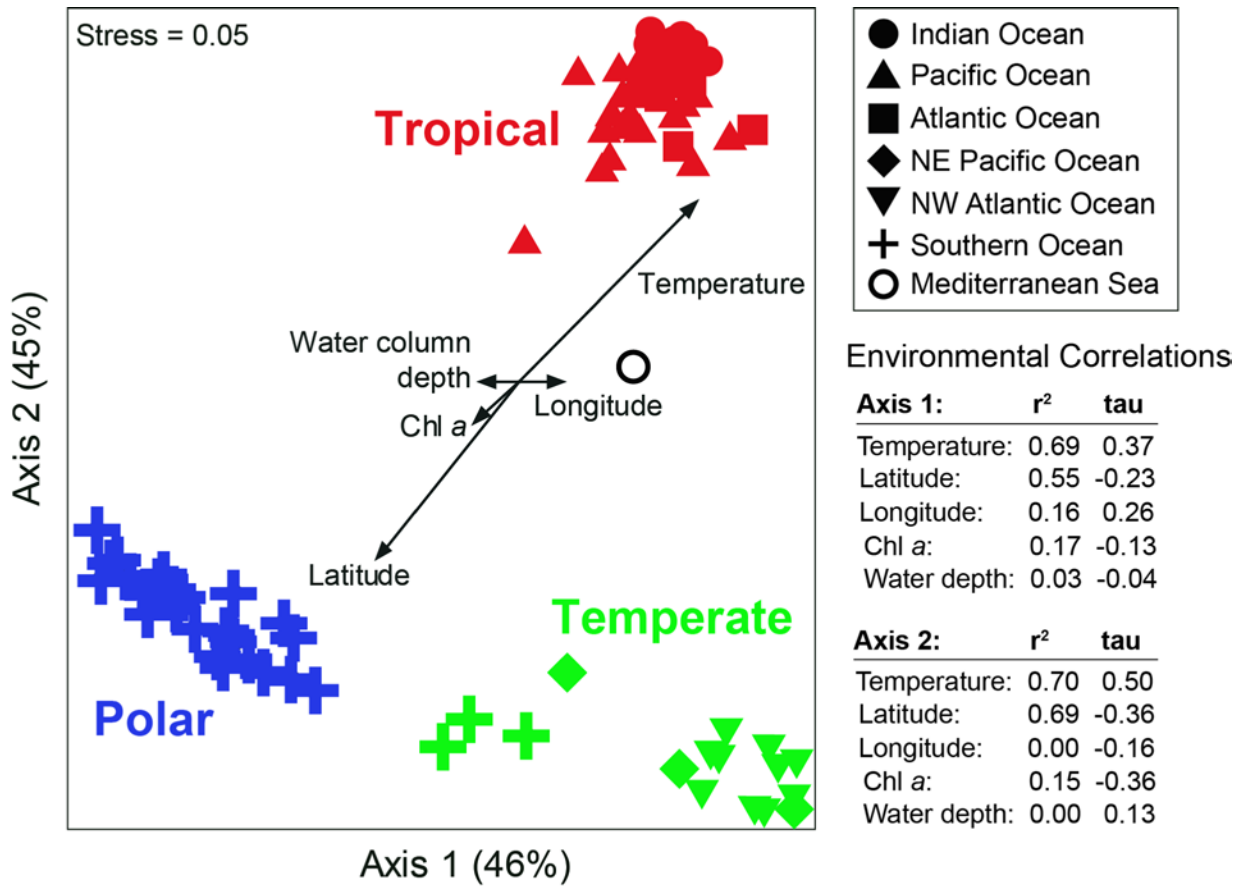

**Figure S12. Clustering of metagenomes from climatic zones as a function of SAG fragment recruitment.** Metagenome samples are colored by their climatic zone, and symbol shapes indicate geographic location. Non-metric multidimensional analysis was used to analyze Bray-Curtis dissimilarities of SAG recruitment abundances (arcsin square-root transformed). Pearson ( $r^2$ ) and Kendall ( $\tau$ ) correlation coefficients were calculated for each environmental parameter. Chl *a*, chlorophyll *a* concentration; water column depth, depth of water column at each sampling location.

**Table S1.** Sources of samples used for single amplified genome (SAG) generation. The Mediterranean Sea sample was collected at the deep chlorophyll *a* maximum. NA, not available; Verruco, Verrucomicrobia.

| Date                                                      | Latitude       | Longitude      | Depth (m) | T (°C) | S (PSU) | DO<br>(mL L <sup>-1</sup> ) | SAG labels                                     | Lineages                                                                                                                                 |
|-----------------------------------------------------------|----------------|----------------|-----------|--------|---------|-----------------------------|------------------------------------------------|------------------------------------------------------------------------------------------------------------------------------------------|
| <b>Gulf of Maine</b>                                      |                |                |           |        |         |                             |                                                |                                                                                                                                          |
| 03/28/06                                                  | 43°50'39.87" N | 69°38'27.49" W | 1         | 7.0    | 33.0    | NA                          | MS024<br>MS190<br>MS220                        | SAR116 (3)<br>Roseobacter (2)<br>SAR86 (4)                                                                                               |
| 08/16/09                                                  | 43°50'39.87" N | 69°38'27.49" W | 1         | 22.3   | 30.0    | NA                          | AAA076<br>AAA158<br>AAA160<br>AAA164<br>AAA168 | SAR92 (1)<br>Arctic96BD-19 (4)<br>Bacteroidetes (5)<br>Marine Group A (4)<br>Verruco-Verruco (8)<br>Verruco-S3 (4)<br>Thaumarchaeota (1) |
| <b>North Pacific subtropical gyre (HOT station ALOHA)</b> |                |                |           |        |         |                             |                                                |                                                                                                                                          |
| 09/09/09                                                  | 22°45'00" N    | 158°00'00" W   | 25        | 26.5   | 35.5    | 4.69                        | AAA298<br>AAA300                               | SAR116 (2)<br>Roseobacter (2)<br>SAR86 (1)<br>SAR92 (1)<br>Marine Group A (1)<br>Verruco-Opitutae (3)                                    |
| <b>South Atlantic subtropical gyre</b>                    |                |                |           |        |         |                             |                                                |                                                                                                                                          |
| 12/01/07                                                  | 12°29'41.40" S | 4°59'55.20" W  | 10        | 21.9   | 36.4    | 4.70                        | AAA015                                         | SAR116 (1)<br>Roseobacter (1)<br>Actinobacteria (2)                                                                                      |
| <b>Mediterranean Sea</b>                                  |                |                |           |        |         |                             |                                                |                                                                                                                                          |
| 11/18/09                                                  | 42°12'19.26" N | 17°42'50.46" E | 56        | 15.5   | 38.5    | NA                          | AAA536                                         | SAR116 (3)<br>SAR86 (2)<br>Bacteroidetes (2)                                                                                             |

**Table S2.** SAG sequencing and assembly characteristics. Verruco, Verrucomicrobia.

| SAG                                                       | Cluster         | Sequencing effort (Mbp) | No. of contigs | Assembly size (Mbp) | % Genome recovery | Estimated genome size (Mbp) | Protein coding genes | %GC  |
|-----------------------------------------------------------|-----------------|-------------------------|----------------|---------------------|-------------------|-----------------------------|----------------------|------|
| <b>Gulf of Maine</b>                                      |                 |                         |                |                     |                   |                             |                      |      |
| AAA158-B04                                                | SAR116          | 3,017.45                | 70             | 0.52                | 12.1              | 4.28                        | 547                  | 46.4 |
| AAA158-M15                                                | SAR116          | 2,734.96                | 52             | 0.40                | 13.8              | 2.92                        | 460                  | 31.1 |
| AAA160-J14                                                | SAR116          | 2,691.90                | 47             | 0.94                | 37.9              | 2.48                        | 799                  | 31.0 |
| AAA076-C03                                                | Roseobacter     | 3,029.55                | 107            | 2.00                | 67.2              | 2.97                        | 1988                 | 37.9 |
| AAA076-E06                                                | Roseobacter     | 2,962.94                | 23             | 0.22                | 1.7               | 12.77                       | 322                  | 38.1 |
| AAA076-P09                                                | SAR86           | 2,809.56                | 58             | 1.00                | 85.1              | 1.17                        | 1074                 | 33.3 |
| AAA076-P13                                                | SAR86           | 2,897.79                | 39             | 1.30                | 91.5              | 1.42                        | 1369                 | 33.6 |
| AAA168-I18                                                | SAR86           | 2,885.60                | 35             | 0.96                | 87.2              | 1.10                        | 1014                 | 32.5 |
| AAA168-P09                                                | SAR86           | 2,398.16                | 46             | 1.30                | 95.7              | 1.36                        | 1390                 | 33.0 |
| AAA160-D02                                                | SAR92           | 3,067.74                | 117            | 0.88                | 63.8              | 1.38                        | 904                  | 43.1 |
| AAA076-D02                                                | Arctic96BD-19   | 2,746.07                | 55             | 1.80                | 95.7              | 1.88                        | 1787                 | 38.1 |
| AAA076-D13                                                | Arctic96BD-19   | 2,782.59                | 81             | 1.70                | 87.2              | 1.95                        | 1730                 | 38.0 |
| AAA076-E13                                                | Arctic96BD-19   | 2,941.49                | 88             | 0.98                | 34.0              | 2.87                        | 1045                 | 37.3 |
| AAA076-F14                                                | Arctic96BD-19   | 2,643.54                | 48             | 1.80                | 93.6              | 1.92                        | 1788                 | 36.9 |
| MS024-2A                                                  | Bacteroidetes   | <sup>1</sup> 112.45     | 17             | 1.91                | 91.0              | 2.10                        | 1780                 | 36.0 |
| MS024-3C                                                  | Bacteroidetes   | <sup>1</sup> 130.72     | 21             | 1.52                | 78.0              | 1.95                        | 1388                 | 39.0 |
| MS190-1F                                                  | Bacteroidetes   | <sup>1</sup> 626.80     | 38             | 1.52                | 48.8              | 3.12                        | 1391                 | 36.1 |
| MS220-5C                                                  | Bacteroidetes   | <sup>1</sup> 537.10     | 22             | 0.71                | 19.8              | 3.59                        | 696                  | 39.4 |
| AAA160-P02                                                | Bacteroidetes   | 4,226.04                | 157            | 2.50                | 84.9              | 2.95                        | 2390                 | 31.6 |
| AAA076-M08                                                | Marine Group A  | 3,154.46                | 49             | 0.45                | 73.3              | 0.61                        | 513                  | 32.7 |
| AAA160-B08                                                | Marine Group A  | 2,102.06                | 47             | 0.94                | 84.4              | 1.11                        | 999                  | 33.1 |
| AAA160-C11                                                | Marine Group A  | 4,036.86                | 64             | 0.96                | 91.1              | 1.05                        | 1069                 | 32.6 |
| AAA160-I06                                                | Marine Group A  | 4,507.13                | 78             | 0.97                | 95.6              | 1.02                        | 1097                 | 32.6 |
| AAA164-A21                                                | Verruco-Verruco | 2,439.26                | 318            | 1.10                | 23.6              | 4.65                        | 1196                 | 48.6 |
| AAA164-B23                                                | Verruco-Verruco | 5,231.47                | 30             | 0.12                | 0.3               | 4.00                        | 158                  | 46.2 |
| AAA164-L15                                                | Verruco-Verruco | 3,974.62                | 225            | 2.50                | 50.0              | 5.00                        | 2222                 | 48.8 |
| AAA164-M04                                                | Verruco-Verruco | 4,204.91                | 282            | 2.50                | 53.0              | 4.71                        | 2308                 | 48.5 |
| AAA164-O14                                                | Verruco-Verruco | 4,335.31                | 522            | 3.30                | 61.5              | 5.36                        | 3117                 | 48.5 |
| AAA164-P11                                                | Verruco-Verruco | 4,286.52                | 49             | 0.29                | 5.2               | 5.56                        | 368                  | 49.7 |
| AAA168-E21                                                | Verruco-Verruco | 2,713.90                | 367            | 2.40                | 57.6              | 4.17                        | 2265                 | 48.6 |
| AAA168-F10                                                | Verruco-Verruco | 1,971.36                | 560            | 4.50                | 58.2              | 7.73                        | 4057                 | 47.3 |
| AAA164-A08                                                | Verruco-S3      | 4,187.21                | 15             | 0.09                | 0.9               | 9.87                        | 132                  | 37.3 |
| AAA164-E04                                                | Verruco-S3      | 3,008.07                | 506            | 4.10                | 74.9              | 5.48                        | 3776                 | 47.5 |
| AAA164-I21                                                | Verruco-S3      | 3,947.13                | 389            | 1.10                | 29.7              | 3.70                        | 1341                 | 46.0 |
| AAA164-N20                                                | Verruco-S3      | 3,552.69                | 461            | 1.40                | 36.7              | 3.82                        | 1638                 | 45.8 |
| <b>North Pacific subtropical gyre (HOT station ALOHA)</b> |                 |                         |                |                     |                   |                             |                      |      |
| AAA300-B11                                                | SAR116          | 4,558.86                | 51             | 0.18                | 0.0               | NA                          | 230                  | 44.4 |
| AAA300-J16                                                | SAR116          | 8,454.80                | 214            | 1.00                | 31.0              | 3.22                        | 1181                 | 45.4 |
| AAA298-K06                                                | Roseobacter     | 4,069.72                | 231            | 1.70                | 39.7              | 4.29                        | 1931                 | 39.9 |
| AAA300-J04                                                | Roseobacter     | 4,123.54                | 77             | 0.62                | 22.4              | 2.77                        | 688                  | 39.1 |

| SAG                                    | Cluster           | Sequencing effort (Mbp) | No. of contigs | Assembly size (Mbp) | % Genome recovery | Estimated genome size (Mbp) | Protein coding genes | %GC  |
|----------------------------------------|-------------------|-------------------------|----------------|---------------------|-------------------|-----------------------------|----------------------|------|
| AAA298-N10                             | SAR86             | 2,183.29                | 189            | 1.00                | 87.2              | 1.15                        | 1197                 | 32.9 |
| AAA300-D14                             | SAR92             | 2,604.59                | 154            | 1.50                | 83.0              | 1.81                        | 1449                 | 38.0 |
| AAA298-D23                             | Marine Group A    | 5,060.55                | 50             | 1.00                | 97.8              | 1.02                        | 1081                 | 31.9 |
| AAA300-K03                             | Verruco-Opirituae | 2,603.89                | 182            | 1.20                | 38.8              | 3.09                        | 1243                 | 43.0 |
| AAA300-N18                             | Verruco-Opirituae | 2,423.84                | 260            | 1.70                | 49.4              | 3.44                        | 1685                 | 43.8 |
| AAA300-O17                             | Verruco-Opirituae | 2,551.41                | 203            | 1.10                | 41.8              | 2.63                        | 1192                 | 43.2 |
| <b>South Atlantic subtropical gyre</b> |                   |                         |                |                     |                   |                             |                      |      |
| AAA015-N04                             | SAR116            | 3,538.14                | 132            | 1.70                | 69.0              | 2.46                        | 1894                 | 30.8 |
| AAA015-O19                             | Roseobacter       | 6,383.59                | 159            | 1.70                | 44.8              | 3.79                        | 1861                 | 38.5 |
| AAA015-D07                             | Actinobacteria    | 3,943.43                | 42             | 0.63                | 31.7              | 1.99                        | 710                  | 32.3 |
| AAA015-M09                             | Actinobacteria    | 2,635.47                | 67             | 0.67                | 61.7              | 1.08                        | 773                  | 34.2 |
| <b>Mediterranean Sea</b>               |                   |                         |                |                     |                   |                             |                      |      |
| AAA536-B06                             | SAR116            | 7,329.83                | 182            | 1.60                | 63.8              | 2.51                        | 1754                 | 41.3 |
| AAA536-G10                             | SAR116            | 2,144.80                | 148            | 2.20                | 91.4              | 2.41                        | 2303                 | 30.8 |
| AAA536-K22                             | SAR116            | 1,609.29                | 92             | 2.00                | 75.9              | 2.64                        | 2150                 | 31.6 |
| AAA536-J20                             | SAR86             | 2,136.24                | 94             | 0.36                | 17.0              | 2.10                        | 448                  | 33.0 |
| AAA536-N21                             | SAR86             | 2,005.02                | 47             | 0.44                | 70.2              | 0.62                        | 483                  | 32.9 |
| AAA536-G18                             | Bacteroidetes     | 3,891.41                | 137            | 1.20                | 52.3              | 2.30                        | 1246                 | 31.2 |
| AAA536-P05                             | Bacteroidetes     | 3,427.22                | 55             | 0.26                | 48.1              | 3.21                        | 311                  | 38.6 |

<sup>1</sup>Sanger and 454, or combined with Illumina sequencing was employed for these SAGs, and these were not used in the averages and ranges presented.

|                |             |        |           |          |            |           |           |
|----------------|-------------|--------|-----------|----------|------------|-----------|-----------|
| <b>Average</b> | 3,445.52    | 149    | 1.32      | 55.4     | 3.10       | 1,356     | 38.6      |
| <b>Range</b>   | 1,609-8,455 | 15-560 | 0.09-4.50 | 0.3-97.8 | 0.61-12.77 | 132-4,057 | 30.8-49.7 |



**Table S3.** Genome characteristics used to compare marine cultures and SAGs with PCA. GC content and non-coding DNA percentages were extracted from IMG. Protein localization category values “Multi”, “Cytoplasmic”, “Cytoplasmic membrane”, “Periplasmic”, “Outer membrane”, and “Extracellular” were calculated according to Lauro et al. (60). The frequency of COG categories T (Signal transduction mechanisms), V (Defense mechanism), K (Transcription), Q (Secondary metabolites biosynthesis, transport and catabolism), and I (Lipid transport and metabolism) were also calculated according to Lauro et al. (60).

| Genome                                  | %GC  | % Non-coding DNA | Multi   | Cytoplasmic | Cytoplasmic membrane | Periplasmic | Outer membrane | Extracellular | T       | V       | K       | Q       | I       |
|-----------------------------------------|------|------------------|---------|-------------|----------------------|-------------|----------------|---------------|---------|---------|---------|---------|---------|
| Alcanivorax_borkumensis_SK2             | 54.7 | 12.0             | 0.02613 | 0.48566     | 0.22323              | 0.01887     | 0.02142        | 0.00690       | 0.04869 | 0.01069 | 0.05899 | 0.02890 | 0.05740 |
| Candidatus_Pelagibacter_HTCC7211        | 29.0 | 8.0              | 0.02350 | 0.56531     | 0.19074              | 0.01797     | 0.00553        | 0.00829       | 0.02186 | 0.00859 | 0.02888 | 0.02810 | 0.03981 |
| Candidatus_Pelagibacter_ubique_HTCC1002 | 29.0 | 4.1              | 0.02010 | 0.55779     | 0.19239              | 0.01292     | 0.00861        | 0.00431       | 0.01997 | 0.00915 | 0.03577 | 0.02829 | 0.04409 |
| Candidatus_Pelagibacter_ubique_HTCC1062 | 29.7 | 3.9              | 0.01625 | 0.56721     | 0.19719              | 0.01403     | 0.00960        | 0.00517       | 0.02068 | 0.00910 | 0.03639 | 0.03226 | 0.04301 |
| Candidatus_Pumiceispirillum_IMCC1322    | 48.9 | 10.1             | 0.02123 | 0.46716     | 0.22021              | 0.02241     | 0.00590        | 0.01022       | 0.02356 | 0.00873 | 0.04756 | 0.03272 | 0.03709 |
| Congregibacter_KT71                     | 57.7 | 10.3             | 0.03426 | 0.44177     | 0.20655              | 0.01599     | 0.02208        | 0.00787       | 0.04127 | 0.01651 | 0.05175 | 0.03873 | 0.05460 |
| Croceibacter_atlanticus_HTCC2559        | 33.9 | 8.2              | 0.03163 | 0.43472     | 0.18647              | 0.00993     | 0.03935        | 0.01912       | 0.03350 | 0.01483 | 0.05656 | 0.03075 | 0.04887 |
| Dokdonia_MED134                         | 37.3 | 8.5              | 0.03736 | 0.42833     | 0.19192              | 0.00883     | 0.04008        | 0.01291       | 0.04420 | 0.01872 | 0.06188 | 0.02236 | 0.03900 |
| Erythrobacter_litoralis_HTCC2594        | 63.1 | 8.5              | 0.03188 | 0.45799     | 0.18931              | 0.01827     | 0.02192        | 0.00565       | 0.03751 | 0.01236 | 0.04817 | 0.04646 | 0.07246 |
| Flavobacteria_bacterium_BAL38           | 31.5 | 8.4              | 0.03331 | 0.45176     | 0.17841              | 0.00919     | 0.03522        | 0.01953       | 0.02947 | 0.01842 | 0.04665 | 0.02026 | 0.04052 |
| Flavobacteria_bacterium_BBFL7           | 35.4 | 9.4              | 0.04784 | 0.46682     | 0.18017              | 0.00810     | 0.03858        | 0.02199       | 0.04293 | 0.02118 | 0.05037 | 0.02576 | 0.04408 |
| Flavobacteriales_ALC1                   | 32.7 | 7.3              | 0.05515 | 0.42409     | 0.19390              | 0.00697     | 0.04122        | 0.02206       | 0.04942 | 0.02751 | 0.07226 | 0.02611 | 0.03357 |
| Flavobacteriales_HTCC2170               | 37.0 | 9.0              | 0.04140 | 0.45457     | 0.18516              | 0.01121     | 0.03249        | 0.00920       | 0.03359 | 0.02153 | 0.06029 | 0.02670 | 0.04048 |
| Flavobacterium_johnsoniae_UW101         | 34.1 | 12.2             | 0.03588 | 0.43911     | 0.16006              | 0.01495     | 0.04405        | 0.01515       | 0.06204 | 0.02026 | 0.07787 | 0.03197 | 0.04115 |
| Fulvimarina_pelagi                      | 61.1 | 12.6             | 0.02877 | 0.43021     | 0.21364              | 0.02318     | 0.00719        | 0.00773       | 0.04082 | 0.00745 | 0.05118 | 0.03110 | 0.03758 |
| Gamma_HTCC2080                          | 52.0 | 10.0             | 0.03422 | 0.45840     | 0.19906              | 0.02009     | 0.02229        | 0.01005       | 0.03235 | 0.01209 | 0.04301 | 0.06114 | 0.08745 |
| Gamma_HTCC2143                          | 47.2 | 18.0             | 0.02430 | 0.45112     | 0.19033              | 0.01502     | 0.01666        | 0.00737       | 0.04310 | 0.01852 | 0.04151 | 0.05364 | 0.08301 |
| Gamma_HTCC2148                          | 53.0 | 11.3             | 0.03057 | 0.47557     | 0.18160              | 0.01516     | 0.02430        | 0.00784       | 0.03674 | 0.01464 | 0.05287 | 0.06183 | 0.08871 |
| Gamma_HTCC2207                          | 49.4 | 12.0             | 0.02471 | 0.50461     | 0.18467              | 0.01298     | 0.02052        | 0.01089       | 0.02989 | 0.01087 | 0.05480 | 0.03623 | 0.06114 |
| Gamma_HTCC5015                          | 54.1 | 13.0             | 0.02725 | 0.47987     | 0.19317              | 0.01139     | 0.02277        | 0.01179       | 0.05634 | 0.01207 | 0.05634 | 0.02565 | 0.04728 |
| Gramella_forsetii_KT0803                | 36.6 | 9.2              | 0.04241 | 0.46261     | 0.18331              | 0.00865     | 0.02930        | 0.00809       | 0.04187 | 0.01763 | 0.05333 | 0.02909 | 0.04187 |
| Hypomonas_neptunium_ATCC_15444          | 61.9 | 9.5              | 0.03110 | 0.42967     | 0.20114              | 0.01598     | 0.02397        | 0.00942       | 0.03568 | 0.01634 | 0.06669 | 0.04368 | 0.06469 |
| Jannaschia_CCS1                         | 62.3 | 9.2              | 0.02802 | 0.43894     | 0.23091              | 0.02031     | 0.00584        | 0.00724       | 0.03214 | 0.00783 | 0.07406 | 0.04136 | 0.04584 |
| Kordia_algicida_OT-1                    | 34.3 | 11.6             | 0.04231 | 0.40297     | 0.15995              | 0.00820     | 0.02658        | 0.01949       | 0.05693 | 0.01969 | 0.06849 | 0.03425 | 0.03467 |
| Leeuwenhoekella_blandensis_MED217       | 40.0 | 9.0              | 0.04016 | 0.43079     | 0.18340              | 0.01285     | 0.04257        | 0.00857       | 0.03916 | 0.02267 | 0.05565 | 0.02391 | 0.03504 |
| Lentisphaera_araenosa_HTCC2155          | 41.0 | 11.3             | 0.05741 | 0.43907     | 0.13636              | 0.01509     | 0.01038        | 0.01078       | 0.05571 | 0.01354 | 0.07695 | 0.01754 | 0.02555 |
| Loktanella_vestfoldensis_SKA53          | 59.8 | 8.1              | 0.02347 | 0.42797     | 0.23533              | 0.01956     | 0.00652        | 0.00945       | 0.03496 | 0.00977 | 0.05752 | 0.03609 | 0.04774 |
| Marinomonas_MED121                      | 40.8 | 12.3             | 0.02178 | 0.45539     | 0.20602              | 0.02075     | 0.01307        | 0.00830       | 0.08019 | 0.00700 | 0.10773 | 0.02778 | 0.03478 |
| Methylophaga_DSM010                     | 46.9 | 11.1             | 0.01766 | 0.44285     | 0.18461              | 0.02166     | 0.01966        | 0.00467       | 0.06548 | 0.01233 | 0.05315 | 0.01658 | 0.02679 |
| Methylophilales_bacterium_HTCC2181      | 38.0 | 5.0              | 0.02317 | 0.56726     | 0.17115              | 0.01570     | 0.01644        | 0.00598       | 0.02278 | 0.01058 | 0.03743 | 0.01871 | 0.03417 |
| Microscilla_marina_ATCC23134            | 40.8 | 18.0             | 0.02560 | 0.32179     | 0.14725              | 0.00841     | 0.02176        | 0.02320       | 0.10237 | 0.03026 | 0.09884 | 0.03177 | 0.03833 |
| Moritella_PE36                          | 41.0 | 13.2             | 0.01924 | 0.39239     | 0.23552              | 0.02301     | 0.02343        | 0.01380       | 0.06455 | 0.01281 | 0.08094 | 0.02126 | 0.03125 |
| Nitrosococcus_oceani_ATCC_19707         | 50.0 | 15.0             | 0.02320 | 0.46039     | 0.22207              | 0.01690     | 0.01525        | 0.00862       | 0.04529 | 0.02141 | 0.03664 | 0.02223 | 0.02923 |
| Oceanibulbus_indolifex                  | 60.0 | 10.6             | 0.02504 | 0.41849     | 0.22177              | 0.02745     | 0.00698        | 0.00674       | 0.04385 | 0.00717 | 0.06907 | 0.03726 | 0.04586 |
| Oceanicola_batsensis                    | 66.2 | 10.8             | 0.03205 | 0.48433     | 0.20655              | 0.01994     | 0.00712        | 0.00736       | 0.02935 | 0.00866 | 0.06596 | 0.04807 | 0.07323 |
| Oceanicola_granulosus                   | 70.2 | 8.5              | 0.04341 | 0.46764     | 0.22610              | 0.02716     | 0.00666        | 0.00879       | 0.03357 | 0.00816 | 0.06622 | 0.03840 | 0.04264 |
| Oceanospirillum_sp_MED92                | 46.6 | 8.9              | 0.02467 | 0.49295     | 0.22451              | 0.01871     | 0.01220        | 0.00759       | 0.10688 | 0.00829 | 0.07310 | 0.02488 | 0.03563 |
| Octadecabacter_238                      | 50.8 | 18.2             | 0.01166 | 0.38721     | 0.14724              | 0.01423     | 0.00291        | 0.00566       | 0.02363 | 0.00716 | 0.05107 | 0.02983 | 0.03508 |
| Octadecabacter_307                      | 57.8 | 16.6             | 0.01565 | 0.35632     | 0.17307              | 0.01856     | 0.00437        | 0.00637       | 0.02569 | 0.00823 | 0.05661 | 0.03392 | 0.03915 |
| Pedobacter_BAL39                        | 45.2 | 9.2              | 0.02607 | 0.37436     | 0.18405              | 0.01725     | 0.04567        | 0.00764       | 0.08993 | 0.02060 | 0.08819 | 0.02901 | 0.03800 |
| Photobacterium_angustum_S14             | 38.3 | 14.8             | 0.01865 | 0.41553     | 0.24133              | 0.02479     | 0.01975        | 0.01316       | 0.05288 | 0.01511 | 0.07983 | 0.01864 | 0.02896 |
| Photobacterium_profundum_SS9            | 41.2 | 17.2             | 0.02186 | 0.41847     | 0.22554              | 0.02368     | 0.01840        | 0.00929       | 0.05734 | 0.01788 | 0.07826 | 0.02093 | 0.02703 |
| Planctomyces_maris_DSM8797              | 49.7 | 12.8             | 0.04367 | 0.36929     | 0.17037              | 0.01543     | 0.00725        | 0.00972       | 0.06189 | 0.01882 | 0.06874 | 0.03793 | 0.03451 |
| Polaribacter_irgensii_23-P              | 34.8 | 12.9             | 0.01760 | 0.44310     | 0.18224              | 0.00860     | 0.03246        | 0.00665       | 0.02989 | 0.01614 | 0.06097 | 0.02271 | 0.04124 |
| Polaribacter_MED152                     | 30.6 | 6.9              | 0.03919 | 0.47294     | 0.17581              | 0.00672     | 0.04143        | 0.01157       | 0.03738 | 0.01264 | 0.05992 | 0.02364 | 0.04508 |
| Polaromonas_JS666                       | 62.5 | 12.4             | 0.02219 | 0.42032     | 0.20576              | 0.04273     | 0.00935        | 0.00568       | 0.04657 | 0.00927 | 0.08112 | 0.03877 | 0.04888 |
| Prochlorococcus_marinus_AS9601          | 31.3 | 8.8              | 0.01510 | 0.46226     | 0.19313              | 0.00364     | 0.00677        | 0.00312       | 0.01801 | 0.01488 | 0.03211 | 0.02662 | 0.03211 |
| Prochlorococcus_marinus_CCMP1375        | 36.4 | 10.8             | 0.01593 | 0.42804     | 0.20393              | 0.00584     | 0.00637        | 0.00425       | 0.02147 | 0.01610 | 0.03374 | 0.02224 | 0.03221 |

| Genome                                | %GC  | % Non-coding DNA | Multi   | Cytoplasmic | Cytoplasmic membrane | Periplasmic | Outer membrane | Extracellular | T       | V       | K       | Q       | I       |
|---------------------------------------|------|------------------|---------|-------------|----------------------|-------------|----------------|---------------|---------|---------|---------|---------|---------|
| Prochlorococcus_marinus_MED4          | 30.8 | 11.6             | 0.01514 | 0.49330     | 0.19045              | 0.00582     | 0.00641        | 0.00349       | 0.02062 | 0.01427 | 0.03410 | 0.02379 | 0.03172 |
| Prochlorococcus_marinus_MIT_9215      | 31.1 | 10.4             | 0.01412 | 0.45436     | 0.18507              | 0.00403     | 0.00555        | 0.00353       | 0.01845 | 0.01384 | 0.03228 | 0.02613 | 0.03305 |
| Prochlorococcus_marinus_MIT_9301      | 31.3 | 8.8              | 0.01311 | 0.45779     | 0.18773              | 0.00420     | 0.00734        | 0.00210       | 0.01947 | 0.01324 | 0.03505 | 0.02414 | 0.03193 |
| Prochlorococcus_marinus_MIT_9303      | 50.0 | 15.5             | 0.01168 | 0.29997     | 0.20354              | 0.01001     | 0.00934        | 0.00934       | 0.02630 | 0.01520 | 0.03974 | 0.03507 | 0.02864 |
| Prochlorococcus_marinus_MIT_9312      | 31.2 | 10.4             | 0.01768 | 0.48729     | 0.19282              | 0.00552     | 0.00829        | 0.00552       | 0.02103 | 0.01324 | 0.03271 | 0.02492 | 0.03349 |
| Prochlorococcus_marinus_MIT_9515      | 30.8 | 11.1             | 0.01522 | 0.44911     | 0.19832              | 0.00525     | 0.00577        | 0.00315       | 0.02034 | 0.01330 | 0.03208 | 0.02739 | 0.03286 |
| Prochlorococcus_marinus_MIT9313       | 50.7 | 17.8             | 0.01587 | 0.37241     | 0.22829              | 0.01454     | 0.00705        | 0.00441       | 0.02792 | 0.01923 | 0.04156 | 0.02792 | 0.02730 |
| Prochlorococcus_marinus_NATL1A        | 35.1 | 12.7             | 0.01322 | 0.39444     | 0.19745              | 0.00502     | 0.00456        | 0.00319       | 0.02347 | 0.01287 | 0.03482 | 0.02725 | 0.03028 |
| Prochlorococcus_marinus_NATL2A        | 35.0 | 14.4             | 0.01268 | 0.45455     | 0.19979              | 0.00740     | 0.00793        | 0.00529       | 0.02221 | 0.01302 | 0.03446 | 0.02680 | 0.03063 |
| Pseudoalteromonas_haloplanktis_TAC125 | 40.2 | 11.6             | 0.02438 | 0.41595     | 0.22002              | 0.01922     | 0.03127        | 0.00947       | 0.06254 | 0.01345 | 0.06826 | 0.02555 | 0.04338 |
| Psychroflexus_ATCC700755              | 32.8 | 14.5             | 0.02518 | 0.40898     | 0.15168              | 0.00785     | 0.02118        | 0.01555       | 0.03222 | 0.02562 | 0.04617 | 0.03196 | 0.04820 |
| Psychromonas_CNPT3                    | 38.6 | 14.2             | 0.01907 | 0.44334     | 0.22956              | 0.02127     | 0.01870        | 0.00807       | 0.04915 | 0.00991 | 0.05989 | 0.01735 | 0.02230 |
| Psychromonas_ingrahamii_37            | 40.1 | 21.2             | 0.01354 | 0.45388     | 0.24062              | 0.02454     | 0.01326        | 0.01241       | 0.05589 | 0.01092 | 0.06232 | 0.02217 | 0.02377 |
| Reinekea_MED297                       | 52.2 | 9.9              | 0.02265 | 0.42473     | 0.23478              | 0.02336     | 0.01156        | 0.01321       | 0.08560 | 0.01263 | 0.08111 | 0.02273 | 0.03452 |
| Rhodobacterales_HTCC2654              | 38.0 | 11.0             | 0.02377 | 0.44270     | 0.19822              | 0.01868     | 0.00531        | 0.00764       | 0.03196 | 0.00778 | 0.07310 | 0.04586 | 0.06476 |
| Rhodobacterales_Y4I                   | 67.8 | 13.8             | 0.02420 | 0.43963     | 0.19913              | 0.02541     | 0.00968        | 0.00871       | 0.05071 | 0.01217 | 0.07447 | 0.03999 | 0.04173 |
| Rhodospirillum_baltica_SH1            | 55.4 | 5.0              | 0.03932 | 0.28287     | 0.15372              | 0.01078     | 0.00491        | 0.00846       | 0.06406 | 0.02156 | 0.06621 | 0.03141 | 0.03234 |
| Rhodospirillales_BAL199               | 65.0 | 15.0             | 0.02252 | 0.45692     | 0.18424              | 0.01942     | 0.00669        | 0.00979       | 0.03699 | 0.00861 | 0.05794 | 0.05598 | 0.04463 |
| Robiginitalea_biformata_HTCC2501      | 55.3 | 8.1              | 0.04926 | 0.45942     | 0.19207              | 0.00898     | 0.02912        | 0.00960       | 0.03613 | 0.02159 | 0.05162 | 0.02863 | 0.04411 |
| Roseobacter_CC52                      | 55.2 | 9.0              | 0.02186 | 0.40000     | 0.22951              | 0.02186     | 0.00820        | 0.01093       | 0.03305 | 0.00964 | 0.06575 | 0.03029 | 0.04406 |
| Roseobacter_denitrificans_OCh_114     | 59.0 | 10.6             | 0.02398 | 0.43134     | 0.22185              | 0.02930     | 0.00751        | 0.00751       | 0.03632 | 0.01307 | 0.06479 | 0.03544 | 0.04213 |
| Roseobacter_GAI101                    | 59.0 | 15.0             | 0.01856 | 0.44421     | 0.22103              | 0.02641     | 0.00857        | 0.00928       | 0.04028 | 0.00946 | 0.06002 | 0.04731 | 0.05515 |
| Roseobacter_MED193                    | 57.5 | 10.9             | 0.02029 | 0.43484     | 0.20750              | 0.02271     | 0.00617        | 0.00728       | 0.04092 | 0.00969 | 0.08318 | 0.04226 | 0.05357 |
| Roseobacter_SK209-2-6                 | 57.0 | 11.2             | 0.01763 | 0.45669     | 0.19771              | 0.02226     | 0.00882        | 0.00617       | 0.04162 | 0.00779 | 0.08969 | 0.03759 | 0.04431 |
| Roseovarius_217                       | 61.1 | 9.8              | 0.02368 | 0.43671     | 0.21563              | 0.02619     | 0.00775        | 0.00775       | 0.03669 | 0.00904 | 0.07649 | 0.04083 | 0.04910 |
| Roseovarius_HTCC2601                  | 66.5 | 11.3             | 0.02696 | 0.42920     | 0.22084              | 0.02806     | 0.00752        | 0.00844       | 0.03495 | 0.00754 | 0.07423 | 0.04043 | 0.04500 |
| Saccharophagus_degradans_2-40         | 45.8 | 13.0             | 0.03343 | 0.38423     | 0.20734              | 0.02221     | 0.03069        | 0.02720       | 0.08411 | 0.01289 | 0.07154 | 0.02514 | 0.03029 |
| Sagittula_stellata                    | 64.9 | 11.7             | 0.02566 | 0.44188     | 0.21591              | 0.02743     | 0.00632        | 0.00710       | 0.04228 | 0.00874 | 0.07204 | 0.04086 | 0.04771 |
| SAR116_HIMB100                        | 50.5 | 8.1              | 0.02399 | 0.47772     | 0.20523              | 0.02228     | 0.00557        | 0.01200       | 0.01731 | 0.00655 | 0.03789 | 0.04537 | 0.05472 |
| SAR86C                                | 32.8 | 6.4              | 0.01328 | 0.45863     | 0.15015              | 0.00613     | 0.02145        | 0.00409       | 0.00857 | 0.02938 | 0.03550 | 0.03060 | 0.07099 |
| SAR86D                                | 31.5 | 11.2             | 0.01728 | 0.47290     | 0.14925              | 0.01257     | 0.01100        | 0.00393       | 0.00683 | 0.01463 | 0.04780 | 0.03610 | 0.06927 |
| SAR86E                                | 36.2 | 6.3              | 0.02584 | 0.56066     | 0.16798              | 0.00933     | 0.02441        | 0.00431       | 0.01180 | 0.01101 | 0.03619 | 0.05980 | 0.09127 |
| Shewanella_baltica_OS155              | 46.3 | 15.6             | 0.02540 | 0.41301     | 0.22611              | 0.02718     | 0.02428        | 0.01225       | 0.07071 | 0.01729 | 0.07252 | 0.02065 | 0.02994 |
| Shewanella_baltica_OS185              | 46.3 | 15.3             | 0.02777 | 0.39099     | 0.23009              | 0.03004     | 0.02777        | 0.01161       | 0.07423 | 0.01748 | 0.07800 | 0.02179 | 0.02959 |
| Shewanella_baltica_OS195              | 46.3 | 15.1             | 0.02858 | 0.38588     | 0.22099              | 0.03029     | 0.02816        | 0.01237       | 0.07398 | 0.01474 | 0.07708 | 0.02173 | 0.02845 |
| Shewanella_denitrificans_OS217        | 45.1 | 14.6             | 0.03010 | 0.40783     | 0.21417              | 0.02318     | 0.02291        | 0.02025       | 0.07011 | 0.01332 | 0.06631 | 0.02538 | 0.03236 |
| Shewanella_frigidimarina_NCIMB_400    | 41.6 | 14.8             | 0.02457 | 0.41201     | 0.23951              | 0.02556     | 0.02805        | 0.01092       | 0.06885 | 0.01439 | 0.06913 | 0.02511 | 0.03640 |
| Shewanella_KT99                       | 46.0 | 16.9             | 0.02007 | 0.38465     | 0.19339              | 0.01700     | 0.01983        | 0.00826       | 0.05963 | 0.01461 | 0.05993 | 0.02087 | 0.03488 |
| Silicibacter_pomeroyi_DSS-3           | 64.2 | 9.8              | 0.02893 | 0.48236     | 0.21731              | 0.03034     | 0.00776        | 0.00635       | 0.03154 | 0.01156 | 0.08830 | 0.04442 | 0.05125 |
| Sphingomonas_SKA58                    | 62.5 | 9.5              | 0.02351 | 0.38886     | 0.19520              | 0.02708     | 0.02657        | 0.00613       | 0.04466 | 0.01235 | 0.06335 | 0.03801 | 0.05353 |
| Sphingopyxis_alaskensis_RB2256        | 65.5 | 9.4              | 0.03818 | 0.43505     | 0.19280              | 0.01972     | 0.02441        | 0.00626       | 0.03849 | 0.00990 | 0.06452 | 0.04289 | 0.06525 |
| Sulfitobacter_sp_EE36                 | 60.3 | 9.0              | 0.02303 | 0.43638     | 0.22337              | 0.02763     | 0.01036        | 0.00691       | 0.03433 | 0.00990 | 0.06504 | 0.03830 | 0.05612 |
| Sulfitobacter_sp_NAS141               | 60.0 | 10.0             | 0.02196 | 0.43311     | 0.21227              | 0.02726     | 0.00984        | 0.00707       | 0.03284 | 0.00874 | 0.06870 | 0.03616 | 0.04640 |
| Synechococcus_CC9311                  | 52.4 | 12.8             | 0.01487 | 0.32365     | 0.22891              | 0.00864     | 0.00692        | 0.00795       | 0.03306 | 0.01322 | 0.04242 | 0.03306 | 0.03085 |
| Synechococcus_CC9605                  | 59.2 | 13.1             | 0.01323 | 0.36106     | 0.20870              | 0.01134     | 0.00378        | 0.00378       | 0.02887 | 0.01414 | 0.03889 | 0.02534 | 0.02534 |
| Synechococcus_CC9902                  | 54.2 | 10.0             | 0.02037 | 0.39489     | 0.21630              | 0.00867     | 0.00477        | 0.00564       | 0.02556 | 0.01434 | 0.04052 | 0.02805 | 0.02930 |
| Synechococcus_elongatus_PCC_6301      | 55.5 | 12.0             | 0.01662 | 0.38702     | 0.28097              | 0.01504     | 0.00435        | 0.00791       | 0.05189 | 0.01455 | 0.04413 | 0.02473 | 0.02085 |
| Synechococcus_elongatus_PCC_7942      | 55.5 | 10.8             | 0.01615 | 0.37716     | 0.27536              | 0.01503     | 0.00488        | 0.00864       | 0.05165 | 0.01483 | 0.04495 | 0.02439 | 0.02104 |
| Synechococcus_RCC307                  | 60.8 | 5.8              | 0.01460 | 0.32702     | 0.23511              | 0.01420     | 0.00473        | 0.00552       | 0.02839 | 0.01419 | 0.04258 | 0.02957 | 0.02839 |
| Synechococcus_sp_WH8102               | 59.4 | 9.7              | 0.01866 | 0.38547     | 0.20365              | 0.00913     | 0.00476        | 0.00635       | 0.02850 | 0.01513 | 0.04072 | 0.03083 | 0.02734 |
| Synechococcus_WH_7803                 | 60.2 | 6.6              | 0.02053 | 0.35452     | 0.23885              | 0.01579     | 0.00513        | 0.00632       | 0.03164 | 0.01525 | 0.03898 | 0.02768 | 0.02881 |
| Thalassobium_R2A62                    | 55.2 | 10.0             | 0.01893 | 0.41915     | 0.20092              | 0.02109     | 0.00649        | 0.00946       | 0.03150 | 0.01004 | 0.05884 | 0.03219 | 0.04119 |
| Ulvibacter_SCB49                      | 34.0 | 10.4             | 0.03494 | 0.41757     | 0.18725              | 0.00611     | 0.03596        | 0.01357       | 0.04247 | 0.02043 | 0.05538 | 0.02312 | 0.04301 |
| Vibrio_harveyi_ATCC_BAA-1116          | 45.5 | 14.0             | 0.01784 | 0.39141     | 0.18960              | 0.02164     | 0.01932        | 0.01470       | 0.05646 | 0.01489 | 0.07135 | 0.01934 | 0.02378 |
| AAA076C03                             | 37.9 | 7.2              | 0.02162 | 0.52640     | 0.20362              | 0.02061     | 0.00654        | 0.00553       | 0.02474 | 0.00895 | 0.05000 | 0.03158 | 0.04211 |
| AAA160J14                             | 31.0 | 7.6              | 0.01121 | 0.48941     | 0.17061              | 0.00996     | 0.00498        | 0.00623       | 0.02340 | 0.01248 | 0.02340 | 0.06240 | 0.09204 |
| AAA076P09                             | 33.3 | 3.8              | 0.02249 | 0.52484     | 0.16963              | 0.01218     | 0.02437        | 0.00375       | 0.01564 | 0.01564 | 0.02682 | 0.02793 | 0.06704 |
| AAA076P13                             | 43.1 | 7.3              | 0.02214 | 0.54686     | 0.17491              | 0.01402     | 0.02509        | 0.00295       | 0.01444 | 0.01274 | 0.03229 | 0.03568 | 0.06797 |

| Genome    | %GC  | % Non-coding DNA | Multi   | Cytoplasmic | Cytoplasmic membrane | Periplasmic | Outer membrane | Extracellular | T       | V       | K       | Q       | I       |
|-----------|------|------------------|---------|-------------|----------------------|-------------|----------------|---------------|---------|---------|---------|---------|---------|
| AAA168I18 | 32.5 | 4.1              | 0.01876 | 0.57256     | 0.16782              | 0.01086     | 0.02073        | 0.00296       | 0.01019 | 0.01246 | 0.03511 | 0.02605 | 0.07475 |
| AAA168P09 | 33.0 | 4.5              | 0.02321 | 0.54170     | 0.17549              | 0.00870     | 0.01813        | 0.00580       | 0.01373 | 0.01288 | 0.03519 | 0.03176 | 0.06953 |
| AAA160D02 | 48.8 | 8.0              | 0.02137 | 0.49719     | 0.16873              | 0.01350     | 0.02587        | 0.02362       | 0.02304 | 0.01626 | 0.04743 | 0.01084 | 0.02846 |
| AAA076D02 | 38.1 | 5.7              | 0.01811 | 0.57159     | 0.20374              | 0.01868     | 0.00170        | 0.00566       | 0.01478 | 0.00887 | 0.03548 | 0.03548 | 0.04258 |
| AAA076D13 | 38.0 | 5.8              | 0.01983 | 0.54169     | 0.20875              | 0.01691     | 0.00466        | 0.00583       | 0.01673 | 0.01053 | 0.03532 | 0.02664 | 0.04027 |
| AAA076E13 | 37.3 | 5.9              | 0.01927 | 0.54335     | 0.18882              | 0.01445     | 0.00385        | 0.00674       | 0.01505 | 0.01183 | 0.03226 | 0.03333 | 0.03333 |
| AAA076F14 | 36.9 | 5.5              | 0.01925 | 0.57644     | 0.20102              | 0.01755     | 0.00340        | 0.00566       | 0.01524 | 0.00879 | 0.03751 | 0.03048 | 0.04279 |
| AAA160P02 | 31.6 | 7.7              | 0.02894 | 0.44128     | 0.16946              | 0.00755     | 0.03440        | 0.01552       | 0.02941 | 0.01726 | 0.04987 | 0.03005 | 0.04923 |
| MS0242A   | 36.1 | 14.9             | 0.03233 | 0.47286     | 0.17898              | 0.00924     | 0.03406        | 0.00808       | 0.01699 | 0.01467 | 0.03629 | 0.02934 | 0.05019 |
| MS0243C   | 35.7 | 6.1              | 0.02305 | 0.45279     | 0.18736              | 0.01041     | 0.02825        | 0.01115       | 0.02004 | 0.01603 | 0.04910 | 0.02505 | 0.03607 |
| MS1901F   | 39.4 | 6.4              | 0.03153 | 0.42342     | 0.14790              | 0.01126     | 0.03529        | 0.00901       | 0.02104 | 0.01733 | 0.04455 | 0.02599 | 0.04208 |
| MS2205C   | 29.0 | 8.0              | 0.03418 | 0.47548     | 0.17088              | 0.01189     | 0.02080        | 0.02377       | 0.02607 | 0.00948 | 0.03791 | 0.03791 | 0.03791 |
| AAA160B08 | 33.1 | 3.7              | 0.01816 | 0.50050     | 0.21090              | 0.01312     | 0.02119        | 0.01009       | 0.00653 | 0.01436 | 0.03133 | 0.02350 | 0.07180 |
| AAA160C11 | 32.6 | 3.6              | 0.02547 | 0.47642     | 0.17547              | 0.01038     | 0.02170        | 0.01604       | 0.00927 | 0.01457 | 0.02649 | 0.02649 | 0.06358 |
| AAA160I06 | 32.6 | 3.3              | 0.02319 | 0.48887     | 0.19017              | 0.01206     | 0.01948        | 0.01206       | 0.00963 | 0.01564 | 0.03490 | 0.03008 | 0.06980 |
| AAA164E04 | 47.5 | 10.0             | 0.03104 | 0.43485     | 0.14628              | 0.01291     | 0.00922        | 0.00953       | 0.03014 | 0.02160 | 0.03918 | 0.03918 | 0.03064 |
| AAA164L15 | 48.6 | 8.3              | 0.03748 | 0.44477     | 0.09911              | 0.01874     | 0.01824        | 0.02071       | 0.01933 | 0.02285 | 0.04482 | 0.02109 | 0.03427 |
| AAA164M04 | 48.5 | 8.5              | 0.03832 | 0.43567     | 0.09981              | 0.01088     | 0.01608        | 0.01798       | 0.01243 | 0.01865 | 0.04707 | 0.01954 | 0.02753 |
| AAA164O14 | 48.5 | 8.2              | 0.04355 | 0.41791     | 0.09990              | 0.01417     | 0.01590        | 0.02005       | 0.01786 | 0.01323 | 0.04431 | 0.02315 | 0.03307 |
| AAA168E21 | 39.9 | 8.1              | 0.03707 | 0.43220     | 0.10878              | 0.01512     | 0.01317        | 0.01805       | 0.02946 | 0.01733 | 0.04853 | 0.02600 | 0.03553 |
| AAA168F10 | 47.3 | 8.1              | 0.04166 | 0.43264     | 0.12391              | 0.01371     | 0.02188        | 0.02267       | 0.02089 | 0.01778 | 0.04622 | 0.02267 | 0.02978 |
| AAA536B06 | 30.8 | 6.7              | 0.02397 | 0.43559     | 0.18933              | 0.02277     | 0.00839        | 0.00419       | 0.01806 | 0.00650 | 0.03035 | 0.03468 | 0.04335 |
| AAA536G10 | 38.7 | 6.6              | 0.01253 | 0.51015     | 0.17840              | 0.01512     | 0.00950        | 0.00821       | 0.02186 | 0.00661 | 0.02745 | 0.04728 | 0.07219 |
| AAA536K22 | 31.6 | 7.1              | 0.01438 | 0.50788     | 0.17904              | 0.01623     | 0.00928        | 0.00928       | 0.01939 | 0.00862 | 0.02800 | 0.04900 | 0.06947 |
| AAA536G18 | 31.2 | 4.7              | 0.04130 | 0.45263     | 0.16275              | 0.00648     | 0.04211        | 0.02672       | 0.02005 | 0.01128 | 0.04010 | 0.02381 | 0.05013 |
| AAA298K06 | 45.4 | 16.6             | 0.01961 | 0.49285     | 0.16799              | 0.01908     | 0.00530        | 0.00901       | 0.02089 | 0.00633 | 0.03734 | 0.03291 | 0.05063 |
| AAA300J16 | 30.8 | 6.9              | 0.01625 | 0.36733     | 0.14711              | 0.01895     | 0.00632        | 0.01986       | 0.03937 | 0.00919 | 0.04068 | 0.06562 | 0.04331 |
| AAA298N10 | 32.9 | 3.4              | 0.02423 | 0.52715     | 0.17293              | 0.01170     | 0.02339        | 0.00835       | 0.01515 | 0.01515 | 0.03333 | 0.03636 | 0.06869 |
| AAA300D14 | 38.0 | 5.3              | 0.02861 | 0.57582     | 0.13662              | 0.01359     | 0.02575        | 0.01288       | 0.01932 | 0.01208 | 0.03543 | 0.04348 | 0.07246 |
| AAA298D23 | 31.9 | 2.9              | 0.02146 | 0.51213     | 0.18470              | 0.00933     | 0.02705        | 0.00840       | 0.00847 | 0.01332 | 0.03390 | 0.02179 | 0.06053 |
| AAA300K03 | 43.0 | 5.9              | 0.02500 | 0.50268     | 0.13393              | 0.00625     | 0.01964        | 0.01161       | 0.02153 | 0.01615 | 0.04441 | 0.03499 | 0.02423 |
| AAA300N18 | 43.8 | 5.7              | 0.03119 | 0.49104     | 0.13006              | 0.00995     | 0.01725        | 0.01725       | 0.02037 | 0.02342 | 0.03157 | 0.02546 | 0.02953 |
| AAA300O17 | 43.2 | 6.4              | 0.03474 | 0.47887     | 0.12113              | 0.00563     | 0.01502        | 0.01596       | 0.02453 | 0.01587 | 0.03608 | 0.03608 | 0.03319 |
| AAA015O19 | 38.5 | 7.3              | 0.01964 | 0.52209     | 0.16530              | 0.01691     | 0.00818        | 0.00764       | 0.02366 | 0.00872 | 0.03238 | 0.04421 | 0.07098 |
| AAA015N04 | 33.6 | 3.9              | 0.01263 | 0.50105     | 0.17316              | 0.02105     | 0.00684        | 0.00947       | 0.02257 | 0.00976 | 0.02441 | 0.05552 | 0.07810 |

**Table S4.** Pairwise percent SSU rRNA gene similarities between SAGs and taxonomically related cultures.

| IMG ID     | Culture                                                    | SAG                           |                  |                  |                  |                  |                  |
|------------|------------------------------------------------------------|-------------------------------|------------------|------------------|------------------|------------------|------------------|
|            |                                                            | <b>Bacteroidetes (80-95%)</b> | <b>AAA536G18</b> | <b>AAA160P02</b> | <b>MS0242A</b>   | <b>MS0243C</b>   | <b>MS1901F</b>   |
| 648028020  | <i>Croceibacter atlanticus</i><br>HTCC2559                 | 89                            | 88               | 87               | 90               | 82               | 84               |
| 638341059  | <i>Dokdonia</i> MED134                                     | 90                            | 90               | 90               | 90               | 82               | 84               |
| 640612204  | Flavobacteria bacterium<br>BAL38                           | 89                            | 89               | 90               | 89               | 81               | 85               |
| 638341093  | Flavobacteria bacterium<br>BBFL7                           | 88                            | 87               | 85               | 89               | 81               | 82               |
| 641380439  | Flavobacteriales ALC1                                      | 92                            | 92               | 90               | 91               | 83               | 84               |
| 648028027  | Flavobacteriales HTCC2170                                  | 89                            | 88               | 89               | 91               | 81               | 84               |
| 644736369  | <i>Flavobacterium johnsoniae</i><br>UW101                  | 88                            | 89               | 88               | 88               | 81               | 84               |
| 639633025  | <i>Gramella forsetii</i> KT0803                            | 89                            | 88               | 89               | 90               | 82               | 85               |
| 641380434  | <i>Kordia algicida</i> OT-1                                | 90                            | 91               | 91               | 89               | 82               | 84               |
| 638341115  | <i>Leeuwenhoekiella blandensis</i><br>MED217               | 90                            | 87               | 89               | 92               | 81               | 85               |
| 640196209  | <i>Microscilla marina</i><br>ATCC23134                     | 80                            | 81               | 80               | 80               | 81               | 81               |
| 640963036  | <i>Pedobacter</i> BAL39                                    | 81                            | 82               | 83               | 83               | 81               | 83               |
| 638341152  | <i>Polaribacter irgensii</i> 23-P                          | 88                            | 94               | 89               | 89               | 81               | 84               |
| 638341218  | <i>Polaribacter</i> MED152                                 | 89                            | 95               | 89               | 89               | 81               | 84               |
| 638341165  | <i>Psychroflexus</i> ATCC700755                            | 89                            | 89               | 89               | 89               | 81               | 83               |
| 646311950  | <i>Robiginitalea biformata</i><br>HTCC2501                 | 88                            | 89               | 89               | 91               | 82               | 85               |
| 640963037  | <i>Ulvibacter</i> SCB49                                    | 91                            | 90               | 90               | 90               | 80               | 84               |
|            | <b>SAR116 (89-97%)</b>                                     | <b>AAA160J14</b>              | <b>AAA536K22</b> | <b>AAA536B06</b> | <b>AAA015N04</b> | <b>AAA300J16</b> | <b>AAA536G10</b> |
| 2503113005 | SAR116 HIMB100                                             | 90                            | 90               | 95               | 90               | 93               | 89               |
| 646564516  | <i>Cand. 'Puniceispirillum</i><br><i>marinum'</i> IMCC1322 | 91                            | 91               | 97               | 91               | 96               | 90               |
|            | <b>Roseobacter (90-95%)</b>                                | <b>AAA015O19</b>              | <b>AAA076C03</b> | <b>AAA298K06</b> |                  |                  |                  |
| 637000137  | <i>Jannaschia</i> CCS1                                     | 93                            | 92               | 91               |                  |                  |                  |
| 638341119  | <i>Loktanella vestfoldensis</i><br>SKA53                   | 92                            | 92               | 92               |                  |                  |                  |
| 638341139  | <i>Oceanicola batsensis</i>                                | 94                            | 91               | 94               |                  |                  |                  |
| 638341140  | <i>Oceanicola granulosus</i>                               | 92                            | 92               | 92               |                  |                  |                  |
| 647533189  | <i>Octadecabacter</i> 238                                  | 93                            | 92               | 91               |                  |                  |                  |
| 647533190  | <i>Octadecabacter</i> 307                                  | 93                            | 92               | 91               |                  |                  |                  |
| 648276686  | <i>Rhodobacteriales</i> HTCC2654                           | 94                            | 92               | 93               |                  |                  |                  |
| 640612221  | <i>Roseobacter</i> CCS2                                    | 93                            | 92               | 92               |                  |                  |                  |
| 639633056  | <i>Roseobacter denitrificans</i> OCh<br>114                | 94                            | 91               | 93               |                  |                  |                  |

| <b>IMG ID</b>                  | <b>Culture</b>                     | <b>SAG</b>       |                  |    |
|--------------------------------|------------------------------------|------------------|------------------|----|
| 647533205                      | <i>Roseobacter</i> GAI101          | 94               | 92               | 92 |
| 638341182                      | <i>Roseobacter</i> sp. MED193      | 95               | 92               | 94 |
| 640612220                      | <i>Roseobacter</i> sp. SK209-2-6   | 95               | 92               | 94 |
| 638341184                      | <i>Roseovarius</i> 217             | 93               | 92               | 94 |
| 648276709                      | <i>Roseovarius</i> HTCC2601        | 95               | 91               | 94 |
| 640612219                      | <i>Sagittula stellata</i>          | 93               | 90               | 92 |
| 637000267                      | <i>Silicibacter pomeroyi</i> DSS-3 | 94               | 92               | 95 |
| 638341211                      | <i>Sulfitobacter</i> sp. EE36      | 94               | 92               | 93 |
| 638341212                      | <i>Sulfitobacter</i> sp. NAS141    | 94               | 92               | 93 |
| 647533238                      | <i>Thalassobium</i> R2A62          | 94               | 93               | 92 |
| <b>SAR92 (95-96%)</b>          |                                    | <b>AAA300D14</b> | <b>AAA160D02</b> |    |
| 638341247                      | Gamma HTCC2207                     | 95               | 96               |    |
| <b>Actinobacteria (79-81%)</b> |                                    | <b>AAA015D07</b> | <b>AAA015M09</b> |    |
| 638341107                      | <i>Janibacter</i> sp. HTCC2649     | 79               | 81               |    |
| 638341246                      | Marine actinobacterium<br>PHSC20C1 | 80               | 80               |    |

**Table S5.** Metadata for metagenomes used in fragment recruitment analysis, in the order presented in the heatmap (Fig. 3). Library sequencing type designation: S, sanger; P, pyrosequencing (454 Titanium); F, fosmid. Physio-chemical abbreviations: T, temperature; S, salinity; Depth, water column depth; N, nitrate; P, phosphate; Si, silicate; Chl *a*, chlorophyll *a* concentration. Metadata for GOS samples was taken from Yilmaz, et al. (61). NA, not available; NDE, not detectable; ND, not determined.

| Sample    | Date     | Latitude | Longitude | Library | No. Seqs | Size (Mbp) | %GC  | T (°C) | S (PSU) | Depth (m) | N (μmol L <sup>-1</sup> ) | P (μmol L <sup>-1</sup> ) | Si (μmol L <sup>-1</sup> ) | Chl <i>a</i> (μg kg <sup>-1</sup> ) |
|-----------|----------|----------|-----------|---------|----------|------------|------|--------|---------|-----------|---------------------------|---------------------------|----------------------------|-------------------------------------|
| GS123     | 10/01/05 | -32.399  | 36.592    | S       | 107,966  | 115.6      | 36.0 | 20.40  | 35.80   | 1860      | 0.15                      | 0.22                      | 3.55                       | 0.23                                |
| GS122     | 09/30/05 | -30.898  | 40.420    | S       | 151,654  | 157.9      | 41.5 | 20.20  | 35.80   | 4921      | 1.01                      | 0.15                      | 2.71                       | 0.15                                |
| GS121     | 09/29/05 | -29.349  | 43.216    | S       | 110,720  | 119.4      | 34.8 | 23.10  | 35.40   | 4309      | 0.72                      | 0.17                      | 3.52                       | 0.14                                |
| GS120     | 09/27/05 | -26.035  | 50.123    | S       | 46,052   | 45.7       | 34.2 | 22.50  | 35.60   | 5081      | 0.12                      | 0.20                      | 3.18                       | 0.12                                |
| GS119     | 09/26/09 | -23.216  | 52.306    | S       | 60,987   | 65.1       | 33.9 | 23.80  | 35.40   | 2995      | 0.17                      | 0.17                      | 2.93                       | 0.08                                |
| GS149     | 09/12/05 | -6.117   | 39.117    | S       | 110,984  | 111.2      | 37.5 | 21.27  | 29.28   | 5         | NA                        | 0.16                      | 3.00                       | NA                                  |
| GS148     | 09/11/05 | -6.317   | 39.009    | S       | 107,741  | 107.6      | 38.7 | 21.27  | 29.28   | 1         | NA                        | 0.16                      | 3.00                       | NA                                  |
| GS117     | 09/09/05 | -4.614   | 55.509    | S       | 397,561  | 394.6      | 40.8 | 26.40  | 35.50   | 4513      | 0.25                      | 0.19                      | 2.29                       | 0.21                                |
| GS116     | 08/17/05 | -4.635   | 56.836    | S       | 60,932   | 64.2       | 36.1 | 26.20  | 33.10   | 2150      | 0.18                      | 0.13                      | 2.93                       | 0.29                                |
| GS115     | 08/16/05 | -4.663   | 60.523    | S       | 61,020   | 64.2       | 35.2 | 27.90  | 33.20   | 3220      | 0.13                      | 0.27                      | 4.15                       | 0.14                                |
| GS114     | 08/15/05 | -4.990   | 64.977    | S       | 348,823  | 345.3      | 34.9 | 28.20  | 33.10   | 3649      | 0.11                      | 0.23                      | 2.75                       | 0.14                                |
| GS113     | 08/09/05 | -7.008   | 76.331    | S       | 109,700  | 118.3      | 35.0 | 27.50  | 33.30   | 4573      | 0.30                      | 0.16                      | 4.37                       | 0.24                                |
| GS112*    | 08/08/05 | -8.505   | 80.376    | S       | 151,899  | 157.5      | 41.3 | 26.60  | 32.50   | 4573      | 0.20                      | 0.05                      | 2.97                       | 0.13                                |
| GS112_454 | 08/08/05 | -8.505   | 80.376    | P       | 410,687  | 227.0      | 37.0 | -      | -       | 4573      | -                         | -                         | -                          | -                                   |
| GS111     | 08/07/05 | -9.597   | 84.198    | S       | 59,080   | 62.1       | 34.8 | 26.40  | 32.30   | 3841      | 0.15                      | 0.08                      | 2.60                       | 0.20                                |
| GS110     | 08/06/05 | -10.446  | 88.303    | S       | 148,885  | 153.7      | 41.3 | 27.00  | 32.70   | 1220      | 0.12                      | 0.11                      | 3.44                       | 0.13                                |
| GS109     | 08/05/05 | -10.944  | 92.059    | S       | 59,813   | 62.8       | 34.4 | 27.20  | 32.60   | 4573      | 0.03                      | 0.13                      | 2.15                       | 0.14                                |
| GS108*    | 08/04/05 | -12.093  | 96.882    | S       | 101,382  | 104.4      | 42.2 | 25.80  | 32.40   | 7         | 0.02                      | 0.21                      | 1.43                       | 0.11                                |
| GS108_454 | 08/04/05 | -12.093  | 96.882    | P       | 529,447  | 295.6      | 33.2 | -      | -       | 7         | -                         | -                         | -                          | -                                   |
| HF10      | 10/07/02 | 22.750   | -158.000  | F       | 7,829    | 13.1       | 48.6 | 26.40  | 35.08   | 4790      | 0.01                      | 0.04                      | 1.05                       | 0.08                                |
| HOT215    | 09/24/09 | 22.750   | -158.000  | P       | 943,226  | 351.4      | 35.2 | 26.48  | 35.48   | 4790      | 0.01                      | 0.04                      | 1.11                       | 0.06                                |
| GS049     | 05/17/04 | -17.453  | -149.799  | S       | 92,501   | 94.4       | 34.7 | 28.80  | 32.60   | 900       | 0.01                      | 0.19                      | 0.80                       | 0.10                                |
| GS048*    | 05/17/04 | -17.476  | -149.812  | S       | 138,207  | 143.8      | 45.7 | 28.90  | 35.10   | 34        | 0.01                      | 0.19                      | 0.80                       | 0.10                                |
| GS051     | 05/22/04 | -15.144  | -147.435  | S       | 128,982  | 140.5      | 36.5 | 27.30  | 34.20   | 10        | 0.08                      | 0.24                      | 0.73                       | NA                                  |
| GS037     | 03/17/04 | -1.974   | -95.015   | S       | 65,670   | 68.7       | 37.3 | 28.00  | 34.38   | 3334      | 5.61                      | 0.56                      | 4.83                       | 0.21                                |
| GS028     | 02/04/04 | -1.217   | -90.320   | S       | 189,052  | 205.0      | 36.1 | 25.22  | 34.39   | 156       | 3.17                      | 0.52                      | 6.37                       | 0.35                                |
| GS027     | 02/04/04 | -1.216   | -90.423   | S       | 222,080  | 237.3      | 37.3 | 25.50  | 34.90   | 2         | 3.20                      | 0.52                      | 6.42                       | 0.40                                |
| GS031     | 02/10/04 | -0.301   | -91.652   | S       | 436,401  | 461.7      | 34.4 | 18.60  | 29.07   | 20        | 0.87                      | 0.12                      | 0.50                       | 0.35                                |

| Sample | Date     | Latitude | Longitude | Library | No. Seqs  | Size (Mbp) | %GC  | T (°C) | S (PSU) | Depth (m) | N (μmol L <sup>-1</sup> ) | P (μmol L <sup>-1</sup> ) | Si (μmol L <sup>-1</sup> ) | Chl <i>a</i> (μg kg <sup>-1</sup> ) |
|--------|----------|----------|-----------|---------|-----------|------------|------|--------|---------|-----------|---------------------------|---------------------------|----------------------------|-------------------------------------|
| GS034  | 02/19/04 | -0.383   | -90.280   | S       | 134,347   | 142.2      | 40.2 | 27.50  | 34.23   | 35        | 1.95                      | 0.48                      | 6.45                       | 0.36                                |
| GS029  | 02/08/04 | -0.200   | -90.835   | S       | 131,529   | 143.8      | 35.6 | 26.20  | 34.50   | 12        | 1.95                      | 0.48                      | 6.45                       | 0.40                                |
| GS036  | 03/02/04 | -0.021   | -91.198   | S       | 77,538    | 85.8       | 37.4 | 25.80  | 34.60   | 67        | 2.69                      | 0.64                      | 1.10                       | 0.65                                |
| GS030  | 02/09/04 | 0.272    | -91.633   | S       | 359,152   | 391.7      | 35.2 | 26.90  | 34.40   | 19        | 4.95                      | 0.48                      | 6.91                       | NA                                  |
| GS035  | 03/01/04 | 1.389    | -91.817   | S       | 140,814   | 151.8      | 36.4 | 21.80  | 34.50   | 71        | 2.55                      | 0.50                      | 3.22                       | 0.28                                |
| GS026  | 02/01/04 | 1.264    | -90.295   | S       | 102,708   | 109.0      | 34.9 | 27.80  | 32.60   | 2386      | 0.69                      | 0.28                      | 3.02                       | 0.22                                |
| GS025  | 01/28/04 | 5.553    | -87.088   | S       | 120,671   | 129.8      | 45.9 | 28.30  | 31.40   | 30        | 6.63                      | 0.71                      | 4.42                       | 0.11                                |
| GS023  | 01/21/04 | 5.640    | -86.565   | S       | 133,051   | 143.6      | 35.7 | 28.70  | 32.60   | 1139      | 6.50                      | 0.69                      | 4.50                       | 0.07                                |
| GS022  | 01/20/04 | 6.493    | -82.904   | S       | 121,662   | 131.1      | 35.6 | 29.30  | 32.30   | 2431      | 1.86                      | 0.33                      | 2.17                       | 0.33                                |
| GS021  | 01/19/04 | 8.129    | -79.691   | S       | 131,798   | 143.5      | 39.0 | 27.60  | 30.70   | 76        | 0.01                      | 0.21                      | 2.71                       | 0.50                                |
| GS019  | 01/12/04 | 10.716   | -80.254   | S       | 135,325   | 146.4      | 35.5 | 27.70  | 35.40   | 3336      | 0.00                      | 0.05                      | 2.25                       | 0.23                                |
| GS018  | 01/10/04 | 18.037   | -83.785   | S       | 142,743   | 156.5      | 36.1 | 27.40  | 35.40   | 4470      | 0.45                      | 0.10                      | 2.21                       | 0.14                                |
| GS017  | 01/09/04 | 20.523   | -85.414   | S       | 257,581   | 42.1       | 36.0 | 27.00  | 35.80   | 4513      | 0.31                      | 0.14                      | 1.82                       | 0.13                                |
| GS016  | 01/08/04 | 24.175   | -84.344   | S       | 127,122   | 137.5      | 37.0 | 26.40  | 35.80   | 3333      | 0.59                      | 0.04                      | 1.32                       | 0.16                                |
| GS015  | 01/08/04 | 24.488   | -83.070   | S       | 127,362   | 138.0      | 36.1 | 25.00  | 36.00   | 47        | 0.95                      | 0.04                      | 1.22                       | 0.20                                |
| GS014  | 12/20/03 | 32.507   | -79.264   | S       | 128,885   | 139.9      | 36.9 | 18.60  | 36.04   | 31        | 0.15                      | 0.20                      | 1.14                       | 1.70                                |
| GS001a | 05/15/03 | 32.167   | -64.500   | S       | 142,352   | 143.3      | 50.0 | 22.90  | 36.70   | 4200      | 0.10                      | 0.05                      | 0.91                       | 0.10                                |
| GS001b | 05/15/03 | 32.167   | -64.500   | S       | 90,905    | 91.0       | 48.1 | -      | -       | 4200      | -                         | -                         | -                          | -                                   |
| GS001c | 05/15/03 | 32.167   | -64.500   | S       | 92,351    | 92.7       | 35.6 | -      | -       | 4200      | -                         | -                         | -                          | -                                   |
| GS000b | 02/26/03 | 31.175   | -64.324   | S       | 317,180   | 321.0      | 36.1 | 20.50  | 36.70   | 4200      | 0.24                      | 0.06                      | 0.81                       | 0.17                                |
| GS000c | 02/26/03 | 32.175   | -64.010   | S       | 368,835   | 371.7      | 37.3 | 19.80  | 36.70   | 4200      | 0.38                      | 0.06                      | 0.96                       | 0.17                                |
| GS000d | 02/26/03 | 31.175   | -64.324   | S       | 332,240   | 335.9      | 36.5 | 20.00  | 36.60   | 4200      | 0.11                      | 0.06                      | 0.79                       | 0.17                                |
| MED    | 10/15/07 | 38.069   | 0.232     | P       | 157,230   | 88.5       | 39.5 | 15.90  | 38.60   | 200       | NDE                       | NDE                       | NA                         | 3.48                                |
| GS367  | 01/08/25 | -48.249  | 145.805   | P       | 1,204,979 | 482.9      | 41.0 | 10.9   | 3.44    | 3490      | NA                        | NA                        | NA                         | 0.20                                |
| GS368  | 01/08/26 | -44.718  | 145.755   | P       | 661,063   | 246.2      | 37.1 | 14.2   | 3.47    | 3201      | NA                        | NA                        | NA                         | 1.30                                |
| GS369  | 01/09/24 | -77.680  | 166.009   | P       | 957,060   | 340.7      | 42.9 | -2.0   | 3.35    | 300       | NA                        | NA                        | NA                         | 4.46                                |
| P26_j  | 06/14/09 | 50.000   | -145.000  | F       | 8,373     | 7.6        | 49.4 | 9.53   | 32.57   | 4300      | 10.75                     | 1.05                      | 17.50                      | 0.75                                |
| P26_a  | 08/27/09 | 50.000   | -145.000  | F       | 5,767     | 3.4        | 51.1 | 12.55  | 32.46   | 4300      | 7.89                      | 0.76                      | 12.50                      | 0.52                                |
| P12_j  | 06/09/09 | 48.970   | -130.667  | F       | 7,031     | 4.3        | 40.2 | 11.23  | 32.42   | 3300      | 6.15                      | 0.83                      | 11.80                      | 0.72                                |
| P12_a  | 08/23/09 | 48.970   | -130.667  | F       | 6,402     | 3.9        | 43.0 | 15.79  | 32.27   | 3300      | 1.20                      | 0.48                      | 11.30                      | 1.02                                |
| P12_f  | 02/06/10 | 48.970   | -130.667  | F       | 685       | 1.1        | 47.7 | 8.41   | 32.35   | 3300      | 6.89                      | 0.87                      | 10.60                      | NA                                  |
| P4_j   | 06/08/09 | 48.650   | -126.667  | F       | 7,238     | 4.6        | 43.6 | 12.30  | 32.12   | 1300      | 0.00                      | 0.37                      | 2.20                       | 0.78                                |

| Sample           | Date     | Latitude | Longitude | Library | No. Seqs  | Size (Mbp) | %GC  | T (°C) | S (PSU) | Depth (m) | N (μmol L <sup>-1</sup> ) | P (μmol L <sup>-1</sup> ) | Si (μmol L <sup>-1</sup> ) | Chl <i>a</i> (μg kg <sup>-1</sup> ) |
|------------------|----------|----------|-----------|---------|-----------|------------|------|--------|---------|-----------|---------------------------|---------------------------|----------------------------|-------------------------------------|
| P4_a             | 08/29/09 | 48.650   | -126.667  | F       | 7,273     | 4.3        | 43.8 | 12.33  | 32.24   | 1300      | 5.19                      | 0.72                      | 18.50                      | 1.72                                |
| P4_f             | 02/04/10 | 48.650   | -126.667  | F       | 530       | 0.9        | 46.0 | 9.81   | 32.44   | 1300      | 6.26                      | 0.79                      | 8.60                       | NA                                  |
| GS013            | 12/19/03 | 36.004   | -75.395   | S       | 138,033   | 149.0      | 43.9 | 9.30   | 33.95   | 20        | 1.06                      | 0.25                      | 1.27                       | 3.00                                |
| GS010            | 11/18/03 | 38.940   | -74.685   | S       | 78,304    | 82.4       | 38.6 | 12.00  | 31.00   | 10        | 1.95                      | 0.48                      | 1.02                       | 2.00                                |
| GS009            | 11/17/03 | 41.091   | -71.602   | S       | 79,303    | 84.3       | 38.3 | 11.00  | 31.00   | 32        | 1.39                      | 0.63                      | 0.83                       | 4.00                                |
| GS008            | 11/16/03 | 41.486   | -71.351   | S       | 129,655   | 137.7      | 45.3 | 9.40   | 26.50   | 12        | 0.34                      | 0.60                      | 0.76                       | 2.20                                |
| GS002            | 08/21/03 | 42.503   | -67.240   | S       | 121,590   | 128.8      | 36.6 | 18.20  | 29.20   | 106       | 0.29                      | 0.21                      | 2.18                       | 1.40                                |
| GS003            | 08/21/03 | 42.853   | -66.217   | S       | 61,605    | 66.9       | 37.4 | 11.70  | 29.90   | 119       | 0.33                      | 0.21                      | 2.21                       | 1.40                                |
| GS007            | 08/25/03 | 43.632   | -66.847   | S       | 50,980    | 55.4       | 40.7 | 17.90  | 31.70   | 139       | 0.35                      | 0.28                      | 2.86                       | 1.40                                |
| GS005            | 08/22/03 | 44.690   | -63.637   | S       | 61,131    | 66.0       | 41.0 | 15.00  | 30.20   | 64        | 0.07                      | 0.12                      | 0.71                       | 6.00                                |
| GS006            | 08/23/03 | 45.112   | -64.947   | S       | 59,679    | 64.6       | 35.5 | 11.20  | 28.90   | 11        | 0.07                      | 0.13                      | 0.81                       | 2.80                                |
| GS004            | 08/22/03 | 44.137   | -63.644   | S       | 52,959    | 56.9       | 39.6 | 13.86  | 28.30   | 142       | 0.05                      | 0.09                      | 0.55                       | 0.40                                |
| ECH1_4444<br>077 | 04/22/08 | 50.252   | -4.209    | P       | 513,568   | 193.1      | 36.4 | 9.7    | 35.12   | 50        | 4.02                      | 0.40                      | 2.60                       | 2.20                                |
| ECH2_4444<br>083 | 08/27/08 | 50.252   | -4.209    | P       | 262,800   | 97.8       | 36.8 | 15.7   | 33.30   | 50        | 0.90                      | 0.06                      | 0.22                       | 8.17                                |
| ECH3_4445<br>065 | 08/26/08 | 50.252   | -4.209    | P       | 426,931   | 161.5      | 37.3 | 15.9   | 32.10   | 50        | 0.08                      | 0.03                      | 0.12                       | 9.24                                |
| ECH4_4445<br>066 | 08/27/08 | 50.252   | -4.209    | P       | 406,423   | 153.7      | 36.8 | 15.8   | 33.20   | 50        | 0.09                      | 0.10                      | 0.15                       | 11.91                               |
| ECH5_4445<br>067 | 04/22/08 | 50.252   | -4.209    | P       | 387,691   | 143.2      | 36.8 | 9.6    | 35.00   | 50        | 3.75                      | 0.32                      | 2.70                       | 1.32                                |
| ECH6_4445<br>068 | 08/26/08 | 50.252   | -4.209    | P       | 499,348   | 185.4      | 37.5 | 15.8   | 33.30   | 50        | 0.90                      | 0.08                      | 0.33                       | 9.80                                |
| ECH7_4445<br>069 | 01/28/08 | 50.252   | -4.209    | P       | 591,615   | 216.5      | 38.3 | 10.1   | 33.33   | 50        | 10.9                      | 0.53                      | 6.01                       | 0.81                                |
| ECH8_4445<br>070 | 01/28/08 | 50.252   | -4.209    | P       | 627,119   | 234.8      | 37.7 | 10.1   | 34.20   | 50        | 10.0                      | 0.52                      | 5.75                       | 0.85                                |
| ERS095011        | 08/21/08 | 54.184   | 7.900     | P       | 171,339   | 98.7       | 40.2 | NA     | NA      | ND        | NA                        | NA                        | NA                         | NA                                  |
| ERS095012        | 02/11/09 | 54.184   | 7.900     | P       | 308,889   | 167.7      | 44.4 | 4.0    | 34.26   | ND        | 6.14                      | 0.40                      | 2.76                       | 0.25                                |
| ERS095013        | 03/31/09 | 54.184   | 7.900     | P       | 290,819   | 155.7      | 43.8 | 4.0    | 33.39   | ND        | 9.87                      | 0.19                      | 4.23                       | 0.92                                |
| ERS095014        | 04/07/09 | 54.184   | 7.900     | P       | 382,770   | 199.5      | 43.4 | 5.8    | 32.17   | ND        | 11.01                     | 0.04                      | 0.25                       | 4.63                                |
| ERS095015        | 04/14/09 | 54.184   | 7.900     | P       | 897,396   | 538.6      | 41.3 | 6.4    | 32.90   | ND        | 4.92                      | 0.01                      | 0.17                       | 3.62                                |
| ERS095018        | 06/16/09 | 54.184   | 7.900     | P       | 177,797   | 92.9       | 44.9 | 13.2   | 31.55   | ND        | 1.66                      | 0.03                      | 0.61                       | 3.09                                |
| ERS095019        | 09/01/09 | 54.184   | 7.900     | P       | 1,078,370 | 583.9      | 40.3 | 18.0   | 32.55   | ND        | NA                        | 0.43                      | 12.61                      | 12.13                               |
| GS394            | 12/08/17 | -53.025  | 73.375    | P       | 758,197   | 252.8      | 40.8 | 2.4    | 3.39    | 100       | NA                        | NA                        | NA                         | 0.60                                |
| GS393            | 12/08/15 | -55.265  | 74.256    | P       | 1,002,776 | 385.1      | 38.7 | 2.0    | 3.39    | 2246      | NA                        | NA                        | NA                         | 0.50                                |
| GS392            | 12/08/13 | -64.198  | 76.457    | P       | 988,765   | 377.3      | 40.9 | -1.5   | 3.36    | 3847      | NA                        | NA                        | NA                         | 0.04                                |



| Sample | Date     | Latitude | Longitude | Library | No. Seqs  | Size (Mbp) | %GC  | T (°C) | S (PSU) | Depth (m) | N (μmol L <sup>-1</sup> ) | P (μmol L <sup>-1</sup> ) | Si (μmol L <sup>-1</sup> ) | Chl <i>a</i> (μg kg <sup>-1</sup> ) |
|--------|----------|----------|-----------|---------|-----------|------------|------|--------|---------|-----------|---------------------------|---------------------------|----------------------------|-------------------------------------|
| GS390  | 10/08/30 | -64.831  | 80.724    | P       | 741,120   | 261.2      | 41.1 | -1.7   | 3.43    | 116       | NA                        | NA                        | NA                         | 0.32                                |
| GS391  | 12/08/12 | -68.396  | 76.680    | P       | 529,491   | 199.6      | 43.0 | -1.4   | 3.42    | 378       | NA                        | NA                        | NA                         | 5.00                                |
| GS235  | 01/01/07 | -66.270  | 110.533   | P       | 792,452   | 278.3      | 37.4 | -0.5   | 3.39    | 60        | NA                        | NA                        | NA                         | 8.60                                |
| GS389  | 10/08/22 | -64.803  | 112.380   | P       | 832,650   | 322.3      | 43.1 | -1.8   | 3.47    | 500       | NA                        | NA                        | NA                         | 0.14                                |
| GS236  | 01/07/07 | -63.891  | 112.073   | P       | 1,133,502 | 408.0      | 38.8 | -0.2   | 3.37    | 2500      | NA                        | NA                        | NA                         | 12.10                               |
| GS388  | 10/08/20 | -63.818  | 115.173   | P       | 741,703   | 304.6      | 39.3 | -1.7   | 3.40    | 2500      | NA                        | NA                        | NA                         | 1.50                                |
| GS387  | 10/08/19 | -60.503  | 120.048   | P       | 717,796   | 290.8      | 40.5 | -1.5   | 3.45    | 3200      | NA                        | NA                        | NA                         | 0.22                                |
| GS386  | 10/08/17 | -54.948  | 129.620   | P       | 806,943   | 324.5      | 42.0 | 2.0    | 3.38    | 3200      | NA                        | NA                        | NA                         | 0.22                                |
| GS353  | 12/07/30 | -67.052  | 144.669   | P       | 940,823   | 380.2      | 40.6 | -1.8   | 3.45    | 178       | NA                        | NA                        | NA                         | 0.00                                |
| GS355  | 01/03/08 | -66.762  | 144.334   | P       | 1,116,030 | 436.7      | 39.7 | -0.9   | 3.40    | 891       | NA                        | NA                        | NA                         | 8.40                                |
| GS352  | 12/07/29 | -66.765  | 143.291   | P       | 1,254,021 | 499.4      | 40.6 | -0.8   | 3.40    | 169       | NA                        | NA                        | NA                         | 1.00                                |
| GS351  | 12/07/28 | -66.559  | 143.337   | P       | 1,402,873 | 493.8      | 43.0 | -0.7   | 3.40    | 597       | NA                        | NA                        | NA                         | 1.60                                |
| GS349  | 12/07/27 | -66.566  | 142.317   | P       | 901,998   | 346.9      | 42.4 | -1.3   | 3.40    | 365       | NA                        | NA                        | NA                         | 3.70                                |
| GS348  | 12/07/24 | -66.339  | 142.988   | P       | 837,796   | 347.9      | 40.5 | -0.6   | 3.42    | 649       | NA                        | NA                        | NA                         | 12.60                               |
| GS359  | 01/08/12 | -66.190  | 143.492   | P       | 1,327,129 | 435.7      | 42.8 | 0.1    | 3.41    | 364       | NA                        | NA                        | NA                         | 2.40                                |
| GS360  | 01/08/13 | -66.582  | 140.881   | P       | 838,841   | 307.0      | 41.3 | -0.7   | 3.41    | 308       | NA                        | NA                        | NA                         | 7.50                                |
| GS357  | 01/05/08 | -66.172  | 142.935   | P       | 1,212,316 | 460.7      | 40.9 | -0.5   | 3.42    | 533       | NA                        | NA                        | NA                         | 2.70                                |
| GS347  | 12/07/23 | -66.021  | 142.666   | P       | 915,367   | 292.8      | 41.5 | -0.7   | 3.40    | 443       | NA                        | NA                        | NA                         | 3.20                                |
| GS362  | 01/08/19 | -65.537  | 140.723   | P       | 938,200   | 358.0      | 38.8 | 0.8    | 3.62    | 1027      | NA                        | NA                        | NA                         | 0.20                                |
| GS358  | 01/09/08 | -64.300  | 150.006   | P       | 818,549   | 302.1      | 41.1 | 0.0    | 3.35    | 3561      | NA                        | NA                        | NA                         | 0.30                                |
| GS363  | 01/08/22 | -60.000  | 141.234   | P       | 945,021   | 330.0      | 41.6 | 3.5    | 3.37    | 4473      | NA                        | NA                        | NA                         | 0.10                                |
| GS346  | 12/07/20 | -59.312  | 142.463   | P       | 873,249   | 325.2      | 44.5 | 2.9    | 3.37    | 3294      | NA                        | NA                        | NA                         | 0.30                                |
| GS364  | 01/08/23 | -56.695  | 141.869   | P       | 914,798   | 355.0      | 42.2 | 4.2    | 3.37    | 3693      | NA                        | NA                        | NA                         | 0.50                                |
| GS366  | 01/08/24 | -52.023  | 144.066   | P       | 901,102   | 335.1      | 37.9 | 7.7    | 3.38    | 3180      | NA                        | NA                        | NA                         | 0.30                                |
| GS346  | 12/07/20 | -59.312  | 142.463   | P       | 873,249   | 325.2      | 44.5 | 2.9    | 3.37    | 3294      | NA                        | NA                        | NA                         | 0.30                                |

\*Sanger sequences obtained from all size fractions (0.1μm, 0.8μm, and 3.0μm) were used in the analysis.

|                |               |           |           |
|----------------|---------------|-----------|-----------|
| <b>Total</b>   | 45,138,685    | 22,890.8  |           |
| <b>Average</b> | 395,953       | 200.8     | 39.6      |
| <b>Range</b>   | 530-1,402,873 | 0.9-583.9 | 33.2-51.1 |

**Table S6.** Percentage of encoded amino acids in genomes from marine cultures and SAGs.

| Genome                                       | A    | C   | D    | E    | F    | G    | H    | I    | K    | L    | M    | N    | P    | Q    | R    | S    | T    | V    | W    | Y    |
|----------------------------------------------|------|-----|------|------|------|------|------|------|------|------|------|------|------|------|------|------|------|------|------|------|
| Alcanivorax_borkumensis_SK2                  | 10.0 | 1.0 | 5.8  | 6.0  | 3.6  | 7.8  | 2.3  | 4.9  | 3.8  | 11.1 | 2.6  | 3.3  | 4.7  | 4.5  | 6.2  | 5.7  | 5.1  | 7.2  | 1.5  | 2.6  |
| Candidatus_Pelagibacter_sp_HTCC7211          | 5.6  | 1.0 | 5.3  | 6.0  | 5.2  | 6.3  | 1.6  | 9.6  | 10.4 | 9.3  | 2.2  | 6.7  | 3.3  | 2.7  | 3.2  | 6.9  | 4.8  | 5.6  | 1.0  | 3.4  |
| Candidatus_Pelagibacter_ubique_HTCC1002      | 5.7  | 1.0 | 5.4  | 6.1  | 5.2  | 6.3  | 1.6  | 9.5  | 10.3 | 9.4  | 2.2  | 6.5  | 3.2  | 2.6  | 3.1  | 6.9  | 5.1  | 5.6  | 0.9  | 3.4  |
| Candidatus_Pelagibacter_ubique_HTCC1062      | 5.7  | 1.0 | 5.4  | 6.0  | 5.2  | 6.3  | 1.6  | 9.5  | 10.2 | 9.4  | 2.2  | 6.5  | 3.2  | 2.6  | 3.1  | 6.9  | 5.1  | 5.7  | 0.9  | 3.3  |
| Candidatus_Puniceispirillum_marinum_IMCC1322 | 10.9 | 1.0 | 6.6  | 5.0  | 4.0  | 7.8  | 2.3  | 6.6  | 4.2  | 9.5  | 3.1  | 3.6  | 4.4  | 3.4  | 5.4  | 6.2  | 5.6  | 6.8  | 1.2  | 2.5  |
| Congregibacter_KT71                          | 10.8 | 0.9 | 6.1  | 6.4  | 3.7  | 7.9  | 2.1  | 4.9  | 3.2  | 10.7 | 2.4  | 3.0  | 4.7  | 3.7  | 6.7  | 6.4  | 5.1  | 7.1  | 1.4  | 2.7  |
| Croceibacter_atlanticus_HTCC2559             | 6.5  | 0.7 | 5.9  | 6.6  | 5.0  | 6.4  | 1.7  | 7.6  | 7.3  | 9.3  | 2.1  | 6.3  | 3.4  | 3.5  | 3.4  | 6.6  | 6.4  | 6.4  | 1.0  | 4.0  |
| Dokdonia_MED134                              | 7.3  | 0.7 | 6.1  | 6.5  | 4.9  | 6.7  | 1.7  | 7.4  | 6.7  | 9.1  | 2.2  | 5.4  | 3.5  | 3.5  | 3.7  | 6.2  | 6.6  | 6.6  | 1.0  | 4.0  |
| Erythrobacter_litoralis_HTCC2594             | 12.3 | 0.8 | 6.3  | 6.6  | 3.7  | 8.8  | 1.9  | 5.1  | 3.3  | 9.6  | 2.5  | 2.6  | 5.1  | 3.2  | 6.9  | 5.3  | 5.2  | 6.9  | 1.4  | 2.2  |
| Flavobacteria_bacterium_BAL38                | 6.2  | 0.8 | 5.2  | 6.6  | 5.6  | 6.2  | 1.6  | 8.3  | 8.1  | 9.0  | 2.2  | 6.7  | 3.3  | 3.4  | 3.0  | 6.6  | 6.0  | 6.3  | 1.0  | 4.1  |
| Flavobacteria_bacterium_BBFL7                | 6.8  | 0.7 | 6.3  | 6.2  | 4.8  | 6.5  | 1.9  | 7.8  | 6.6  | 9.1  | 2.4  | 6.0  | 3.4  | 3.7  | 3.6  | 6.6  | 6.1  | 6.3  | 1.0  | 4.1  |
| Flavobacteriales_ALC1                        | 6.1  | 0.7 | 6.0  | 6.4  | 5.2  | 6.3  | 1.7  | 8.2  | 7.8  | 9.2  | 2.1  | 6.6  | 3.2  | 3.2  | 3.2  | 6.7  | 6.0  | 6.1  | 1.0  | 4.2  |
| Flavobacteriales_HTCC2170                    | 6.3  | 0.7 | 5.8  | 6.7  | 5.1  | 6.9  | 1.9  | 7.7  | 7.6  | 9.2  | 2.4  | 5.9  | 3.6  | 3.2  | 3.5  | 6.5  | 5.6  | 6.3  | 1.2  | 3.9  |
| Flavobacterium_johnsoniae_UW101              | 6.4  | 0.8 | 5.4  | 6.4  | 5.3  | 6.2  | 1.6  | 8.0  | 8.2  | 9.1  | 2.1  | 6.5  | 3.4  | 3.4  | 3.2  | 6.7  | 5.9  | 6.0  | 1.1  | 4.2  |
| Fulvimarina_pelagi                           | 11.7 | 0.8 | 6.0  | 6.6  | 4.0  | 8.6  | 1.9  | 5.5  | 3.4  | 9.6  | 2.5  | 2.7  | 4.9  | 2.9  | 7.0  | 5.9  | 5.5  | 7.2  | 1.2  | 2.2  |
| Gamma_HTCC2080                               | 10.5 | 1.0 | 5.9  | 6.1  | 3.8  | 8.1  | 2.1  | 5.3  | 3.3  | 10.4 | 2.4  | 3.4  | 4.7  | 4.0  | 5.7  | 6.4  | 5.6  | 7.2  | 1.5  | 2.6  |
| Gamma_HTCC2143                               | 9.2  | 1.0 | 5.9  | 6.0  | 4.0  | 7.5  | 2.1  | 6.4  | 4.5  | 10.1 | 2.6  | 3.9  | 4.2  | 4.1  | 5.2  | 6.8  | 5.3  | 7.0  | 1.3  | 2.9  |
| Gamma_HTCC2207                               | 9.7  | 1.0 | 5.9  | 6.1  | 3.9  | 7.6  | 2.0  | 6.2  | 4.3  | 10.3 | 2.6  | 3.8  | 4.2  | 4.3  | 5.0  | 6.9  | 5.2  | 7.1  | 1.2  | 2.8  |
| Gamma_proteobacterium_HTCC2148               | 10.0 | 1.1 | 6.0  | 6.4  | 3.8  | 8.0  | 2.1  | 5.4  | 3.6  | 10.3 | 2.6  | 3.5  | 4.5  | 4.1  | 5.6  | 6.5  | 5.1  | 7.0  | 1.4  | 2.9  |
| Gamma_proteobacterium_HTCC5015               | 9.8  | 1.0 | 6.0  | 6.7  | 3.7  | 7.4  | 2.4  | 5.2  | 4.2  | 10.3 | 2.5  | 3.4  | 4.3  | 4.6  | 6.1  | 6.3  | 4.9  | 7.0  | 1.4  | 2.8  |
| Gramella_forsetii_KT0803                     | 6.2  | 0.7 | 5.8  | 7.6  | 5.3  | 6.5  | 1.7  | 7.9  | 7.7  | 9.2  | 2.3  | 6.0  | 3.4  | 3.3  | 3.7  | 6.6  | 5.2  | 5.9  | 1.0  | 3.9  |
| Hypomonas_neptunium_ATCC_15444               | 12.7 | 0.8 | 5.7  | 6.2  | 3.8  | 8.7  | 1.8  | 5.2  | 3.4  | 9.8  | 2.6  | 2.6  | 5.3  | 3.1  | 6.7  | 5.6  | 5.4  | 6.9  | 1.4  | 2.3  |
| Janibacter_sp_HTCC2649                       | 36.7 | 8.4 | 25.4 | 23.5 | 16.8 | 31.0 | 14.9 | 20.1 | 15.2 | 32.0 | 13.8 | 14.2 | 23.7 | 16.8 | 26.8 | 24.3 | 26.0 | 30.8 | 12.7 | 13.5 |
| Jannaschia_CCS1                              | 12.6 | 0.9 | 6.4  | 5.6  | 3.8  | 8.8  | 2.1  | 5.2  | 2.6  | 9.9  | 2.9  | 2.5  | 5.3  | 3.2  | 6.5  | 5.1  | 5.9  | 7.3  | 1.4  | 2.2  |
| Kordia_algicida_OT-1                         | 6.3  | 0.8 | 5.6  | 6.7  | 5.2  | 5.9  | 1.8  | 8.0  | 8.1  | 8.9  | 2.1  | 6.3  | 3.2  | 3.6  | 3.4  | 6.3  | 6.4  | 6.0  | 1.0  | 4.2  |
| Leeuwenhoekella_blandensis_MED217            | 7.4  | 0.7 | 5.7  | 7.0  | 5.1  | 6.5  | 1.8  | 7.0  | 6.9  | 9.7  | 2.1  | 5.5  | 3.6  | 3.9  | 3.8  | 6.2  | 5.9  | 6.2  | 1.1  | 4.1  |
| Lentisphaera_araneosa_HTCC2155               | 6.9  | 1.2 | 5.8  | 6.7  | 4.6  | 6.3  | 2.3  | 6.6  | 8.0  | 9.8  | 2.5  | 4.9  | 3.9  | 3.8  | 4.3  | 7.0  | 4.8  | 5.5  | 1.3  | 3.6  |
| Loktanella_vestfoldensis_SKA53               | 13.0 | 0.9 | 6.5  | 4.6  | 3.7  | 8.5  | 2.1  | 5.6  | 3.0  | 10.0 | 2.9  | 2.6  | 4.9  | 3.6  | 6.4  | 4.8  | 5.8  | 7.4  | 1.3  | 2.2  |
| Marine_actinobacterium_PHSC20C1              | 36.1 | 7.1 | 24.5 | 24.3 | 18.5 | 29.4 | 13.8 | 23.5 | 16.2 | 32.3 | 13.8 | 16.5 | 22.1 | 17.1 | 25.2 | 26.2 | 25.4 | 29.9 | 11.9 | 14.5 |
| Marinomonas_MED121                           | 8.5  | 1.0 | 5.6  | 6.3  | 4.3  | 6.5  | 2.2  | 6.7  | 5.8  | 10.9 | 2.6  | 4.4  | 3.7  | 4.6  | 4.1  | 7.1  | 5.1  | 6.4  | 1.2  | 3.1  |
| Methylophaga_DSM010                          | 9.1  | 0.9 | 6.2  | 6.3  | 3.8  | 6.9  | 2.3  | 6.2  | 4.9  | 10.3 | 2.7  | 4.0  | 4.0  | 4.8  | 5.0  | 6.1  | 5.5  | 6.8  | 1.3  | 2.8  |
| Methylophilales_bacterium_HTCC2181           | 7.1  | 0.9 | 5.6  | 6.2  | 4.6  | 6.7  | 2.1  | 8.6  | 7.5  | 9.8  | 2.6  | 5.3  | 3.7  | 3.4  | 3.9  | 7.0  | 5.0  | 6.0  | 1.0  | 3.0  |
| Microscilla_marina_ATCC23134                 | 7.2  | 0.8 | 4.9  | 5.8  | 4.7  | 6.3  | 2.2  | 6.5  | 7.8  | 9.8  | 2.2  | 5.5  | 3.7  | 5.0  | 4.1  | 5.9  | 6.0  | 6.4  | 1.2  | 4.1  |
| Moritella_PE36                               | 8.7  | 1.1 | 5.6  | 5.6  | 4.2  | 6.5  | 2.1  | 7.1  | 5.3  | 10.5 | 2.6  | 4.8  | 3.7  | 4.5  | 4.1  | 6.8  | 5.8  | 6.8  | 1.1  | 3.1  |
| Nitrosococcus_oceani_ATCC_19707              | 9.5  | 1.0 | 4.7  | 6.6  | 3.9  | 7.6  | 2.4  | 5.8  | 4.2  | 11.2 | 2.2  | 3.2  | 5.0  | 4.5  | 6.6  | 5.7  | 5.0  | 6.5  | 1.5  | 2.9  |
| Oceanibulbus_indolifex                       | 12.2 | 0.9 | 6.1  | 6.0  | 3.7  | 8.5  | 2.1  | 5.2  | 3.3  | 10.1 | 2.9  | 2.7  | 5.0  | 3.4  | 6.5  | 5.2  | 5.5  | 7.2  | 1.3  | 2.2  |
| Oceanicola_batsensis                         | 12.3 | 0.8 | 6.3  | 6.3  | 3.6  | 9.0  | 2.0  | 5.0  | 2.7  | 9.9  | 2.7  | 2.4  | 5.2  | 3.0  | 7.3  | 5.0  | 5.5  | 7.3  | 1.3  | 2.2  |
| Oceanicola_granulosus                        | 13.6 | 0.8 | 6.2  | 6.3  | 3.5  | 9.2  | 2.0  | 4.5  | 2.2  | 10.4 | 2.4  | 2.2  | 5.3  | 2.7  | 7.5  | 4.7  | 5.3  | 7.5  | 1.4  | 2.1  |
| Oceanospirillum_sp_MED92                     | 8.8  | 1.1 | 5.7  | 7.0  | 4.0  | 7.0  | 2.2  | 6.3  | 5.1  | 10.7 | 2.6  | 3.9  | 4.0  | 4.5  | 4.9  | 6.6  | 5.0  | 6.8  | 1.2  | 2.8  |
| Octadecabacter_238                           | 11.4 | 1.1 | 6.1  | 5.4  | 3.8  | 8.0  | 2.3  | 5.6  | 4.1  | 9.5  | 2.9  | 3.0  | 4.7  | 3.4  | 6.5  | 5.4  | 5.8  | 7.0  | 1.5  | 2.3  |
| Octadecabacter_307                           | 11.3 | 1.0 | 6.2  | 5.2  | 3.9  | 8.3  | 2.2  | 5.8  | 3.7  | 9.6  | 3.0  | 3.1  | 4.7  | 3.4  | 6.3  | 5.5  | 5.9  | 7.2  | 1.4  | 2.3  |

| Genome                                | A    | C   | D   | E   | F   | G   | H   | I   | K   | L    | M   | N   | P   | Q   | R   | S   | T   | V   | W   | Y   |
|---------------------------------------|------|-----|-----|-----|-----|-----|-----|-----|-----|------|-----|-----|-----|-----|-----|-----|-----|-----|-----|-----|
| Pedobacter_BAL39                      | 7.7  | 0.7 | 5.4 | 5.8 | 4.9 | 6.9 | 1.8 | 6.9 | 6.7 | 9.6  | 2.4 | 5.4 | 3.7 | 3.8 | 4.2 | 6.6 | 5.7 | 6.4 | 1.1 | 4.1 |
| Photobacterium_angustum_S14           | 8.3  | 1.1 | 5.6 | 5.8 | 4.2 | 6.6 | 2.3 | 6.9 | 5.6 | 10.2 | 2.6 | 4.7 | 3.9 | 4.5 | 4.2 | 6.6 | 5.6 | 6.8 | 1.2 | 3.2 |
| Photobacterium_profundum_SS9          | 8.4  | 1.2 | 5.5 | 6.0 | 4.1 | 6.7 | 2.3 | 6.7 | 5.5 | 10.3 | 2.7 | 4.5 | 3.8 | 4.5 | 4.5 | 6.7 | 5.6 | 6.8 | 1.3 | 3.1 |
| Planctomyces_maris_DSM8797            | 8.1  | 1.1 | 5.6 | 6.5 | 4.0 | 7.1 | 2.2 | 5.8 | 4.8 | 10.1 | 2.2 | 3.8 | 5.0 | 4.8 | 5.5 | 6.7 | 5.7 | 6.6 | 1.5 | 2.8 |
| Polaribacter_irgensii_23-P            | 6.9  | 0.7 | 5.0 | 6.5 | 5.5 | 6.3 | 1.8 | 8.3 | 8.4 | 9.4  | 2.2 | 6.0 | 3.1 | 3.3 | 3.4 | 6.4 | 5.8 | 6.2 | 1.0 | 3.8 |
| Polaribacter_MED152                   | 6.3  | 0.7 | 5.6 | 6.6 | 5.4 | 6.1 | 1.6 | 8.2 | 8.4 | 9.2  | 2.0 | 6.8 | 3.1 | 3.3 | 3.2 | 6.5 | 5.9 | 6.2 | 1.0 | 4.0 |
| Polaromonas_JS666                     | 12.3 | 1.0 | 5.0 | 5.2 | 3.6 | 8.2 | 2.3 | 4.6 | 3.8 | 10.7 | 2.6 | 2.7 | 5.2 | 4.0 | 6.5 | 5.7 | 5.3 | 7.6 | 1.4 | 2.3 |
| Prochlorococcus_marinus_AS9601        | 5.4  | 1.1 | 5.2 | 6.7 | 4.9 | 6.3 | 1.5 | 9.1 | 8.6 | 10.7 | 1.8 | 6.5 | 3.6 | 3.0 | 3.9 | 7.7 | 4.5 | 5.2 | 1.3 | 2.9 |
| Prochlorococcus_marinus_CCMP1375      | 6.9  | 1.2 | 4.9 | 6.4 | 4.1 | 6.9 | 1.8 | 7.8 | 6.6 | 11.5 | 2.0 | 5.0 | 4.3 | 3.7 | 4.9 | 7.7 | 4.7 | 5.7 | 1.5 | 2.4 |
| Prochlorococcus_marinus_MED4          | 5.4  | 1.2 | 5.1 | 6.6 | 4.9 | 6.3 | 1.5 | 9.2 | 8.6 | 10.8 | 1.8 | 6.6 | 3.6 | 3.0 | 3.9 | 7.7 | 4.5 | 5.3 | 1.3 | 2.9 |
| Prochlorococcus_marinus_MIT_9215      | 5.4  | 1.2 | 5.1 | 6.7 | 5.0 | 6.2 | 1.5 | 9.1 | 8.7 | 10.8 | 1.8 | 6.5 | 3.6 | 3.0 | 3.9 | 7.7 | 4.4 | 5.2 | 1.3 | 2.9 |
| Prochlorococcus_marinus_MIT_9301      | 5.4  | 1.2 | 5.1 | 6.7 | 5.0 | 6.3 | 1.5 | 9.0 | 8.6 | 10.8 | 1.9 | 6.5 | 3.6 | 3.0 | 3.9 | 7.7 | 4.4 | 5.3 | 1.3 | 2.8 |
| Prochlorococcus_marinus_MIT_9303      | 9.4  | 1.3 | 5.1 | 5.8 | 3.3 | 7.7 | 2.2 | 5.1 | 3.7 | 12.3 | 2.2 | 3.5 | 5.1 | 4.8 | 6.3 | 7.0 | 4.8 | 6.6 | 1.7 | 2.1 |
| Prochlorococcus_marinus_MIT_9312      | 5.4  | 1.2 | 5.1 | 6.7 | 5.0 | 6.3 | 1.5 | 9.1 | 8.5 | 10.7 | 1.8 | 6.5 | 3.6 | 3.0 | 3.9 | 7.7 | 4.4 | 5.2 | 1.3 | 2.9 |
| Prochlorococcus_marinus_MIT_9313      | 9.6  | 1.3 | 5.1 | 5.8 | 3.3 | 7.8 | 2.2 | 4.9 | 3.5 | 12.5 | 2.1 | 3.2 | 5.2 | 4.9 | 6.5 | 6.8 | 4.7 | 6.8 | 1.7 | 2.0 |
| Prochlorococcus_marinus_MIT_9515      | 5.3  | 1.2 | 5.0 | 6.6 | 5.0 | 6.2 | 1.5 | 9.3 | 8.7 | 10.8 | 1.9 | 6.6 | 3.6 | 3.0 | 3.9 | 7.7 | 4.4 | 5.2 | 1.3 | 2.9 |
| Prochlorococcus_marinus_NATL1A        | 6.4  | 1.1 | 5.2 | 6.5 | 4.3 | 6.8 | 1.7 | 8.1 | 7.2 | 11.1 | 2.0 | 5.3 | 4.1 | 3.4 | 4.6 | 7.8 | 4.7 | 5.6 | 1.4 | 2.6 |
| Prochlorococcus_marinus_NATL2A        | 6.5  | 1.1 | 5.3 | 6.5 | 4.3 | 6.9 | 1.7 | 8.0 | 7.1 | 11.1 | 2.0 | 5.3 | 4.1 | 3.5 | 4.5 | 7.8 | 4.7 | 5.6 | 1.4 | 2.5 |
| Pseudoalteromonas_haloplanktis_TAC125 | 9.0  | 1.0 | 5.4 | 5.7 | 4.3 | 6.4 | 2.2 | 6.8 | 5.8 | 10.5 | 2.4 | 5.0 | 3.7 | 4.8 | 4.0 | 6.6 | 5.6 | 6.6 | 1.1 | 3.2 |
| Psychroflexus_ATCC700755              | 6.0  | 0.8 | 5.8 | 6.7 | 5.3 | 6.3 | 1.8 | 8.0 | 7.9 | 9.5  | 2.2 | 5.9 | 3.4 | 3.4 | 3.7 | 7.1 | 5.4 | 5.9 | 1.1 | 3.7 |
| Psychromonas_CNPT3                    | 8.1  | 1.2 | 5.4 | 5.6 | 4.4 | 6.2 | 2.2 | 7.6 | 6.5 | 11.0 | 2.6 | 4.7 | 3.4 | 4.6 | 4.0 | 6.9 | 5.2 | 6.3 | 1.0 | 3.1 |
| Psychromonas_ingrahamii_37            | 8.3  | 1.1 | 5.4 | 5.9 | 4.4 | 6.5 | 2.1 | 7.4 | 6.2 | 10.7 | 2.4 | 4.8 | 3.6 | 4.4 | 4.0 | 6.7 | 5.4 | 6.4 | 1.1 | 3.1 |
| Reinekea_MED297                       | 9.2  | 0.9 | 6.2 | 6.1 | 4.0 | 7.0 | 2.3 | 5.6 | 3.7 | 10.8 | 2.5 | 3.7 | 4.3 | 4.8 | 5.6 | 6.4 | 5.6 | 7.1 | 1.5 | 2.8 |
| Rhodobacterales_HTCC2654              | 12.1 | 0.8 | 6.5 | 6.1 | 3.8 | 8.9 | 2.0 | 5.1 | 3.2 | 9.5  | 2.8 | 2.6 | 5.1 | 2.9 | 6.7 | 4.9 | 5.7 | 7.5 | 1.4 | 2.2 |
| Rhodobacterales_Y4I                   | 12.9 | 1.0 | 5.6 | 6.2 | 3.7 | 8.8 | 2.1 | 4.8 | 3.4 | 10.2 | 2.7 | 2.6 | 5.1 | 3.6 | 6.6 | 5.2 | 5.1 | 6.9 | 1.4 | 2.3 |
| Rhodopirellula_baltica_SH1            | 9.3  | 1.3 | 6.2 | 6.0 | 3.7 | 7.5 | 2.3 | 4.9 | 3.4 | 9.3  | 2.4 | 3.4 | 5.3 | 4.0 | 6.9 | 7.4 | 5.9 | 7.0 | 1.5 | 2.1 |
| Rhodospirillales_BAL199               | 12.5 | 0.9 | 6.2 | 5.4 | 3.5 | 8.7 | 2.2 | 4.8 | 2.8 | 10.0 | 2.4 | 2.3 | 5.3 | 2.8 | 7.9 | 5.1 | 5.5 | 8.0 | 1.5 | 2.1 |
| Robiginitalea_biformata_HTCC2501      | 8.2  | 0.8 | 5.9 | 6.9 | 4.6 | 7.9 | 1.9 | 6.0 | 4.7 | 9.9  | 2.3 | 4.2 | 4.5 | 3.5 | 5.9 | 5.9 | 5.3 | 6.5 | 1.2 | 3.7 |
| Roseobacter_CCS2                      | 11.9 | 0.9 | 6.6 | 5.4 | 3.9 | 8.4 | 2.0 | 5.7 | 3.4 | 9.6  | 3.0 | 3.0 | 4.8 | 3.5 | 5.9 | 5.1 | 5.9 | 7.4 | 1.4 | 2.3 |
| Roseobacter_denitrificans_OCh_114     | 12.0 | 1.0 | 6.2 | 5.6 | 3.9 | 8.4 | 2.1 | 5.4 | 3.3 | 9.8  | 2.8 | 2.8 | 4.9 | 3.5 | 6.3 | 5.4 | 5.7 | 7.3 | 1.4 | 2.2 |
| Roseobacter_GAI101                    | 11.9 | 0.9 | 6.3 | 5.4 | 3.8 | 8.5 | 2.1 | 5.5 | 3.6 | 9.9  | 3.0 | 2.8 | 4.9 | 3.4 | 6.1 | 5.4 | 5.7 | 7.2 | 1.3 | 2.2 |
| Roseobacter_sp_MED193                 | 11.7 | 1.0 | 5.8 | 6.1 | 3.8 | 8.4 | 2.1 | 5.2 | 3.5 | 10.3 | 2.8 | 2.8 | 4.9 | 3.8 | 6.2 | 5.7 | 5.3 | 6.9 | 1.4 | 2.3 |
| Roseobacter_sp_SK209-2-6              | 11.5 | 1.0 | 5.5 | 6.6 | 3.9 | 8.5 | 2.1 | 5.2 | 3.7 | 10.4 | 2.8 | 2.8 | 4.9 | 3.8 | 6.2 | 5.8 | 5.1 | 6.7 | 1.4 | 2.3 |
| Roseovarius_217                       | 12.2 | 0.9 | 6.0 | 5.8 | 3.7 | 8.7 | 2.1 | 5.2 | 2.9 | 10.2 | 2.8 | 2.6 | 5.0 | 3.2 | 6.9 | 5.1 | 5.6 | 7.3 | 1.4 | 2.2 |
| Roseovarius_HTCC2601                  | 12.6 | 0.9 | 5.9 | 6.4 | 3.6 | 8.9 | 2.0 | 4.9 | 2.8 | 10.3 | 2.8 | 2.3 | 5.3 | 3.1 | 7.0 | 5.3 | 5.4 | 7.2 | 1.4 | 2.1 |
| Saccharophagus_degradans_2-40         | 9.5  | 1.0 | 5.6 | 6.1 | 4.0 | 7.1 | 2.1 | 5.9 | 4.9 | 9.8  | 2.2 | 4.7 | 4.1 | 4.1 | 4.5 | 6.9 | 5.7 | 7.1 | 1.4 | 3.2 |
| Sagittula_stellata                    | 12.4 | 0.9 | 6.3 | 5.9 | 3.7 | 8.9 | 2.1 | 4.8 | 3.0 | 10.0 | 2.9 | 2.5 | 5.2 | 3.0 | 6.9 | 5.1 | 5.7 | 7.5 | 1.4 | 2.2 |
| SAR116_HIMB100                        | 11.0 | 1.1 | 6.1 | 5.4 | 4.0 | 8.0 | 2.3 | 5.8 | 3.9 | 10.2 | 2.7 | 3.2 | 4.5 | 4.1 | 5.5 | 6.3 | 5.6 | 6.8 | 1.2 | 2.4 |
| SAR86_cluster_bacterium_SAR86C        | 6.3  | 1.0 | 6.0 | 6.5 | 4.7 | 6.8 | 1.7 | 8.7 | 7.2 | 9.7  | 2.5 | 5.8 | 3.6 | 2.9 | 3.7 | 7.9 | 4.8 | 6.1 | 1.0 | 3.2 |
| SAR86_cluster_bacterium_SAR86D        | 6.3  | 1.0 | 5.9 | 6.5 | 4.9 | 6.4 | 1.8 | 9.0 | 7.8 | 9.6  | 2.5 | 6.1 | 3.4 | 2.9 | 3.5 | 7.6 | 4.7 | 5.8 | 0.9 | 3.3 |
| SAR86_cluster_bacterium_SAR86E        | 7.0  | 0.9 | 5.8 | 6.6 | 4.9 | 6.9 | 1.9 | 8.3 | 6.8 | 9.9  | 2.4 | 5.4 | 3.8 | 3.4 | 3.7 | 7.7 | 4.7 | 5.8 | 1.0 | 3.0 |
| Shewanella_baltica_OS155              | 9.6  | 1.0 | 5.4 | 5.7 | 4.0 | 6.8 | 2.3 | 6.0 | 5.1 | 10.9 | 2.6 | 4.0 | 4.0 | 4.9 | 4.7 | 6.6 | 5.4 | 6.8 | 1.3 | 3.0 |
| Shewanella_baltica_OS185              | 9.6  | 1.1 | 5.5 | 5.7 | 4.0 | 6.8 | 2.3 | 6.1 | 5.0 | 10.8 | 2.6 | 4.1 | 4.0 | 4.9 | 4.5 | 6.6 | 5.5 | 6.8 | 1.3 | 3.0 |
| Shewanella_baltica_OS195              | 9.5  | 1.1 | 5.5 | 5.7 | 4.0 | 6.8 | 2.3 | 6.1 | 5.1 | 10.8 | 2.6 | 4.1 | 4.0 | 4.9 | 4.5 | 6.7 | 5.5 | 6.7 | 1.3 | 3.0 |
| Shewanella_denitrificans_OS217        | 9.3  | 1.0 | 5.5 | 5.6 | 4.0 | 6.8 | 2.3 | 6.2 | 5.2 | 10.9 | 2.5 | 4.3 | 3.9 | 5.0 | 4.3 | 7.0 | 5.3 | 6.6 | 1.2 | 3.0 |

| Genome                             | A    | C   | D   | E   | F   | G   | H   | I   | K   | L    | M   | N   | P   | Q   | R   | S   | T   | V   | W   | Y   |
|------------------------------------|------|-----|-----|-----|-----|-----|-----|-----|-----|------|-----|-----|-----|-----|-----|-----|-----|-----|-----|-----|
| Shewanella_frigidimarina_NCIMB_400 | 8.9  | 1.0 | 5.7 | 5.5 | 4.1 | 6.6 | 2.3 | 6.7 | 5.1 | 10.5 | 2.7 | 4.5 | 3.8 | 5.0 | 4.2 | 6.7 | 5.6 | 6.9 | 1.2 | 3.0 |
| Shewanella_KT99                    | 8.8  | 1.1 | 5.6 | 6.0 | 3.9 | 6.9 | 2.3 | 6.6 | 5.4 | 10.7 | 2.7 | 4.0 | 3.8 | 4.5 | 4.7 | 6.9 | 5.3 | 6.6 | 1.2 | 3.0 |
| Silicibacter_pomeroyi_DSS-3        | 12.5 | 1.0 | 5.9 | 5.7 | 3.7 | 8.9 | 2.1 | 5.0 | 2.8 | 10.3 | 2.8 | 2.5 | 5.2 | 3.3 | 7.0 | 5.0 | 5.3 | 7.2 | 1.4 | 2.2 |
| Sphingomonas_SKA58                 | 13.2 | 0.8 | 6.3 | 5.1 | 3.4 | 8.8 | 2.1 | 5.2 | 3.0 | 9.9  | 2.7 | 2.5 | 5.3 | 3.4 | 7.4 | 5.3 | 5.1 | 6.9 | 1.4 | 2.2 |
| Sphingopyxis_alaskensis_RB2256     | 14.0 | 0.8 | 6.2 | 5.3 | 3.5 | 8.9 | 2.0 | 5.1 | 2.9 | 9.8  | 2.5 | 2.4 | 5.4 | 2.9 | 7.7 | 5.0 | 5.0 | 7.0 | 1.5 | 2.1 |
| Sulfitobacter_sp_EE36              | 12.2 | 0.9 | 6.3 | 5.5 | 3.7 | 8.6 | 2.0 | 5.3 | 3.5 | 9.8  | 2.9 | 2.8 | 4.9 | 3.5 | 6.2 | 5.2 | 5.7 | 7.3 | 1.3 | 2.3 |
| Sulfitobacter_sp_NAS141            | 12.1 | 0.9 | 6.3 | 5.6 | 3.7 | 8.5 | 2.1 | 5.3 | 3.5 | 9.8  | 2.9 | 2.7 | 4.9 | 3.4 | 6.3 | 5.3 | 5.7 | 7.3 | 1.4 | 2.3 |
| Synechococcus_CC9311               | 9.6  | 1.3 | 5.3 | 5.8 | 3.3 | 8.0 | 2.1 | 4.9 | 3.2 | 12.3 | 2.2 | 3.1 | 5.2 | 4.7 | 6.7 | 7.0 | 4.9 | 6.9 | 1.7 | 1.9 |
| Synechococcus_CC9605               | 10.3 | 1.3 | 5.5 | 5.9 | 3.2 | 8.1 | 2.1 | 4.3 | 3.0 | 12.1 | 2.2 | 2.8 | 5.5 | 4.8 | 7.1 | 6.4 | 4.8 | 7.0 | 1.8 | 1.9 |
| Synechococcus_CC9902               | 9.8  | 1.3 | 5.5 | 5.7 | 3.2 | 8.1 | 2.2 | 4.7 | 3.1 | 12.2 | 2.1 | 3.0 | 5.3 | 4.7 | 6.9 | 6.6 | 4.9 | 7.0 | 1.7 | 1.9 |
| Synechococcus_elongatus_PCC_6301   | 10.5 | 1.1 | 5.1 | 5.7 | 3.5 | 7.2 | 1.7 | 5.4 | 2.6 | 12.3 | 1.6 | 2.8 | 5.5 | 6.1 | 6.8 | 6.0 | 5.2 | 6.6 | 1.7 | 2.5 |
| Synechococcus_elongatus_PCC_7942   | 10.5 | 1.1 | 5.1 | 5.7 | 3.5 | 7.2 | 1.7 | 5.4 | 2.6 | 12.3 | 1.6 | 2.8 | 5.5 | 6.1 | 6.8 | 6.0 | 5.2 | 6.6 | 1.8 | 2.5 |
| Synechococcus_RCC307               | 11.0 | 1.2 | 4.9 | 5.8 | 3.1 | 8.5 | 2.0 | 4.0 | 2.6 | 12.8 | 2.0 | 2.6 | 5.7 | 5.5 | 6.9 | 6.4 | 4.3 | 6.9 | 1.8 | 1.8 |
| Synechococcus_sp_WH8102            | 10.2 | 1.2 | 5.7 | 5.7 | 3.1 | 8.2 | 2.1 | 4.3 | 2.8 | 12.3 | 2.1 | 2.8 | 5.5 | 4.8 | 7.2 | 6.5 | 5.0 | 7.0 | 1.7 | 1.9 |
| Synechococcus_WH_7803              | 10.6 | 1.2 | 5.4 | 5.6 | 3.1 | 8.3 | 2.1 | 4.2 | 2.5 | 12.6 | 2.0 | 2.6 | 5.6 | 4.7 | 7.3 | 6.5 | 4.9 | 7.1 | 1.8 | 1.8 |
| Thalassobium_R2A62                 | 11.4 | 0.9 | 6.5 | 5.6 | 3.9 | 8.4 | 2.1 | 5.6 | 3.5 | 9.5  | 3.0 | 3.1 | 4.6 | 3.4 | 6.1 | 5.5 | 5.9 | 7.3 | 1.4 | 2.3 |
| Ulvibacter_SCB49                   | 6.8  | 0.8 | 5.8 | 6.7 | 5.1 | 6.4 | 1.7 | 7.8 | 7.6 | 9.2  | 2.2 | 6.0 | 3.3 | 3.3 | 3.3 | 6.4 | 6.3 | 6.4 | 1.0 | 4.0 |
| Vibrio_harveyi_ATCC_BAA-1116       | 8.4  | 1.1 | 5.5 | 6.6 | 4.1 | 6.6 | 2.3 | 6.1 | 5.7 | 10.1 | 2.7 | 4.2 | 3.9 | 4.5 | 4.7 | 6.6 | 5.4 | 7.0 | 1.3 | 3.2 |
| AAA076C03                          | 8.3  | 1.0 | 5.6 | 5.9 | 4.3 | 7.5 | 1.9 | 8.0 | 6.1 | 9.7  | 2.8 | 4.9 | 4.1 | 3.0 | 4.6 | 6.8 | 5.1 | 6.3 | 1.2 | 2.7 |
| AAA160J14                          | 6.0  | 1.1 | 5.3 | 5.8 | 4.8 | 6.5 | 1.7 | 9.4 | 8.5 | 9.7  | 2.4 | 6.5 | 3.6 | 2.8 | 3.5 | 7.3 | 4.9 | 5.9 | 1.1 | 3.1 |
| AAA076P09                          | 6.3  | 0.9 | 6.1 | 6.5 | 4.9 | 6.6 | 1.8 | 8.7 | 7.3 | 9.5  | 2.4 | 6.0 | 3.5 | 2.8 | 3.5 | 8.0 | 4.8 | 5.9 | 1.0 | 3.4 |
| AAA076P13                          | 6.4  | 0.9 | 6.1 | 6.5 | 4.9 | 6.6 | 1.8 | 8.7 | 7.3 | 9.5  | 2.4 | 6.0 | 3.5 | 2.9 | 3.5 | 8.0 | 4.9 | 6.0 | 1.0 | 3.3 |
| AAA168I18                          | 6.2  | 1.0 | 6.0 | 6.6 | 4.9 | 6.5 | 1.8 | 9.0 | 7.6 | 9.4  | 2.3 | 6.2 | 3.5 | 2.9 | 3.5 | 7.8 | 4.7 | 5.8 | 1.0 | 3.4 |
| AAA168P09                          | 6.2  | 0.9 | 6.0 | 6.6 | 4.9 | 6.5 | 1.8 | 9.1 | 7.6 | 9.5  | 2.3 | 6.2 | 3.5 | 2.9 | 3.5 | 7.8 | 4.8 | 5.8 | 1.0 | 3.4 |
| AAA160D02                          | 8.7  | 1.0 | 6.3 | 6.3 | 3.9 | 7.2 | 1.9 | 6.7 | 5.1 | 9.9  | 2.3 | 4.5 | 3.9 | 4.6 | 4.3 | 7.3 | 5.3 | 7.0 | 1.1 | 2.8 |
| AAA076D02                          | 7.0  | 1.1 | 5.7 | 6.3 | 4.6 | 6.9 | 2.0 | 8.1 | 6.6 | 9.7  | 2.7 | 5.3 | 3.6 | 3.3 | 3.8 | 7.8 | 4.8 | 6.5 | 1.1 | 3.1 |
| AAA076D13                          | 7.1  | 1.1 | 5.7 | 6.3 | 4.5 | 7.0 | 2.0 | 8.1 | 6.6 | 9.7  | 2.7 | 5.2 | 3.6 | 3.3 | 3.7 | 7.7 | 4.9 | 6.6 | 1.1 | 3.1 |
| AAA076E13                          | 6.8  | 1.1 | 5.8 | 6.4 | 4.6 | 6.8 | 2.0 | 8.2 | 6.8 | 9.7  | 2.6 | 5.4 | 3.5 | 3.3 | 3.7 | 7.8 | 4.8 | 6.3 | 1.1 | 3.2 |
| AAA076F14                          | 7.1  | 1.1 | 5.7 | 6.4 | 4.5 | 6.9 | 2.0 | 8.1 | 6.7 | 9.7  | 2.7 | 5.2 | 3.6 | 3.3 | 3.7 | 7.7 | 4.8 | 6.5 | 1.1 | 3.1 |
| AAA160P02                          | 6.1  | 0.7 | 5.4 | 6.4 | 5.4 | 6.4 | 1.8 | 8.5 | 8.2 | 9.2  | 2.1 | 6.2 | 3.2 | 3.3 | 3.3 | 6.9 | 5.9 | 6.0 | 1.0 | 3.9 |
| MS0242A                            | 6.5  | 0.7 | 5.3 | 6.5 | 5.3 | 6.8 | 1.9 | 7.8 | 7.1 | 9.8  | 2.2 | 5.6 | 3.8 | 3.7 | 3.6 | 7.0 | 5.6 | 6.0 | 1.2 | 3.7 |
| MS0243C                            | 8.0  | 0.7 | 5.2 | 6.0 | 5.1 | 7.0 | 1.9 | 7.2 | 7.0 | 9.8  | 2.3 | 5.2 | 3.8 | 3.7 | 3.4 | 6.6 | 5.7 | 6.5 | 1.1 | 3.7 |
| MS1901F                            | 6.3  | 0.9 | 6.4 | 6.2 | 4.6 | 6.8 | 1.8 | 8.3 | 6.6 | 9.0  | 2.6 | 5.7 | 3.4 | 3.2 | 3.8 | 7.0 | 5.6 | 6.3 | 1.1 | 4.3 |
| MS2205C                            | 6.7  | 0.9 | 5.8 | 6.6 | 5.2 | 7.0 | 1.8 | 7.7 | 6.3 | 9.3  | 2.5 | 5.4 | 3.5 | 3.3 | 3.8 | 7.4 | 5.4 | 6.5 | 1.1 | 3.7 |
| AAA160B08                          | 5.8  | 0.9 | 6.1 | 6.1 | 5.1 | 6.5 | 1.8 | 8.9 | 7.6 | 9.3  | 2.5 | 6.0 | 3.3 | 3.0 | 3.4 | 7.7 | 5.1 | 6.0 | 1.0 | 3.8 |
| AAA160C11                          | 6.0  | 0.8 | 6.3 | 6.2 | 5.0 | 6.7 | 1.7 | 8.6 | 7.7 | 9.0  | 2.4 | 6.0 | 3.3 | 3.0 | 3.5 | 7.7 | 5.3 | 6.1 | 1.1 | 3.7 |
| AAA160I06                          | 5.8  | 0.8 | 6.2 | 6.1 | 5.2 | 6.5 | 1.8 | 8.9 | 7.8 | 9.2  | 2.5 | 6.0 | 3.3 | 3.0 | 3.4 | 7.7 | 5.0 | 6.0 | 1.0 | 3.7 |
| AAA164E04                          | 7.8  | 1.1 | 5.7 | 6.2 | 4.4 | 7.7 | 2.5 | 5.9 | 5.1 | 9.9  | 2.6 | 4.0 | 4.8 | 4.0 | 5.5 | 6.9 | 5.2 | 6.3 | 1.7 | 2.7 |
| AAA164L15                          | 8.2  | 0.9 | 5.9 | 6.7 | 4.4 | 8.1 | 2.1 | 5.8 | 5.7 | 9.7  | 2.1 | 4.1 | 4.8 | 3.3 | 5.6 | 6.8 | 5.4 | 6.2 | 1.6 | 2.7 |
| AAA164M04                          | 8.2  | 0.9 | 5.8 | 6.8 | 4.4 | 7.9 | 2.0 | 6.0 | 5.8 | 9.8  | 2.1 | 4.0 | 4.7 | 3.3 | 5.5 | 6.9 | 5.4 | 6.3 | 1.5 | 2.6 |
| AAA164O14                          | 8.2  | 0.9 | 5.9 | 6.5 | 4.4 | 8.1 | 2.1 | 5.9 | 5.8 | 9.6  | 2.1 | 4.2 | 4.9 | 3.3 | 5.4 | 6.8 | 5.6 | 6.2 | 1.5 | 2.7 |
| AAA168E21                          | 8.3  | 0.9 | 5.9 | 6.7 | 4.4 | 8.1 | 2.1 | 5.9 | 5.7 | 9.7  | 2.0 | 4.1 | 4.8 | 3.3 | 5.5 | 6.8 | 5.5 | 6.2 | 1.5 | 2.6 |
| AAA168F10                          | 7.9  | 0.8 | 5.9 | 6.7 | 4.5 | 7.9 | 2.1 | 6.1 | 5.5 | 9.7  | 2.1 | 4.3 | 4.6 | 3.5 | 5.2 | 7.0 | 5.6 | 6.3 | 1.5 | 2.9 |
| AAA536B06                          | 10.3 | 1.1 | 6.0 | 5.1 | 4.2 | 7.9 | 2.2 | 6.8 | 5.0 | 9.8  | 2.9 | 3.9 | 4.3 | 3.3 | 5.2 | 6.2 | 5.1 | 6.7 | 1.2 | 2.6 |
| AAA536G10                          | 5.9  | 1.0 | 5.2 | 5.9 | 5.0 | 6.6 | 1.7 | 9.4 | 8.6 | 9.8  | 2.3 | 6.6 | 3.5 | 2.8 | 3.5 | 7.3 | 4.8 | 5.7 | 1.0 | 3.1 |

| <b>Genome</b> | <b>A</b> | <b>C</b> | <b>D</b> | <b>E</b> | <b>F</b> | <b>G</b> | <b>H</b> | <b>I</b> | <b>K</b> | <b>L</b> | <b>M</b> | <b>N</b> | <b>P</b> | <b>Q</b> | <b>R</b> | <b>S</b> | <b>T</b> | <b>V</b> | <b>W</b> | <b>Y</b> |
|---------------|----------|----------|----------|----------|----------|----------|----------|----------|----------|----------|----------|----------|----------|----------|----------|----------|----------|----------|----------|----------|
| AAA536K22     | 6.0      | 1.0      | 5.3      | 5.9      | 5.0      | 6.6      | 1.7      | 9.4      | 8.5      | 9.8      | 2.4      | 6.6      | 3.5      | 2.8      | 3.5      | 7.2      | 4.9      | 5.8      | 1.1      | 3.1      |
| AAA536G18     | 4.9      | 0.8      | 6.0      | 6.4      | 5.5      | 6.3      | 1.5      | 9.3      | 8.1      | 8.9      | 2.1      | 7.6      | 3.1      | 2.7      | 3.0      | 7.9      | 5.0      | 5.6      | 1.0      | 4.3      |
| AAA298K06     | 8.3      | 1.1      | 5.6      | 6.3      | 4.5      | 7.5      | 1.9      | 7.3      | 5.9      | 9.8      | 2.6      | 4.6      | 4.1      | 3.1      | 4.7      | 7.0      | 5.1      | 6.7      | 1.3      | 2.7      |
| AAA300J16     | 9.5      | 1.1      | 5.9      | 5.8      | 4.4      | 7.6      | 2.0      | 6.8      | 5.1      | 9.6      | 2.7      | 4.2      | 4.0      | 3.2      | 5.2      | 6.6      | 5.5      | 6.9      | 1.1      | 2.7      |
| AAA298N10     | 5.8      | 0.9      | 6.2      | 6.8      | 5.1      | 6.5      | 1.7      | 9.1      | 7.9      | 9.2      | 2.3      | 6.4      | 3.4      | 2.7      | 3.5      | 7.9      | 4.7      | 5.9      | 1.0      | 3.5      |
| AAA300D14     | 6.7      | 1.1      | 6.0      | 6.4      | 4.6      | 6.8      | 1.9      | 8.0      | 6.5      | 9.7      | 2.4      | 5.3      | 3.6      | 3.2      | 4.4      | 8.0      | 5.1      | 6.3      | 1.1      | 3.1      |
| AAA298D23     | 5.5      | 0.8      | 6.0      | 6.4      | 5.5      | 6.3      | 1.7      | 8.9      | 8.0      | 9.4      | 2.3      | 6.5      | 3.2      | 3.0      | 3.4      | 7.8      | 4.7      | 6.0      | 1.0      | 3.6      |
| AAA300K03     | 6.5      | 1.1      | 5.5      | 6.8      | 5.0      | 7.1      | 2.1      | 6.8      | 6.6      | 10.2     | 2.1      | 4.8      | 4.3      | 3.5      | 4.8      | 7.6      | 4.8      | 6.0      | 1.3      | 3.0      |
| AAA300N18     | 6.7      | 1.1      | 5.6      | 6.8      | 4.9      | 7.4      | 2.1      | 6.4      | 6.4      | 10.0     | 2.1      | 4.7      | 4.4      | 3.6      | 4.9      | 7.5      | 4.9      | 6.1      | 1.4      | 3.0      |
| AAA300O17     | 6.5      | 1.1      | 5.6      | 6.9      | 4.9      | 7.2      | 2.0      | 6.6      | 6.5      | 10.0     | 2.1      | 4.9      | 4.3      | 3.5      | 4.7      | 7.9      | 5.0      | 6.0      | 1.3      | 3.0      |
| AAA015O19     | 8.1      | 1.0      | 5.6      | 6.5      | 4.6      | 7.3      | 1.8      | 7.5      | 6.5      | 9.8      | 2.5      | 4.7      | 4.0      | 3.2      | 4.5      | 7.2      | 5.1      | 6.4      | 1.2      | 2.7      |
| AAA015N04     | 5.9      | 1.0      | 5.2      | 5.9      | 5.1      | 6.5      | 1.7      | 9.5      | 8.9      | 9.8      | 2.3      | 6.7      | 3.5      | 2.7      | 3.5      | 7.2      | 4.8      | 5.7      | 1.1      | 3.1      |
| AAA015D07     | 5.2      | 0.7      | 5.8      | 7.3      | 5.7      | 6.1      | 1.4      | 9.3      | 7.4      | 9.9      | 1.9      | 6.5      | 3.2      | 2.7      | 3.3      | 7.6      | 5.1      | 6.3      | 1.0      | 3.7      |
| AAA015M09     | 5.2      | 0.7      | 5.9      | 7.2      | 5.5      | 6.3      | 1.4      | 9.2      | 7.4      | 9.8      | 1.9      | 6.4      | 3.3      | 2.8      | 3.4      | 7.6      | 5.2      | 6.2      | 1.0      | 3.7      |

**Table S7.** Properties of amino acids which are overrepresented and underrepresented in SAGs, as compared to marine cultures. Abbreviations: % GC, fraction of GC in the first two codon positions; ATP cost, the metabolic cost for aerobic synthesis by *E. coli* (62); pI, isoelectric point; pK, dissociation constants of respective groups.

| Amino acid              | Short | %GC           | ATP cost      | Atoms C       | Atoms N       | pI            | pK1 ( $\alpha$ -COOH) | pK2 ( $\alpha$ -NH <sub>3</sub> ) | Polar | Aromatic or aliphatic | pH             | Hydrophobic |
|-------------------------|-------|---------------|---------------|---------------|---------------|---------------|-----------------------|-----------------------------------|-------|-----------------------|----------------|-------------|
| <b>Enriched in SAGs</b> |       |               |               |               |               |               |                       |                                   |       |                       |                |             |
| Tyrosine                | Y     | 0             | -8            | 9             | 1             | 5.64          | 2.2                   | 9.21                              | X     | Aromatic              | weak acidic    | -           |
| Phenylalanine           | F     | 0             | -6            | 9             | 1             | 5.49          | 2.2                   | 9.31                              | -     | Aromatic              | -              | X           |
| Isoleucine              | I     | 0             | 7             | 6             | 1             | 6.05          | 2.32                  | 9.76                              | -     | Aliphatic             | -              | X           |
| Glutamic acid           | E     | 50            | -7            | 5             | 1             | 3.15          | 2.1                   | 9.47                              | X     | -                     | acidic         | -           |
| Asparagine              | N     | 0             | 3             | 4             | 2             | 5.41          | 2.14                  | 8.72                              | X     | -                     | weak basic     | -           |
| Lysine                  | K     | 0             | 5             | 6             | 2             | 9.6           | 2.16                  | 9.06                              | X     | -                     | basic          | -           |
| Serine                  | S     | 50            | -2            | 3             | 1             | 5.68          | 2.19                  | 9.21                              | X     | -                     | weak acidic    | -           |
| <b>Average</b>          |       | <b>14</b>     | <b>-1.14</b>  | <b>6.00</b>   | <b>1.29</b>   | <b>5.86</b>   | <b>2.19</b>           | <b>9.25</b>                       |       |                       |                |             |
| <b>Depleted in SAGs</b> |       |               |               |               |               |               |                       |                                   |       |                       |                |             |
| Valine                  | V     | 50            | -2            | 5             | 1             | 6             | 2.39                  | 9.74                              | -     | Aliphatic             | -              | X           |
| Glycine                 | G     | 100           | -2            | 2             | 1             | 6.06          | 2.35                  | 9.78                              | -     | -                     | -              | X           |
| Alanine                 | A     | 100           | -1            | 3             | 1             | 6.01          | 2.35                  | 9.87                              | -     | -                     | -              | X           |
| Arginine                | R     | 100           | 5             | 6             | 4             | 10.76         | 1.82                  | 8.99                              | X     | -                     | strongly basic | -           |
| Proline                 | P     | 100           | -2            | 5             | 1             | 6.3           | 1.95                  | 10.64                             | -     | -                     | -              | X           |
| Histidine               | H     | 50            | 1             | 6             | 3             | 7.6           | 1.8                   | 9.33                              | X     | Aromatic              | weak basic     | -           |
| Tryptophan              | W     | 50            | -7            | 11            | 2             | 5.89          | 2.46                  | 9.41                              | -     | Aromatic              | weak basic     | -           |
| <b>Average</b>          |       | <b>79%</b>    | <b>-1.14</b>  | <b>5.43</b>   | <b>1.86</b>   | <b>6.95</b>   | <b>2.16</b>           | <b>9.68</b>                       |       |                       |                |             |
| <b>P-value (t-test)</b> |       | <b>0.0005</b> | <b>1.0000</b> | <b>0.6893</b> | <b>0.2707</b> | <b>0.2925</b> | <b>0.8137</b>         | <b>0.0885</b>                     |       |                       |                |             |

**Table S8.** The most common glycoside hydrolase families detected in Verrucomicrobia, Bacteroidetes and Gammaproteobacteria SAR92 SAGs.

| CAZy family | Putative enzyme/s                                                     | Putative substrates                                                                                                |
|-------------|-----------------------------------------------------------------------|--------------------------------------------------------------------------------------------------------------------|
| GH109       | $\alpha$ -N-acetylgalactosaminidase (EC 3.2.1.49)                     | N-acetylgalactosamine (glycoproteins from cellular surface and cell wall)                                          |
| GH33        | sialidase or neuraminidase (EC 3.2.1.18)                              | glycosidic linkages of terminal sialic residues in oligosaccharides, glycoproteins and glycolipids,                |
|             | (2) $\beta$ -N-acetylhexosaminidase (EC 3.2.1.52)                     | Hexosamines                                                                                                        |
| GH3         | (2) $\beta$ -glucosidase (EC 3.2.1.21)                                | beta-D-glucosides ( $\beta$ -D-galactosides, $\alpha$ -L-arabinosides, $\beta$ -D-xylosides, $\beta$ -D-fucosides) |
|             | (1) glucan 1,4- $\beta$ -glucosidase (EC 3.2.1.74)                    | 1,4- $\beta$ -D-glucans and related oligosaccharides                                                               |
| GH13        | (1) cyclomaltodextrinase (EC 3.2.1.54)                                | cyclomaltodextrin                                                                                                  |
|             | (7) $\alpha$ -amylase (EC 3.2.1.1)                                    | starch, glycogen and related polysaccharides and oligosaccharides                                                  |
| GH81        | endo- $\beta$ -1,3-glucanase (EC 3.2.1.39)                            | laminarin                                                                                                          |
| GH2         | (2) $\beta$ -glucuronidase (EC 3.2.1.31)                              | $\beta$ -D-glucuronic acid (glycosaminoglycans/mucopolysaccharides)                                                |
| GH43        | xylosidase/arabinosidase (EC 3.2.1.37, EC 3.2.1.55)                   | xylan , arabinans                                                                                                  |
| GH5         | Cellulase family A (including endo-1,4- $\beta$ -xylanase EC 3.2.1.8) | Cellulose and hemicellulose                                                                                        |
| GH9         | Cellobiohydrolase (EC 3.2.1.91)                                       | cellulose and cellotetraose                                                                                        |
| GH10        | endo-1,4- $\beta$ -xylanase (EC 3.2.1.8)                              | xylan                                                                                                              |
| GH127 /121  | arabinofuranosidase (EC 3.2.1.55)                                     | L-arabinofuranosides (pectins, hemicelluloses and others)                                                          |
| GH78        | $\alpha$ -L-rhamnosidase (EC 3.2.1.40)                                | $\alpha$ -L-rhamnoside                                                                                             |

**Table S9.** Presence (X) and absence of central carbon metabolism pathway genes identified in Gammaproteobacteria SAGs.

| Enzyme/Pathway                                                         | SAR86     |           |           |           |           | ARCTIC    |           |           |           | SAR92     |           |
|------------------------------------------------------------------------|-----------|-----------|-----------|-----------|-----------|-----------|-----------|-----------|-----------|-----------|-----------|
|                                                                        | AAA076P09 | AAA076P13 | AAA168I18 | AAA168P09 | AAA298N10 | AAA076D02 | AAA076D13 | AAA076E13 | AAA076F14 | AAA160D02 | AAA300D14 |
| <b>Central Carbon Metabolism</b>                                       |           |           |           |           |           |           |           |           |           |           |           |
| <b>Glycolysis</b>                                                      |           |           |           |           |           |           |           |           |           |           |           |
| glucokinase (2.7.1.2)                                                  |           |           |           |           |           |           | X         | X         | X         | X         | X         |
| glucose-6-phosphate isomerase / aldose 1-epimerase (5.3.1.9 / 5.1.3.3) |           | X         | X         | X         |           | X         | X         | X         | X         | X         | X         |
| 6-phosphofructokinase (2.7.1.11)                                       | X         | X         | X         | X         | X         | X         |           |           | X         |           |           |
| fructose 1,6-bisphosphate aldolase (4.1.2.13)                          | X         | X         | X         | X         | X         | X         | X         | X         | X         |           |           |
| triosephosphate isomerase (5.3.1.1)                                    | X         | X         | X         | X         | X         | X         | X         |           | X         | X         | X         |
| glyceraldehyde-3-phosphate dehydrogenase (1.2.1.12)                    | X         | X         | X         | X         | X         | X         | X         | X         | X         | X         | X         |
| phosphoglycerate kinase (2.7.2.3)                                      |           | X         | X         | X         | X         | X         | X         | X         | X         |           | X         |
| phosphoglycerate mutase (5.4.2.1)                                      |           |           |           |           |           | X         | X         |           | X         |           | X         |
| enolase (4.2.1.11)                                                     | X         | X         | X         | X         | X         | X         | X         | X         | X         | X         | X         |
| pyruvate kinase (2.7.1.40)                                             | X         | X         |           | X         | X         | X         | X         | X         | X         | X         | X         |
| <b>Pentose Phosphate Pathway</b>                                       |           |           |           |           |           |           |           |           |           |           |           |
| glucose-6-phosphate dehydrogenase (1.1.1.49)                           | X         | X         |           |           |           |           | X         | X         | X         | X         | X         |
| 6-phosphogluconolactonase (3.1.1.31)                                   | X         | X         |           |           |           |           | X         | X         | X         | X         | X         |
| 6-phosphogluconate dehydrogenase (1.1.1.44)                            |           |           |           |           |           |           | X         | X         | X         |           |           |
| ribulose-phosphate 3-epimerase (5.1.3.1)                               | X         | X         |           | X         | X         | X         | X         |           | X         |           | X         |
| ribose-5-phosphate isomerase (5.3.1.6)                                 | X         | X         | X         | X         | X         | X         | X         |           | X         |           | X         |
| transketolase (2.2.1.1)                                                | X         | X         | X         | X         | X         | X         | X         | X         | X         |           | X         |
| transaldolase (2.2.1.2)                                                |           |           |           |           |           |           |           |           |           |           | X         |
| <b>Entner-Doudoroff Pathway (modified or semi-phosphorylated)</b>      |           |           |           |           |           |           |           |           |           |           |           |
| glucokinase (2.7.1.2)                                                  |           |           |           |           |           |           | X         | X         | X         | X         | X         |
| glucose-6-phosphate dehydrogenase (1.1.1.49)                           | X         |           |           | X         |           |           | X         | X         | X         |           | X         |
| 6-phosphogluconate dehydratase (4.2.1.12)                              | X         | X         |           | X         |           |           |           |           |           | X         | X         |
| 2-dehydro-3-deoxygluconokinase (2.7.1.45)                              |           | X         |           | X         |           |           |           |           |           |           |           |
| 2-dehydro-3-deoxy-phosphogluconate aldolase (4.1.2.14)                 | X         | X         |           | X         |           |           |           |           |           | X         | X         |
| glyceraldehyde-3-phosphate dehydrogenase (1.2.1.12)                    | X         | X         | X         | X         |           | X         | X         | X         | X         | X         | X         |



| Enzyme/Pathway                                                                       | SAR86         |               |               |               |               | ARCTIC        |               |               |               | SAR92         |               |
|--------------------------------------------------------------------------------------|---------------|---------------|---------------|---------------|---------------|---------------|---------------|---------------|---------------|---------------|---------------|
|                                                                                      | AAA076P<br>09 | AAA076P1<br>3 | AAA168I1<br>8 | AAA168P0<br>9 | AAA298N<br>10 | AAA076D<br>02 | AAA076D<br>13 | AAA076E<br>13 | AAA076F<br>14 | AAA160D<br>02 | AAA300D<br>14 |
| phosphoglycerate kinase (2.7.2.3)                                                    |               | X             | X             | X             | X             | X             | X             | X             | X             |               |               |
| phosphoglycerate mutase (5.4.2.1)                                                    |               |               |               | X             |               | X             | X             |               | X             |               | X             |
| enolase (4.2.1.11)                                                                   | X             | X             | X             | X             | X             | X             | X             | X             | X             | X             | X             |
| pyruvate kinase (2.7.1.40)                                                           | X             | X             |               | X             | X             | X             | X             | X             | X             | X             | X             |
| <i>*unique to this pathway; all others shared by glycolysis and the PPP pathways</i> |               |               |               |               |               |               |               |               |               |               |               |
| <b>Fate of Pyruvate</b>                                                              |               |               |               |               |               |               |               |               |               |               |               |
| <b><i>Pyruvate Dehydrogenase Reaction</i></b>                                        |               |               |               |               |               |               |               |               |               |               |               |
| pyruvate dehydrogenase (1.2.4.1)                                                     | X             | X             | X             | X             | X             | X             | X             | X             | X             | X             | X             |
| <b>Citric Acid Cycle (TCA)</b>                                                       |               |               |               |               |               |               |               |               |               |               |               |
| citrate synthase (2.3.1.1)                                                           |               |               |               |               |               | X             | X             |               | X             | X             | X             |
| aconitate hydratase (4.2.1.3)                                                        | X             | X             | X             | X             |               | X             | X             | X             | X             |               | X             |
| isocitrate dehydrogenase (1.1.1.42)                                                  |               |               | X             | X             | X             | X             | X             |               | X             | X             | X             |
| oxoglutarate dehydrogenase (1.2.4.2)                                                 |               | X             | X             | X             |               |               | X             | X             |               | X             | X             |
| succinyl CoA-synthetase (6.2.1.5)                                                    |               | X             | X             | X             |               | X             | X             |               | X             | X             | X             |
| succinate dehydrogenase (1.3.99.1)                                                   |               | X             | X             | X             |               | X             | X             |               | X             |               | X             |
| fumarate hydratase (4.2.1.2)                                                         | X             | X             | X             | X             | X             | X             | X             |               | X             | X             | X             |
| malate dehydrogenase (1.1.1.37)                                                      | X             | X             | X             | X             | X             | X             | X             |               | X             |               | X             |

**Table S10.** Presence (X) and absence of photoheterotrophy pathway genes identified in Gammaproteobacteria SAGs.

| Enzyme                                                | SAR86         |               |               |               |               | ARCTIC        |               |               |               | SAR92         |               |
|-------------------------------------------------------|---------------|---------------|---------------|---------------|---------------|---------------|---------------|---------------|---------------|---------------|---------------|
|                                                       | AAA076<br>P09 | AAA076<br>P13 | AAA168I<br>18 | AAA168<br>P09 | AAA298<br>N10 | AAA076<br>D02 | AAA076<br>D13 | AAA076<br>E13 | AAA076<br>F14 | AAA160<br>D02 | AAA300<br>D14 |
| Proterorhodopsin                                      | X             | X             | X             | X             | X             | X             | X             | X             | X             | X             |               |
| <b>Retinal Biosynthesis Pathway</b>                   |               |               |               |               |               |               |               |               |               |               |               |
| geranylgeranyl pyrophosphate synthase ( <i>crtE</i> ) | X             | X             | X             | X             | X             | X             | X             | X             | X             | X             | X             |
| phytoene desaturase ( <i>crtI</i> )                   |               |               |               |               |               |               |               |               |               | X             | X             |
| phytoene synthase ( <i>crtB</i> )                     |               |               |               |               |               |               |               |               |               | X             | X             |
| lycopene cyclase ( <i>crtY</i> )                      |               |               |               |               |               |               |               |               |               | X             |               |
| flanked by dehydrogenase                              | X             | X             | X             | X             | X             |               |               |               |               |               |               |

## Supplementary References

1. Fuhrman JA, McCallum K, Davis AA (1993) Phylogenetic diversity of subsurface marine microbial communities from the Atlantic and Pacific Oceans. *Appl Environ Microb* 59(5):1294–1302.
2. Gordon DA, Giovannoni SJ (1996) Detection of stratified microbial populations related to *Chlorobium* and *Fibrobacter* species in the Atlantic and Pacific oceans. *Appl Environ Microb* 62(4):1171–1177.
3. Freitas S, et al. (2012) Global distribution and diversity of marine Verrucomicrobia. *ISME J* 6(8):1499–1505.
4. Martinez-Garcia M, et al. (2012) Capturing single cell genomes of active polysaccharide degraders: an unexpected contribution of Verrucomicrobia. *PLoS ONE* 7:e35314.
5. Rappé MS, Gordon DA, Vergin KL, Giovannoni SJ (1999) Phylogeny of actinobacteria small subunit (SSU) rRNA gene clones recovered from marine bacterioplankton. *Syst Appl Microbiol* 22:106–112.
6. Wong LL (1998) Cytochrome P450 monooxygenases. *Curr Opin Chem Biol* 2:263–268.
7. Harayama S (1997) Polycyclic aromatic hydrocarbon bioremediation design. *Curr Opin Biotech* 8:268–273.
8. Demanèche S, et al. (2004) Identification and functional analysis of two aromatic-ring-hydroxylating dioxygenases from a *Sphingomonas* strain that degrades various polycyclic aromatic hydrocarbons. *Appl Environ Microb* 70:6714–6725.
9. Evans WC (1963) The microbiological degradation of aromatic compounds. *J Gen Microbiol* 32:177–184.
10. Gibson DT, Parales RE (2000) Aromatic hydrocarbon dioxygenases in environmental biotechnology. *Curr Opin Biotech* 11:236–243.
11. Juhasz AL, Naidu R (2000) Bioremediation of high molecular weight polycyclic aromatic hydrocarbons: a review of the microbial degradation of benzo [a] pyrene. *Int Biodeter Biodegr* 45:57–88.
12. Roldán MD, Pérez-Reinado E, Castillo F, Moreno-Vivián C (2008) Reduction of polynitroaromatic compounds: the bacterial nitroreductases. *FEMS Microbiol Rev* 32:474–500.

13. Symons ZC, Bruce NC (2006) Bacterial pathways for degradation of nitroaromatics. *Nat Prod Rep* 23:845.
14. Ullrich R, Hofrichter M (2007) Enzymatic hydroxylation of aromatic compounds. *Cell Mol Life Sci* 64:271–293.
15. de Oliveira IM, Bonatto D, Henriques JAP (2010) Nitroreductases: Enzymes with environmental, biotechnological and clinical importance. *Reactions* 3:6.
16. Sun J, et al. (2011) One carbon metabolism in SAR11 pelagic marine bacteria. *PLOS ONE* 6:e23973.
17. Peters A, Kulajta C, Pawlik G, Daldal F, Koch H-G (2008) Stability of the cbb3-type cytochrome oxidase requires specific CcoQ-CcoP interactions. *J Bacteriol* 190:5576–5586.
18. Pitcher R, Brittain T, Watmough N (2002) Cytochrome cbb(3) oxidase and bacterial microaerobic metabolism. *Biochem Soc T* 30:653–658.
19. Alldredge AL, Cohen Y (1987) Can microscale chemical patches persist in the sea? Microelectrode study of marine snow, fecal pellets. *Science* 235:689–691.
20. Oh H-M, et al. (2010) Complete genome sequence of "Candidatus Puniceispirillum marinum" IMCC1322, a representative of the SAR116 clade in the *Alphaproteobacteria*. *J Bacteriol* 192(12):3240–3241.
21. Grote J, et al. (2011) Draft genome sequence of strain HIMB100, a cultured representative of the SAR116 clade of marine *Alphaproteobacteria*. *Stand Genomic Sci* 5(3):269–278.
22. King GM, Weber CF (2007) Distribution, diversity and ecology of aerobic CO-oxidizing bacteria. *Nat Rev Microbiol* 5(2):107–118.
23. Sabeji G, et al. (2007) Adaptation and spectral tuning in divergent marine proteorhodopsins from the eastern Mediterranean and the Sargasso Seas. *ISME J* 1(1):48–55.
24. Junier I, Martin O, Képès F (2010) Spatial and topological organization of DNA chains induced by gene co-localization. *PLOS Comput Biol* 6(2):e1000678.
25. Buchan A, Gonzalez JM, Moran MA (2005) Overview of the marine Roseobacter lineage. *Appl Environ Microb* 71(10):5665–5677.
26. Luo H, Löytynoja A, Moran MA (2012) Genome content of uncultivated marine Roseobacters in the surface ocean. *Environ Microbiol* 14(1):41–51.

27. McCarren J, DeLong EF (2007) Proteorhodopsin photosystem gene clusters exhibit co-evolutionary trends and shared ancestry among diverse marine microbial phyla. *Environ Microbiol* 9(4):846–858.
28. Sabehi G, Béjà O, Suzuki MT, Preston CM, DeLong EF (2004) Different SAR86 groups harbour divergent proteorhodopsins. *Environ Microbiol* 6:903–910.
29. Dupont CL, et al. (2012) Genomic insights to SAR86, an abundant and uncultivated marine bacterial lineage. *ISME J* 6(6):1186–1199.
30. Man D, et al. (2003) Diversification and spectral tuning in marine proteorhodopsins. *EMBO J* 22(8):1725–1731.
31. Swan BK, et al. (2011) Potential for chemolithoautotrophy among ubiquitous bacteria lineages in the dark ocean. *Science* 333(6047):1296–1300.
32. Cottrell MT, Kirchman DL (2000) Community composition of marine bacterioplankton determined by 16S rRNA gene clone libraries and fluorescence *in situ* hybridization. *Appl Environ Microb* 66(12):5116–5122.
33. Glöckner FO, Fuchs BM, Amann R (1999) Bacterioplankton compositions of lakes and oceans: a first comparison based on fluorescence *in situ* hybridization. *Appl Environ Microb* 65(8):3721–3726.
34. Nikrad MP, Cottrell MT, Kirchman DL (2012) Abundance and single-cell activity of heterotrophic bacterial groups in the western Arctic Ocean in summer and winter. *Appl Environ Microb* 78(7):2402–2409.
35. Malmstrom RR, Straza TRA, Cottrell MT, Kirchman DL (2007) Diversity, abundance, and biomass production of bacterial groups in the western Arctic Ocean. *Aquat Microb Ecol* 47:45–55.
36. Alonso-Sáez L, Sánchez O, Gasol JM, Balagué V, Pedrós-Alio C (2008) Winter-to-summer changes in the composition and single-cell activity of near-surface Arctic prokaryotes. *Environ Microbiol* 10(9):2444–2454.
37. González JM, et al. (2008) Genome analysis of the proteorhodopsin-containing marine bacterium *Polaribacter* sp. MED152 (*Flavobacteria*). *Proc Natl Acad Sci USA* 105(25):8724–8729.
38. Gómez-Consarnau L, et al. (2007) Light stimulates growth of proteorhodopsin-containing marine *Flavobacteria*. *Nature* 445(7124):210–213.

39. Bauer M, et al. (2006) Whole genome analysis of the marine *Bacteroidetes* 'Gramella forsetii' reveals adaptations to degradation of polymeric organic matter. *Environ Microbiol* 8(6):2201–2213.
40. González JM, et al. (2011) Genomics of the proteorhodopsin-containing marine flavobacterium *Dokdonia* sp. strain MED134. *Appl Environ Microb* 77(24):8676–8686.
41. Béjà O, et al. (2002) Comparative genomic analysis of archaeal genotypic variants in a single population and in two different oceanic provinces. *Appl Environ Microb* 68(1):335–345.
42. Stein JL, Marsh TL, Wu KY, Shizuya H, DeLong EF (1996) Characterization of uncultivated prokaryotes: Isolation and analysis of a 40-kilobase-pair genome fragment from a planktonic marine archaeon. *J Bacteriol* 178(3):591–599.
43. Hsiao WWL, et al. (2005) Evidence of a large novel gene pool associated with prokaryotic genomic islands. *PLOS Genet* 1(5):e62.
44. Bennett S (2004) Solexa Ltd. *Pharmacogenomics* 5(4):433–438.
45. Margulies M, et al. (2005) Genome sequencing in microfabricated high-density picolitre reactors. *Nature* 437(7057):376–380.
46. Zerbino DR, Birney E (2008) Velvet: Algorithms for de novo short read assembly using de Bruijn graphs. *Gen Res* 18(5):821–829.
47. Ewing B, Green P (1998) Base-calling of automated sequencer traces using phred. II. Error probabilities. *Gen Res* 8:186–194.
48. Gordon D, Abajian C, Green P (1998) Consed: a graphical tool for sequence finishing. *Gen Res* 8:195–202.
49. Han C, Chain P (2006) Finishing repeat regions automatically with Dupfinisher. *Proceeding of the 2006 international conference on bioinformatics & computational biology*, ed Valafar HRAH (CSREA Press), pp 141–146.
50. Woyke T, et al. (2009) Assembling the marine metagenome, one cell at a time. *PLOS ONE* 4(4):e5299.
51. Hyatt D, et al. (2010) Prodigal: Prokaryotic gene recognition and translation initiation site identification. *BMC Bioinformatics* 11(1):119.
52. Hacker J, Kaper JB (2000) Pathogenicity islands and the evolution of microbes. *Annu Rev Microbiol* 54(1):641–679.

53. Pruesse E, et al. (2007) SILVA: A comprehensive online resource for quality checked and aligned ribosomal RNA sequence data compatible with ARB. *Nucl Acids Res* 35(21):7188–7196.
54. Makarova KS, et al. (1999) Comparative genomics of the *Archaea* (*Euryarchaeota*): Evolution of conserved protein families, the stable core, and the variable shell. *Gen Res* 9(7):608–628.
55. Markowitz VM, et al. (2008) IMG/M: a data management and analysis system for metagenomes. *Nucl Acids Res* 36(suppl\_1):D534–538.
56. Philippot L (2002) Denitrifying genes in bacterial and Archaeal genomes. *BBA-Gene Struct Expr* 1577(3):355–376.
57. Beaumont HJE, et al. (2002) Nitrite reductase of *Nitrosomonas europaea* is not essential for production of gaseous nitrogen oxides and confers tolerance to nitrite. *J Bacteriol* 184(9):2557–2560.
58. Cantarel BL, et al. (2009) The Carbohydrate-Active EnZymes database (CAZy): An expert resource for glycogenomics. *Nucl Acids Res* 37:D233–238.
59. Park BH, Karpinets TV, Syed MH, Leuze MR, Uberbacher EC (2010) CAZymes Analysis Toolkit (CAT): Web service for searching and analyzing carbohydrate-active enzymes in a newly sequenced organism using CAZy database. *Glycobiology* 20:1574–1584.
60. Lauro FM, et al. (2009) The genomic basis of trophic strategy in marine bacteria. *Proc Natl Acad Sci USA* 106(37):15527–15533.
61. Tully BJ, Nelson WC, Heidelberg JF (2011) Metagenomic analysis of a complex marine planktonic thaumarchaeal community from the Gulf of Maine. *Environ Microbiol* 14(1):254–267.
62. Phillips R, Kondev J, Theriot J (2008) *Physical biology of the cell*.
